# Supplementary material for: EMT-related gene expression is positively correlated with immunity and may be derived from stromal cells in osteosarcoma
Source: PeerJ. 2020 Feb 3;8:e8489. doi: 10.7717/peerj.8489 (PMC7003688; doi:10.7717/peerj.8489)
Supplement: Supplemental Information 1 [file peerj-08-8489-s001.xlsx]

## Sheet: Fig.1_GSE16091
https://www.ncbi.nlm.nih.gov/geo/query/acc.cgi?acc=GSE16091
	GSM402739	GSM402734	GSM402727	GSM402747	GSM402720	GSM402740	GSM402725	GSM402726	GSM402729	GSM402724	GSM402732	GSM402743	GSM402749	GSM402750	GSM402735	GSM402737	GSM402723	GSM402736	GSM402746	GSM402745	GSM402721	GSM402733	GSM402744	GSM402728	GSM402730	GSM402722	GSM402731	GSM402751	GSM402748	GSM402718	GSM402741	GSM402738	GSM402719	GSM402742
HALLMARK_EPITHELIAL_MESENCHYMAL_TRANSITION	-2.00031	-1.9796	-1.66817	-1.4492	-1.35008	-1.12794	-0.956184	-0.695828	-0.543322	-0.442495	-0.389915	-0.101017	-0.0439127	-0.0401985	-0.0302615	0.0296627	0.0377079	0.111467	0.112604	0.297115	0.351529	0.353549	0.361054	0.413428	0.436415	0.480296	0.55332	0.71164	0.875244	1.17807	1.20459	1.5504	1.69603	2.06432
	GSM402739	GSM402734	GSM402727	GSM402747	GSM402720	GSM402740	GSM402725	GSM402726	GSM402729	GSM402724	GSM402732	GSM402743	GSM402749	GSM402750	GSM402735	GSM402737	GSM402723	GSM402736	GSM402746	GSM402745	GSM402721	GSM402733	GSM402744	GSM402728	GSM402730	GSM402722	GSM402731	GSM402751	GSM402748	GSM402718	GSM402741	GSM402738	GSM402719	GSM402742
ABI3BP	4.79088	5.2462	4.92987	4.7231	4.77906	4.81793	4.98227	4.68099	4.86162	5.1924	4.88245	4.7718	4.67912	4.84499	4.81897	4.87871	4.84627	4.72498	4.95514	4.70481	5.85933	4.71978	4.85153	4.92504	4.69618	4.70593	4.67305	4.74193	4.71627	5.06017	4.83652	4.5433	4.85181	5.28849
ACTA2	6.62854	7.51688	6.59644	6.57319	6.02752	6.21001	7.653	6.48738	6.77033	7.51929	7.69686	7.59158	7.24418	6.58372	7.17007	6.93244	8.18887	7.12844	7.48267	6.67256	7.61425	6.99963	8.18011	7.27855	7.06203	8.09299	7.62604	7.56098	6.81628	7.37688	7.2253	8.21557	7.72463	7.4067
ADAM12	5.82834	6.36401	5.81639	6.32397	5.23224	5.43306	5.72066	6.42231	6.01733	5.76561	5.86893	5.46213	6.27155	5.50672	5.88256	5.40641	5.80073	6.92613	5.97204	5.88933	5.78839	5.83421	5.73331	5.29102	5.4615	5.99737	6.20752	5.6297	6.57952	6.31121	5.77377	7.67099	5.46954	6.9661
ANPEP	4.05164	4.8907	4.62654	4.97961	4.39639	4.4184	6.1051	7.29644	6.86119	7.13788	5.72449	6.19138	6.65325	4.31928	7.55136	5.39958	4.96504	4.94684	4.83987	5.78398	4.79609	6.05878	6.28902	4.58546	6.26122	4.35444	6.72546	7.40607	6.25779	4.82661	4.63977	6.09716	6.64115	6.15025
APLP1	6.35493	7.51376	7.05055	6.76622	6.07762	6.46255	6.61428	6.35452	6.54938	6.19899	6.49547	6.40352	6.10027	7.11457	6.34481	6.25133	6.37172	6.34869	7.23904	6.48331	6.36604	7.34942	6.48875	6.74649	6.08793	6.04675	7.09779	5.85169	6.2655	6.41966	7.31516	5.97747	7.10258	6.00806
AREG	3.44406	3.9602	3.6542	5.16717	3.55912	3.60118	3.76075	3.54919	3.65412	4.07567	3.67792	3.47437	3.49719	3.55853	3.44514	3.60826	4.06439	3.49287	3.69421	3.70967	3.8775	3.39968	3.67203	3.56719	3.49541	3.48682	3.49946	3.42122	3.41618	3.66221	3.47266	3.40718	3.60923	3.41916
BASP1	11.1841	8.56329	9.60634	5.8253	7.16671	8.5214	9.4926	9.85501	10.688	9.42105	10.3603	10.7843	10.3324	9.94082	10.2027	8.71204	9.49674	11.7745	8.72797	10.3032	10.5596	11.1018	9.28237	11.4658	7.44978	10.972	12.0705	9.19978	10.4742	9.73193	10.996	10.7956	6.41854	11.1079
BDNF	4.05399	4.15135	5.01586	4.16299	4.29778	4.9828	5.26802	4.6178	4.71445	5.424	4.85487	6.63945	4.73476	4.12428	4.8848	4.58064	4.36526	4.22749	4.37078	4.1754	4.20462	4.88074	4.18653	4.16617	4.46329	4.18747	5.08203	5.12006	4.22356	4.33226	4.14563	3.94449	4.05079	4.3465
BGN	7.90227	8.33636	8.70633	5.55395	7.73691	8.49194	8.43395	8.70556	7.94567	8.99648	8.91404	9.43139	7.99072	9.49807	9.30642	8.48164	9.8574	8.79589	9.36667	8.45219	9.57483	8.43397	8.53039	9.88053	7.66732	9.26436	8.88097	8.45029	9.04567	9.28723	8.9164	8.92431	9.61849	10.0144
BMP1	6.68665	7.01662	8.24949	6.72449	7.00584	7.60362	7.30206	7.43452	7.14917	7.37545	6.70921	7.18738	8.12421	6.88527	7.78301	7.347	7.07305	7.26268	7.2125	7.7164	7.05891	7.8085	7.19377	7.55016	7.63961	7.12892	7.51385	7.97721	7.82535	8.03144	7.64594	8.12473	7.14038	7.33657
CADM1	6.62308	6.48299	8.61157	7.18914	9.24957	9.62704	8.63205	9.01991	9.38704	6.74175	8.58294	8.49323	9.26112	7.86137	8.69236	9.6622	7.77328	9.50072	7.91386	9.13601	7.96257	9.46617	6.45474	9.30132	8.25224	9.17678	9.65614	9.08912	8.36873	7.69246	8.247	8.398	7.37304	9.27014
CALD1	6.57239	6.02908	5.6957	6.1986	7.23994	5.65649	6.06316	5.73358	6.14104	6.22459	5.81765	7.30085	6.42423	5.86172	6.25999	6.69214	6.25935	7.56637	6.38178	6.42219	7.05697	6.67478	6.35578	6.34866	6.55073	6.90218	6.12693	6.95781	7.43344	6.62563	6.90158	8.10027	7.50287	8.25794
CALU	7.76934	7.38268	7.33535	8.45544	8.1359	8.67436	7.05443	8.19517	7.83914	6.9468	7.80189	9.05305	8.70727	7.70358	7.60777	9.05262	7.14827	9.67621	7.74176	9.09308	7.2892	9.3222	7.19469	7.81513	8.98051	8.99271	8.18056	9.60661	9.85767	8.92595	8.52892	9.56188	8.55316	10.0168
CAP2	6.80517	5.48741	4.76969	4.7267	8.12808	4.81709	5.02783	4.42121	4.57901	5.20408	4.32244	4.62735	4.51855	4.60601	5.11803	4.75747	5.24729	4.49432	4.89293	5.15196	5.26365	5.09834	4.92452	5.05857	4.36524	4.73777	4.61656	4.58975	6.06943	4.88373	4.97966	5.2606	5.60253	6.23524
CAPG	5.49947	4.48813	5.14164	8.39902	5.87262	5.94142	5.29791	6.75424	6.54439	6.20442	5.57759	6.58528	6.98414	6.50305	7.18584	6.59082	6.54471	5.92183	5.81484	6.9345	6.20443	5.98285	7.56315	6.8783	6.85953	7.0139	6.18671	7.63723	6.58515	6.68947	6.76552	7.1211	8.61308	6.69022
CD44	5.54412	6.17352	6.12023	8.2614	5.93535	5.7747	6.3796	5.98463	5.95675	6.46763	6.39719	6.31592	6.74548	5.99208	6.45293	7.63227	6.27761	6.7581	6.04536	6.2759	6.10638	5.54611	6.79306	6.4942	6.36693	5.90004	6.16838	6.88823	6.98718	6.54206	6.03018	7.62437	8.74859	7.32614
CD59	8.39263	7.51652	7.46907	9.8387	7.94475	7.57129	8.25635	9.03527	8.25673	7.96689	8.42211	8.3171	8.86214	7.90007	8.36371	8.57557	8.441	8.47306	7.70507	8.50598	8.79773	8.43539	8.60319	8.41086	8.50956	8.62574	8.42333	9.62063	8.2674	8.92079	7.80548	8.18654	9.94657	8.83132
CDH11	7.91454	7.21281	6.8072	6.39196	6.03662	9.60392	6.48167	9.00686	8.01432	6.55789	7.97358	8.88123	8.72326	9.22258	9.17658	8.69444	7.54826	9.95223	7.95489	9.22265	8.10767	9.32836	7.62084	8.91878	10.225	9.35063	8.44991	9.61098	9.27505	9.53904	10.0385	9.31397	8.0416	9.72687
CDH2	7.66368	7.37039	8.42178	8.26707	8.26349	8.2688	7.87857	8.56645	7.78153	7.36493	8.09319	8.36263	7.83764	7.35228	8.28657	7.4318	7.6708	7.27242	7.26761	8.54191	7.10281	8.41501	6.85783	8.52552	7.65678	7.47923	9.28353	7.13275	6.55999	6.93615	8.2653	7.07988	6.42742	7.62769
CDH6	4.98459	5.5901	4.99758	6.62981	4.91475	5.16156	5.25294	4.91565	4.97133	5.55239	5.25781	4.97373	5.13663	5.28683	5.1725	4.96953	5.44938	5.0067	5.32906	5.0077	5.33367	4.85594	5.39368	4.87345	4.9149	5.07093	5.03276	5.11494	4.98826	5.25192	4.89073	4.78999	4.99348	4.90619
COL11A1	8.56763	10.868	11.0595	7.36101	11.329	10.2643	11.1063	6.10406	11.5387	10.874	10.0181	11.165	9.41509	11.9324	5.58964	10.7682	10.831	8.60953	11.4348	10.9503	11.5843	11.7945	9.96665	12.0646	11.1553	10.1338	9.69062	9.36423	10.3307	10.0837	10.1664	9.74764	9.8657	11.1456
COL16A1	7.99401	9.70172	9.02181	4.61651	5.35593	6.04515	8.68332	9.01725	6.95018	9.24667	8.5216	6.39775	8.52301	10.04	9.83887	7.34664	10.2638	9.77134	10.2287	9.21357	10.6317	8.8125	9.45862	10.1302	8.06007	9.33926	9.16041	8.14894	9.81349	8.27352	9.88141	8.7722	8.06161	8.19801
COL1A1	9.11562	6.83056	9.5805	6.3786	8.7025	9.90727	8.06233	9.02198	8.83917	7.99103	8.32688	9.99618	10.1439	8.86815	9.07661	9.68143	8.58267	10.612	9.24746	10.1244	8.51203	8.87862	8.59085	9.50796	9.81925	10.0691	9.00393	10.4234	10.469	10.3957	9.87329	9.87418	8.9104	10.4902
COL1A2	11.6762	13.0652	12.7897	10.1771	11.089	13.0966	12.33	13.2885	12.315	12.5448	12.8217	12.6749	13.3554	12.9936	12.7315	13.1104	12.9775	13.7154	13.1997	13.3216	12.946	12.7179	12.4005	12.8588	13.0652	13.0371	13.2769	13.2963	13.358	13.3444	13.1565	12.915	12.59	13.2009
COL3A1	11.5572	9.63876	9.10232	9.63101	10.3706	8.88337	10.6868	10.7372	9.60663	10.4499	12.189	10.429	12.1031	12.1714	11.1435	11.9358	11.5577	12.5389	11.996	12.3008	11.9788	11.7918	11.1777	11.8763	11.9806	12.2079	12.1619	11.2355	12.7209	12.4884	12.2525	12.3567	10.6798	12.5472
COL4A1	8.64933	8.45736	8.29838	8.78008	8.8076	9.20099	9.25675	8.88936	8.97794	8.63246	10.2687	9.56579	9.89032	9.75702	9.99632	10.2441	8.75525	9.40137	8.0147	9.0268	8.65565	9.4097	9.58419	8.88969	10.0313	10.1218	10.1127	10.6826	8.5436	10.9296	9.4731	10.0651	9.08744	10.2203
COL4A2	8.13627	6.84599	6.81742	7.78461	8.06597	8.6017	7.83073	7.21795	8.17803	8.06303	7.58532	8.6995	8.89043	8.42348	8.94199	9.6201	7.54323	8.4248	7.17614	8.08492	7.72719	8.49016	8.66096	8.32011	9.38928	9.07119	8.54197	9.71711	7.78883	10.6312	8.73201	9.51377	8.4292	9.35048
COL5A1	8.36696	10.5325	9.65217	7.17028	7.79575	9.11004	8.64813	10.1796	8.76896	8.88234	10.332	8.35811	10.3907	9.48939	9.36848	8.64241	10.2205	10.2668	9.31473	10.4676	9.91322	9.84818	8.73422	10.8248	9.63377	9.67477	9.94291	10.3674	10.8427	10.413	9.78794	10.928	8.40662	11.6115
COL5A2	9.02926	9.27567	10.8193	8.47044	10.7894	11.5637	9.60772	10.9958	10.2705	8.1479	11.4171	11.3542	10.401	10.6329	10.6635	11.2863	9.51537	10.8194	10.3498	11.1463	10.6451	11.2479	9.4429	10.5236	10.7875	11.0301	11.3496	11.0317	10.8097	10.7863	10.8054	10.808	10.8745	11.1874
COL5A3	7.49447	7.30091	7.32036	6.55595	7.43579	8.19233	8.22473	6.8372	6.81366	7.88433	7.84355	7.56708	7.47121	8.4923	8.34369	7.18833	7.65178	7.27912	7.83826	7.67615	7.13944	8.53148	8.31571	7.70767	6.88697	7.17329	7.70563	7.53196	7.55135	8.21984	7.83621	7.47725	6.89419	7.59242
COL6A2	7.48893	5.38028	5.39226	6.81371	7.47665	6.04381	5.52898	7.82287	7.54461	6.49702	5.36276	7.2633	7.3118	8.23881	8.22417	7.61286	6.52735	8.80272	7.76285	7.78743	7.94172	8.34503	7.81822	9.81063	7.97073	8.89842	7.68673	7.90545	9.00836	9.55102	8.0898	9.49749	8.60828	9.01285
COL6A3	10.8709	11.1694	9.5	8.98488	9.4415	9.98135	11.1303	10.9703	9.37395	10.5401	11.5851	10.1401	10.9593	11.3523	11.098	11.0719	11.5124	11.6411	11.2988	11.3699	11.6237	10.2291	10.3928	11.1628	10.5571	11.8236	11.607	11.7091	11.4847	12.3296	11.4674	12.008	11.8087	11.8465
COL7A1	5.95343	6.45016	6.54958	7.28503	6.43303	6.1999	7.21401	6.28761	6.42349	7.72574	5.95758	5.8458	6.20985	6.22538	6.59576	5.81832	7.22578	6.523	6.87982	6.38344	6.47362	6.01102	6.74729	6.67831	5.96761	6.22965	6.73002	6.74521	6.8659	6.55352	6.23164	7.12096	6.41739	7.1165
COL8A2	5.67131	5.99987	6.97368	5.75384	5.53355	5.55734	5.84124	5.75066	5.66469	6.20004	6.10805	6.26045	6.19208	8.31736	5.5633	5.74594	7.08975	7.38966	6.99413	7.27908	7.98967	7.34387	7.57225	9.03241	6.96422	7.87105	6.98328	5.74553	8.74399	7.17538	7.98274	6.92589	8.46736	8.00739
COMP	6.28178	5.20825	5.02668	4.83639	4.90445	5.07087	5.27301	4.96243	4.829	5.69992	5.90842	4.91627	6.8582	8.95928	4.62439	4.74528	9.65808	7.57519	8.14011	7.84592	9.28389	4.92067	5.14276	9.28124	7.72528	7.07597	9.88113	4.57533	5.92531	7.85536	10.5751	5.68371	12.3555	4.92941
COPA	6.77974	5.46574	5.5198	5.89566	7.28038	6.25905	4.91595	6.04847	6.2873	5.37467	5.43846	6.39544	6.31347	6.24608	6.37187	6.57082	5.45719	6.90427	5.70981	6.36833	6.05521	6.41159	5.68982	6.26193	7.58349	6.76163	6.2811	7.13461	7.50921	6.67239	6.35939	7.13537	6.38125	7.59877
CRLF1	4.72174	5.28501	5.11385	5.56999	4.78689	4.86731	5.01324	4.70968	4.6227	5.09101	5.00323	4.92215	4.82195	5.35025	4.61424	4.68974	5.30198	4.52928	5.33959	4.67883	4.96838	4.54656	5.11587	4.91763	4.63298	4.47202	5.07151	4.5881	4.723	4.78131	5.91643	4.38549	6.55934	4.52775
CTGF	7.18224	5.27437	4.74002	7.65433	7.61397	4.72288	7.19568	5.52894	7.45971	7.24547	6.64776	9.21534	7.54128	6.07984	6.49523	9.14787	6.52149	6.46607	6.41056	6.91784	8.07928	6.50676	7.1971	7.76568	7.47464	7.59756	7.47465	8.27726	7.47986	8.28177	7.38092	8.99942	10.8237	9.39158
CXCL1	4.28625	4.77652	4.35218	4.09043	4.27419	4.1965	5.13249	4.14994	4.38505	4.77855	5.25909	4.31059	4.24314	4.19538	4.30503	4.10646	4.99899	4.14337	4.42709	4.11436	4.58031	4.0658	6.13157	4.22054	4.20758	4.22006	4.30584	4.34384	4.2278	4.47594	4.26465	5.09481	4.22256	4.82448
CXCL12	7.05031	6.44676	5.93275	8.29231	5.91451	6.11936	6.10105	6.02794	5.83475	7.16221	7.32872	6.04633	6.13184	7.08541	6.51659	5.99726	6.50678	6.21864	6.25456	6.11266	6.67421	7.47461	7.49623	6.84857	6.27267	6.48692	6.46243	6.38	8.4766	8.1919	6.57787	6.72873	9.3853	6.91594
CXCL6	3.7896	4.22094	3.92005	5.50521	3.66603	3.78514	4.02255	3.61659	3.79969	3.92051	4.40631	3.64875	3.59652	3.71108	3.69774	3.55059	3.81635	3.54463	3.94552	3.67186	3.86678	3.70614	6.19402	3.84074	3.7293	3.68205	3.78147	3.68236	3.5404	3.75286	3.53788	5.41234	3.70408	4.49463
CYR61	5.58005	5.7799	6.96239	5.31713	7.50878	7.23184	6.55824	6.28355	8.2575	7.18771	7.05033	10.4912	7.42271	6.32101	6.93623	9.01752	7.47465	7.52704	5.98211	7.95474	7.32302	7.75927	8.07142	6.67096	8.07085	8.26496	7.78906	8.14787	7.89	7.06219	8.24347	8.14891	10.8625	10.154
DCN	8.69721	8.10881	8.75879	6.52677	9.50732	8.73845	7.60599	9.88268	9.09712	8.18336	9.22958	9.20967	10.4816	9.93336	8.89269	8.66713	9.49024	11.5941	10.8501	10.1585	8.42198	10.779	10.0195	9.67302	10.1343	10.9861	9.98591	8.93267	9.91289	10.6236	10.4196	8.76922	10.7987	10.1746
DKK1	5.04274	6.9013	6.21537	6.78511	6.18078	10.752	5.2821	5.38577	6.10372	5.72687	8.17398	11.402	5.36213	6.31043	6.09215	9.70346	6.18258	5.26777	5.85854	5.4874	5.23292	6.46382	5.28743	5.21707	5.23624	5.95862	8.24077	5.13296	5.2447	5.57804	5.87243	4.91459	10.0189	6.87648
DPYSL3	6.16928	6.67644	6.03726	7.23479	5.40548	7.35099	6.70382	6.69319	5.98752	6.23379	6.31108	5.3811	7.82688	6.54861	6.95944	6.15642	7.01067	7.97046	6.99542	6.41818	7.19713	5.97049	7.05113	7.26371	6.62785	6.91772	6.75497	6.98695	7.67386	6.92614	7.36954	8.39355	7.68874	7.80533
DST	6.20954	6.4333	6.31657	6.4063	5.73616	6.77177	5.78776	6.00762	5.89022	5.77813	6.21913	6.03312	5.99173	5.9186	6.00462	5.72118	5.96099	6.26014	6.02774	6.03688	6.36884	5.98983	5.9735	5.9756	5.70981	6.10363	6.29584	5.67965	6.24998	5.55946	5.87596	6.41847	6.40765	6.2643
ECM1	7.09564	7.172	6.84525	7.36582	7.20544	7.27244	7.41942	7.88957	7.67591	7.84266	7.94544	7.65579	7.85648	7.12668	7.85782	7.902	7.97948	7.18334	7.9312	7.66762	6.94061	8.22982	8.32105	8.52419	7.55332	7.99605	8.64376	8.78596	8.35713	7.56338	8.19381	8.42437	8.64547	9.3849
ECM2	5.46899	8.38419	7.04732	4.94267	5.84801	5.05942	6.25852	5.26769	5.43742	7.29219	7.45507	5.32364	7.25304	7.22736	5.74542	6.19107	7.1548	6.63698	6.74686	8.09405	7.69215	6.83521	6.86757	7.42718	6.47215	7.17436	6.90084	5.25222	8.42804	7.65078	6.6945	8.52083	6.73633	5.38555
EDIL3	4.43627	4.62874	4.53407	4.30477	6.34859	4.59341	4.84658	4.20517	4.67205	5.56889	4.43272	4.63261	4.21477	4.51449	4.02582	4.47333	4.68115	5.21704	4.82234	4.22102	5.2046	4.07198	4.25085	4.65472	6.42669	4.32668	4.40399	6.31072	5.1967	5.9534	4.57656	5.43216	9.45951	5.02397
EFEMP2	6.44749	7.95819	8.50664	6.80374	7.16541	7.91657	7.64417	8.57701	8.5796	8.08628	8.37388	7.77906	7.62261	7.49949	7.25751	8.05337	9.60046	7.9827	8.52117	7.70495	7.61123	7.93714	7.87325	8.39485	8.02289	7.34747	8.44013	7.30348	7.29465	8.28051	8.38869	7.79994	8.2523	8.80345
ELN	6.0247	5.9939	5.60883	5.69148	5.62518	6.15277	5.68877	5.49127	5.44405	6.06203	5.92702	5.88006	6.14167	7.19044	5.7008	5.8851	6.0118	6.40552	6.24398	6.34932	5.71673	5.48929	6.04889	6.95871	6.11465	6.52891	6.26914	5.84115	5.7712	7.0541	6.3085	6.02067	7.19587	5.75461
EMP3	5.6584	6.52791	8.13478	9.97129	8.59031	8.71153	7.93651	9.01955	10.4573	7.75577	7.65349	8.81418	9.07812	8.85031	8.76868	7.90525	7.89988	8.12266	9.68054	8.75853	9.88629	9.91821	8.70112	9.94633	9.36774	8.63291	9.77005	8.9327	8.432	8.91831	9.20481	9.10946	10.1072	9.0174
ENO2	6.89975	5.96955	8.04029	7.63725	7.00008	5.38529	6.51538	6.4006	7.06184	5.84309	7.59006	7.15814	5.49296	6.78316	6.1391	6.07263	6.81123	7.4984	7.22196	6.86738	6.30689	6.76598	6.43371	8.61258	6.1775	6.74205	7.31597	4.91895	6.40033	5.29781	7.62824	8.03202	7.19752	9.13237
FAP	7.17407	6.32992	6.02476	5.62017	6.24383	5.91241	6.49758	6.76595	7.31497	7.01573	7.14858	6.37692	7.30422	6.42699	6.58313	6.75102	6.54155	7.38418	6.1965	7.4067	7.82563	6.40156	6.973	7.5799	8.12331	7.49956	6.73219	7.00058	9.66229	8.9319	7.72007	9.26507	10.1997	9.74205
FAS	4.64008	5.71851	4.94432	5.76512	4.7398	4.5924	4.9743	4.63407	5.01069	5.12848	4.89413	5.00266	5.12455	5.27599	4.98055	4.69623	5.15567	5.64463	5.12531	5.34031	5.62945	4.66901	5.30304	5.09494	4.92278	7.01004	4.84485	5.33214	6.10869	5.20276	5.4013	6.04528	5.95318	6.45212
FBLN1	6.41152	7.30094	6.51227	6.84592	6.95648	6.46663	7.2583	6.66271	6.90785	7.36533	6.89786	6.07907	6.74597	7.93157	6.31983	6.59909	7.90338	6.84328	7.06288	6.46604	7.69956	6.59862	7.64198	7.68253	7.80352	7.64002	7.32203	6.66303	6.94447	7.87794	7.94464	7.56756	7.54476	6.88074
FBLN2	5.34516	5.72007	5.25004	7.56193	5.54569	5.17496	6.11574	6.76685	6.26787	6.35831	8.44032	5.12885	5.44113	6.59923	5.95257	5.07955	7.00689	5.20139	5.46036	4.77645	5.70798	8.74165	5.89395	6.99275	6.3064	5.67386	8.84661	5.32784	5.29459	6.80699	6.58388	5.69035	5.25975	5.99354
FBLN5	5.51579	6.24954	6.13799	5.34861	5.62782	5.65521	5.57696	5.76025	5.90975	5.88906	5.67714	5.56888	5.92911	5.72112	5.91947	5.94521	5.75864	5.88208	6.00011	6.21901	5.53292	7.23875	5.78768	6.18596	6.24041	6.24744	6.00814	5.74523	6.29254	6.63753	6.40194	5.36381	8.03685	6.95661
FBN1	7.55051	7.13149	6.70673	6.94943	9.01753	8.11694	7.16866	7.08603	6.91595	7.89286	7.26008	7.41344	8.24046	8.08993	7.98301	8.14594	7.66753	7.65133	7.76334	8.64783	8.5364	8.87827	7.99015	7.89266	8.61748	8.64215	7.72907	9.16101	9.93344	9.27409	8.86485	10.2692	10.5043	10.3598
FBN2	4.10102	5.32936	5.35153	5.64149	5.33854	5.21425	5.60921	4.22314	6.05239	4.73254	7.023	6.06007	6.36995	5.6184	5.11698	5.34964	4.72659	4.53037	4.77865	4.29113	4.5422	5.19459	4.37885	5.32459	6.07554	4.99021	6.14026	5.84533	5.37837	5.20465	6.06227	6.10502	4.20131	6.88004
FERMT2	6.9631	6.31168	6.23026	6.81931	7.39685	7.25662	6.14094	6.88611	6.47275	5.92026	6.75745	7.19893	6.36263	6.74338	7.17144	7.28494	6.94784	7.88517	7.56526	6.9587	7.39023	7.87842	6.35735	7.24205	7.65832	7.49677	7.22022	7.38395	6.9394	6.85799	7.5506	8.10762	6.73026	7.98491
FGF2	3.85585	4.56857	4.14913	3.85812	4.36587	3.93179	4.12951	3.96664	4.01817	4.44048	4.16074	3.75826	3.87174	4.43487	3.83773	3.76449	3.93847	3.7613	4.06787	3.97415	4.19263	3.91037	4.13156	3.94641	3.79866	3.83061	3.82682	3.77614	3.80269	4.04137	3.74933	3.70933	4.22831	4.2606
FLNA	7.3707	6.54009	7.23043	7.24048	8.98331	8.74279	6.83773	8.59198	8.61244	7.13408	6.74671	9.17485	7.85912	7.48425	9.10845	8.98362	7.39967	9.30216	8.28717	8.70008	7.52488	9.09692	8.52276	9.22143	7.90697	8.99908	8.57839	8.92628	9.48845	8.86001	9.38609	10.782	8.98389	9.94532
FMOD	6.03006	6.79076	6.77691	5.95056	5.89638	5.98233	6.64662	6.61379	7.54409	7.57651	7.48189	6.27118	7.45789	9.27819	6.00439	7.92552	7.64802	6.73915	7.90491	7.12304	7.21667	8.08744	7.26222	8.90509	7.58688	8.17899	9.71318	6.42673	6.38064	7.89693	7.40297	5.96401	7.07413	6.28606
FN1	9.4008	9.43075	8.66933	10.887	9.23507	9.68781	9.98577	9.70146	9.61838	9.51192	9.87284	10.1444	9.42552	9.56084	9.61895	10.7105	9.97087	9.07426	9.74833	9.58022	9.68155	9.90242	9.86791	9.60401	9.56332	9.887	9.87004	10.6235	11.1763	10.3934	10.0111	10.5235	11.7962	11.3366
FOXC2	4.5335	5.08766	4.62603	4.81473	4.47595	4.87787	4.86818	4.65977	4.68314	5.0282	4.78857	4.68697	4.68667	4.78514	4.66846	4.98575	4.5702	4.55134	5.28856	4.4131	4.69332	4.60428	4.84172	4.38355	4.80445	4.28148	4.45391	5.34364	4.61918	5.05997	4.70283	4.56708	4.73115	4.61711
FSTL1	8.66124	9.29712	8.93498	10.7889	10.0141	11.2616	9.51912	11.4817	10.4181	9.08522	10.4654	10.4505	10.4608	10.8554	10.83	10.3537	9.41189	9.75297	9.32389	10.6218	10.4159	11.6457	9.73185	10.3102	10.5072	11.1443	11.0323	11.1745	10.1459	10.8238	10.6044	11.0861	11.6405	11.4885
FSTL3	5.74146	6.20759	6.59013	5.7014	5.76631	6.0474	6.50878	5.70237	5.76218	6.61628	5.92841	5.61733	5.75771	6.09001	5.66878	5.65972	6.46238	5.76553	6.72429	5.8925	5.88489	5.73653	6.03187	5.60273	5.68313	5.6962	6.092	5.51117	5.85932	6.12907	5.75982	5.88418	5.96533	6.88679
FUCA1	4.83803	7.22816	7.77103	8.56932	7.68708	7.3347	8.21091	7.67243	7.14033	8.70969	8.27965	6.97846	7.9971	7.47612	7.86892	6.81513	8.2755	6.97053	6.93415	7.1041	7.28399	7.82384	9.01	7.97763	8.48951	7.6503	7.656	9.3351	6.50926	8.19823	6.90277	7.07161	9.25093	7.25978
GADD45A	7.91251	7.12603	6.74059	7.42138	6.91031	6.54469	6.73736	6.38919	6.99938	7.09955	7.07812	7.02659	6.78754	7.26717	7.10906	7.39311	7.16808	6.94582	6.95141	6.81461	8.28605	7.93587	7.42891	8.4524	7.49358	8.20199	6.9381	7.2796	7.68667	7.18379	7.7803	7.83813	7.9447	9.10793
GADD45B	5.64965	7.10847	7.26359	7.63734	6.40745	6.69494	6.94549	6.9489	6.94286	7.26237	7.59993	7.99654	6.44865	6.30071	6.37959	7.8489	7.53012	6.43753	6.81667	6.56417	6.58836	6.89897	6.81984	6.98533	6.8223	7.6524	7.79295	6.58161	6.24893	6.47662	6.53249	6.19722	6.78262	7.14722
GAS1	7.87804	5.38607	5.32573	4.69781	4.73288	6.07384	5.29664	6.54681	5.87572	5.73991	5.9789	4.82983	5.81387	6.07738	5.89912	5.9238	5.69566	5.68843	5.43069	6.16934	5.15506	5.7016	6.75523	6.08376	5.8101	6.06422	6.1041	5.1284	7.86043	6.7977	5.48615	8.32503	5.20163	9.49153
GEM	5.3698	5.63486	5.5709	5.74487	5.23477	5.45067	5.27289	4.85309	4.88261	5.76709	6.1146	5.97292	5.41632	6.96401	5.97961	7.54813	5.60966	5.23385	5.76164	5.76481	5.68386	6.72005	5.43581	5.38453	4.58976	5.98258	5.99502	5.55234	6.91437	6.5435	6.02865	9.36807	6.60742	8.1339
GJA1	6.40851	12.3416	11.4418	9.65144	11.2047	12.1517	10.0122	11.8715	11.5718	10.2065	11.7073	12.2879	11.9544	11.3497	12.1087	10.9051	11.2911	12.7101	12.0566	12.4554	11.35	11.7287	10.4219	11.3382	11.4118	11.8949	12.3939	11.2914	12.3789	11.2965	12.0837	11.5288	9.97062	11.7674
GLIPR1	5.15387	6.18681	5.36556	6.92432	5.88893	5.85621	5.9559	5.99484	5.93769	6.11708	6.12384	6.38309	6.20198	5.57352	6.9372	6.49323	6.01906	5.3636	5.70697	5.89489	6.21191	6.11359	6.28437	5.72732	7.65654	6.29776	5.28402	7.6582	7.49636	6.8736	6.22709	8.50105	7.62441	6.36894
GPC1	6.58729	7.3215	7.34869	5.9209	6.77314	7.7258	7.36057	7.01737	6.85948	7.01799	6.59095	6.7736	6.96767	7.61183	6.48847	7.2593	7.53926	6.73212	8.23981	7.84263	7.73263	8.06275	6.83867	7.11429	6.65405	7.79502	7.56536	7.87527	6.62452	7.42166	7.24772	6.25199	7.11528	6.84111
GPX7	6.44015	6.09046	7.85335	6.30972	6.8011	7.4257	5.77806	8.45478	7.11084	5.31822	7.38971	6.94549	7.62222	6.81671	7.83348	8.30228	6.04897	8.19692	7.00358	7.67502	6.28235	8.87804	6.51784	8.0562	6.85295	8.62806	7.72372	7.80034	7.27222	6.96323	8.40183	7.22605	6.94543	7.19836
GREM1	7.14895	5.03497	4.38784	4.43832	4.01711	4.02738	4.7736	5.41543	4.75341	4.84471	5.64766	4.7772	4.32298	5.85596	6.8124	4.07887	5.44139	4.11125	4.31182	6.32425	4.18438	4.28398	6.81618	5.11786	4.50274	4.12459	5.1267	5.59833	7.58411	4.62746	7.11722	6.33255	4.54003	9.7039
HTRA1	6.85191	8.49182	8.14471	12.0257	8.03936	7.72367	9.38724	9.19854	8.26897	9.25295	10.0559	7.68929	9.74807	9.47918	9.30429	9.33892	10.5191	9.61477	9.76673	9.48649	10.2266	9.26221	9.54446	9.72465	9.74086	9.93343	9.90801	9.69714	10.2596	9.99333	9.87868	9.79662	11.5071	10.0831
ID2	4.98053	5.10294	6.05497	8.81772	6.944	7.81171	5.79704	8.11128	7.71486	6.35731	6.19052	7.59876	7.28509	6.94766	7.22902	7.70121	6.63867	8.19126	5.44072	7.68308	6.29804	6.66117	6.09659	6.96593	8.25613	7.68253	7.91417	7.70823	6.63335	7.00453	8.05795	7.59818	7.32567	6.61787
IGFBP2	8.17542	4.98389	6.15108	5.22719	6.66887	5.85135	5.24572	6.56078	5.33205	4.99015	5.15734	8.59366	5.88423	5.44568	5.3802	8.35857	5.06884	5.76628	5.95138	6.70732	5.4916	7.60252	6.60002	6.58442	5.32024	5.09162	7.97901	7.75122	5.26608	5.84105	8.87088	5.53388	9.71447	5.9074
IGFBP3	6.86893	6.94015	6.28757	8.40018	7.78563	7.45202	7.45582	7.29371	6.52294	7.56999	7.2655	7.37169	8.4485	8.54782	8.07365	8.50682	7.98484	7.58684	7.74122	8.29951	8.44556	9.27092	8.29148	8.87193	8.47072	8.98559	7.6259	8.65248	9.548	10.3381	9.18463	9.08022	9.66775	9.26284
IGFBP4	8.21505	6.95584	7.55644	8.8573	7.70515	7.77069	8.25433	8.40446	8.46528	9.07942	9.49663	7.79267	8.62837	8.71459	8.8719	8.85029	9.93053	8.09187	8.27378	8.97515	8.88787	8.6946	9.82567	8.59516	8.44304	8.3125	8.85391	8.31723	8.20665	9.94684	9.08488	10.0832	9.74301	9.35633
IL15	3.96433	4.33122	4.18611	4.0527	3.95074	4.33969	4.12409	3.97394	4.05744	4.26634	4.10016	4.09597	4.01891	4.21318	4.29598	4.04363	4.29271	3.99653	3.98395	4.01391	4.36444	4.08359	4.48195	4.07541	3.96935	4.01455	4.228	4.12449	4.04936	4.2679	3.9006	4.0477	4.18382	4.27784
IL32	6.33739	5.78916	5.7099	5.39235	7.25985	5.56096	6.00955	5.89903	5.63198	6.17984	5.88915	5.4644	6.31633	6.1455	6.21265	5.29964	5.77352	5.21081	5.64501	6.34462	5.92668	5.391	7.17754	5.27535	5.49561	5.65349	7.09278	6.44021	6.14394	6.22819	6.19306	5.94731	6.27942	6.61168
IL6	4.50347	4.54108	4.59167	4.26584	4.20303	4.27299	5.0622	4.46983	4.42191	5.5084	5.15501	4.30034	4.26027	4.42878	4.00228	4.3454	4.63159	4.10648	4.60909	4.18153	4.41166	4.35422	4.81407	4.31086	4.28653	4.19928	4.65225	4.36642	4.16836	4.36078	3.98525	4.42929	4.8064	4.77496
INHBA	4.54069	4.3493	4.44402	5.22988	4.60204	4.21679	4.56003	4.84939	5.01031	5.00326	4.74225	4.57507	4.43074	5.18757	4.65987	5.25833	6.11603	4.68129	5.44544	4.67022	6.17831	4.32964	5.68466	5.21385	4.98079	4.87247	4.71256	4.86422	4.71094	4.91255	5.17785	5.40909	4.56132	5.7215
ITGA2	4.39942	4.93699	5.21898	5.15061	4.70042	4.90606	5.04899	4.77494	5.07504	5.21967	4.63103	4.8503	4.59987	4.49469	4.8584	5.28755	4.38355	4.51998	4.69221	4.72183	4.54442	4.53137	4.5358	4.65302	5.24874	4.38669	4.48615	4.84737	4.49684	5.77103	4.36306	4.46059	5.03061	4.57734
ITGA5	7.28911	7.05201	7.58729	8.17748	7.2245	7.98203	8.24838	8.23142	8.5246	8.42955	8.33268	8.27653	8.14193	7.88614	8.62444	8.46812	8.12046	7.80712	7.95425	8.29566	8.04827	8.29674	8.77665	7.63083	8.28331	7.6942	8.46855	8.49385	8.3251	8.74823	8.34572	9.6445	8.00909	9.0319
ITGAV	7.93936	8.61457	9.67215	9.60376	7.56918	8.56363	9.61654	9.95871	8.58497	9.02039	9.26738	9.444	10.2961	9.58511	10.4371	9.75189	9.37542	9.57657	8.62751	9.92194	9.09213	9.13501	9.53517	9.48814	9.61158	9.54111	9.84424	10.3231	9.83888	9.20084	9.51625	10.9735	10.5367	10.1074
ITGB1	5.00831	5.1759	4.96451	5.00841	4.8926	4.9656	5.02434	5.11728	5.07937	4.7003	5.26671	5.10898	5.12946	4.91	5.12307	5.12385	5.02871	5.14248	4.78519	5.06902	5.15048	4.96	5.15275	5.04222	5.24101	5.08168	5.07014	5.10253	5.12386	5.04844	5.0059	5.14505	5.36613	5.23092
ITGB3	4.64037	5.19863	4.89862	4.64526	4.62343	4.89423	5.19304	5.1276	5.01415	5.30663	4.67711	5.06848	4.87992	4.64609	5.28908	4.7759	4.82843	4.72733	4.99822	4.73167	4.83499	4.80965	5.00797	4.61947	5.59324	4.51292	4.72179	5.65709	4.77118	5.23774	4.63345	4.92944	5.91872	4.67128
ITGB5	6.52547	7.89109	6.63821	6.85646	6.1845	6.55983	7.17169	7.59322	6.98465	6.84935	7.16825	6.81656	7.26733	6.83631	7.22333	6.47138	8.49519	7.36187	7.58506	7.43775	7.84147	6.92368	7.25256	6.72081	6.96768	7.22419	7.17724	6.92424	7.43671	7.03416	6.91331	6.85565	8.10351	7.1929
JUN	5.97751	6.42059	5.58346	7.03813	6.13614	5.41737	6.70229	5.86219	5.63051	6.60595	5.70945	5.66152	5.87179	6.64165	6.36159	6.28608	6.74092	6.21631	6.96256	6.9881	6.4607	6.01609	6.60105	7.2178	6.17995	6.22034	5.73055	6.14295	7.36434	6.02784	7.26846	7.81356	6.18722	7.62126
LAMA1	4.66662	5.42283	5.02042	4.5095	4.50357	5.09837	5.02682	4.69789	4.71212	5.25354	5.12858	4.73439	4.70131	4.82665	4.75396	4.75084	4.90226	4.52949	5.43187	4.36377	5.00282	4.92806	5.17766	4.70266	4.70063	4.38229	4.61531	4.38508	4.69732	5.48586	4.74459	4.33239	4.81623	4.71385
LAMA2	4.51439	4.49364	4.35743	4.27753	4.15356	4.27659	4.33525	4.20241	4.24415	4.5	4.442	4.20048	4.18167	4.39957	4.21337	4.3691	4.55646	4.20009	4.41971	4.13716	4.72137	4.75067	4.36815	4.2812	4.06034	4.20989	4.55477	4.22968	4.28986	4.30631	5.27697	4.26254	4.15688	5.63791
LAMA3	5.24792	5.33453	5.79071	5.2674	4.89791	5.68719	5.9282	5.04854	5.72321	5.67867	5.9189	5.42105	5.23239	5.84213	5.33192	5.39867	5.26152	5.45046	5.86521	5.21835	5.43622	5.38414	5.9693	5.84367	4.96652	4.9282	6.87194	5.07637	5.73404	5.7523	5.8586	4.77727	5.2011	5.89471
LAMC1	8.16804	7.94236	8.21382	8.88705	8.535	7.73996	8.22335	8.10884	8.27388	7.85788	8.68759	8.27949	8.41642	9.29052	8.36675	8.87124	8.2229	8.03022	7.8976	8.53403	8.50165	9.32745	8.41207	7.98057	8.43818	9.14544	8.5399	8.3795	8.25281	8.82503	9.37975	9.6759	8.6676	8.86763
LAMC2	4.7896	6.17369	5.36777	5.3898	4.90653	4.81728	5.27025	4.96247	5.04642	5.69684	5.0058	4.75802	4.8526	4.92458	5.00864	4.6667	5.17207	4.72488	5.24687	4.65357	5.45888	4.70152	5.51959	4.74823	4.92225	4.70581	4.89213	4.69381	4.78526	5.19647	4.64068	4.46502	4.9316	4.6661
LEPRE1	6.9913	7.13151	9.66641	6.98958	8.01275	8.63417	8.69043	9.72464	8.60833	8.87095	8.53831	8.59013	8.811	8.44044	9.37617	8.82315	8.84323	9.19534	9.60177	9.5169	8.69061	10.0985	9.13386	9.56018	8.2558	9.13035	9.217	8.99727	9.39348	9.23357	9.25427	9.50972	7.76136	8.86713
LGALS1	10.0944	6.96044	10.9645	11.9071	9.50334	11.4606	10.0746	11.4876	11.6269	9.73119	9.80961	11.5253	12.4221	11.4186	11.3567	10.5129	11.5667	12.6273	11.5944	11.673	12.4922	10.9539	11.9285	11.6042	11.8927	11.384	11.4437	11.6518	12.7691	11.7641	12.0925	12.79	11.989	11.5942
LOX	5.44445	5.7462	7.57907	4.76885	8.49523	8.88819	5.44016	7.81735	7.23095	5.59268	7.53763	8.97232	6.55965	6.72232	7.13138	8.2515	5.89968	7.52375	6.42095	7.14171	6.54692	7.6565	5.80958	6.37139	7.46387	6.80664	7.4603	8.20919	6.75758	7.40332	8.54865	7.3138	5.98597	8.4796
LOXL1	7.59414	5.65528	6.41798	10.8218	9.43707	6.77741	6.15369	5.35821	7.98827	6.13642	5.20959	5.55436	7.36433	7.75003	7.93481	6.36338	7.07494	9.68417	7.9591	8.98957	8.92123	8.15411	8.15127	8.97671	8.99256	9.36456	6.52325	6.90284	10.447	8.26897	9.08007	10.586	9.72109	10.6859
LOXL2	6.33183	6.55988	5.95787	6.61074	5.41551	5.90706	6.20774	5.92216	5.6607	6.20615	5.88233	5.99787	6.04423	6.44379	6.21399	6.28298	5.89292	6.11684	6.34038	6.20924	6.14128	6.04908	6.05217	6.74262	5.63551	5.61391	6.24989	6.20157	6.38378	6.47114	6.76655	6.99755	6.61304	7.43523
LRP1	6.39994	6.9841	7.43725	6.57356	6.95603	7.27653	6.96664	7.7605	7.40606	7.12905	7.04562	7.2432	7.09026	6.8584	7.02133	7.07176	7.1852	6.79402	7.04076	7.17957	7.07095	7.35174	7.39037	7.18464	7.19683	7.39904	7.94623	7.32515	7.2471	7.67393	7.16294	6.84881	7.77967	7.32913
LRRC15	6.8519	8.79912	9.00605	6.13828	6.71128	8.1292	7.89502	11.1398	9.73864	9.47496	9.89653	9.3635	10.2835	9.35984	9.99941	7.88166	10.4272	10.4568	10.6481	10.2172	10.448	8.92211	8.80795	8.92752	8.98752	9.33858	10.9861	10.0242	11.3116	9.69573	9.70731	10.1352	9.36714	10.8472
LUM	9.34545	12.1702	10.9405	7.923	10.5387	8.71326	10.1372	11.1015	11.2169	10.6274	11.3452	10.7753	11.4291	11.6201	10.9927	10.6195	12.1565	11.9764	12.635	11.73	10.6298	10.9886	11.4525	11.0079	11.1979	11.3056	11.7733	10.346	11.1018	10.6331	11.6183	10.7236	11.5927	11.072
MATN3	3.15343	3.60639	3.23047	3.14382	3.27015	3.27011	3.30603	3.25293	3.51017	3.34575	3.29677	3.7766	3.17864	4.69869	3.28706	3.33896	3.6196	3.21203	7.61111	3.45891	3.55204	3.58914	3.35883	3.63246	3.50615	3.88655	3.42896	3.9988	3.23865	3.41438	4.08993	3.13661	3.25622	3.31868
MCM7	8.07992	5.71198	6.38312	6.99404	7.71092	7.50523	6.76852	7.60379	7.2989	6.15245	6.53355	7.93424	7.86655	6.42782	7.09162	7.57626	6.36223	8.03815	6.80186	7.19794	6.627	6.50645	6.57039	8.25581	7.45479	7.12241	7.6565	7.22519	7.88638	6.60844	7.53481	7.98863	6.07054	6.81565
MEST	12.1247	6.86706	7.57328	11.8261	8.92563	5.42817	6.21849	5.87018	6.35052	6.48609	7.04514	7.57378	5.85842	10.5485	4.5163	7.56792	5.97371	6.02709	6.51743	8.80044	5.81683	8.47819	5.97027	10.911	9.09175	9.80717	9.10775	5.68165	5.09871	6.93676	8.75877	5.35187	6.1617	7.24279
MFAP5	4.44476	4.78613	4.3728	4.10121	3.97611	4.08542	4.2499	3.97354	4.12352	4.78052	4.89609	4.4497	4.28832	4.06783	4.0971	4.97994	4.79189	4.1878	4.4129	4.31498	4.95128	3.97088	4.86163	4.55764	4.92987	5.7444	5.52241	3.88789	4.16137	5.14546	6.6878	4.00134	5.42806	8.20891
MGP	6.88925	6.43493	8.30904	11.98	8.52977	6.26458	7.80427	7.46813	6.51278	7.22991	9.24626	8.24148	9.919	10.3499	8.37807	10.1726	10.0082	9.63269	8.81261	8.72383	9.78282	9.7465	8.14345	10.2151	6.9801	9.99397	10.8637	9.37985	7.68611	10.9052	9.64937	8.62383	8.64927	7.90448
MMP1	3.43016	3.51731	3.49032	4.0252	3.58357	3.77951	4.12519	3.74219	3.45556	3.80174	8.53045	5.20755	3.7705	3.9376	3.71618	3.55944	5.80625	3.48338	3.87186	5.59744	3.75091	3.45894	7.30503	3.37184	3.45724	3.55526	3.76329	3.39159	3.85855	3.5534	4.13339	4.35941	3.39782	6.46542
MMP14	7.45901	7.56887	7.23543	7.25224	7.77621	7.99205	7.62799	7.8376	7.68932	7.52619	7.37056	8.52556	7.7666	7.40993	7.97719	8.15776	7.09512	9.45362	7.67617	8.19818	7.29912	7.24691	7.5029	7.47924	8.29079	8.39127	7.33563	8.53205	9.17563	7.85444	9.29063	9.32302	8.09033	10.1169
MMP2	6.63753	8.20697	9.43897	9.19687	8.85657	7.70597	9.20437	10.0132	9.45252	9.34238	9.37038	8.96666	10.4306	10.1524	8.68166	8.31879	10.2632	10.6993	9.66734	9.63609	10.6653	10.698	9.97024	10.7572	10.948	10.961	9.87443	9.30445	10.4281	10.643	10.417	10.5017	8.37637	11.4702
MMP3	3.90713	4.39497	4.25897	4.15062	3.98293	4.28765	4.48992	4.13303	4.11618	4.3477	4.72358	4.19687	4.01719	4.18934	4.08795	4.06271	4.25813	3.84149	5.30089	4.23049	4.23221	4.11881	4.21884	4.15826	3.94216	4.09062	4.19685	3.63859	4.05855	4.27023	4.01591	3.96903	4.07253	3.97869
MSX1	6.25706	6.96409	7.89158	7.02473	7.00141	7.84191	7.40814	8.42071	7.47302	7.01728	8.06773	6.83736	7.01216	7.95393	8.54368	6.85489	7.85391	7.35538	7.44342	6.89851	6.43232	7.59326	6.82549	6.86557	8.17125	7.91441	8.09061	6.97931	6.77824	7.26374	8.47685	6.56784	6.37869	7.15855
MXRA5	10.3305	10.7143	10.0688	9.76432	7.28463	8.96947	9.55108	9.23806	9.09522	10.0018	10.5771	9.15608	9.97087	11.3914	9.39507	7.99306	10.1256	10.3287	10.5651	10.4319	10.9831	7.8836	9.87097	10.9283	10.721	9.46779	9.46169	8.82745	11.3962	10.7476	10.0663	10.2784	10.694	11.0706
MYL9	6.63329	5.6099	7.87086	6.03945	7.39397	7.30381	6.95439	7.91085	9.09899	6.54264	6.53891	9.3487	7.87907	6.52975	7.57197	8.35846	8.95853	7.08763	7.25084	7.62583	7.15503	9.24214	9.04387	7.1428	8.67305	9.0694	7.91141	9.06274	8.41634	8.95423	7.58878	10.239	9.60853	9.15795
MYLK	6.08696	5.69246	5.95355	5.16169	8.72955	7.58571	8.17772	8.68146	7.69576	7.75657	6.63056	8.99065	7.25589	7.35637	9.41109	6.01136	9.45085	10.1736	7.41832	7.75144	7.8086	9.85689	8.28917	7.15392	7.52661	8.56126	9.02171	7.60627	8.83645	7.52109	6.93998	8.74813	9.67438	7.91177
NID2	6.74257	8.08464	5.49982	5.49166	6.20227	6.39292	7.07577	7.91693	6.36454	6.53863	8.46874	7.13106	8.44278	9.05359	9.42907	8.3949	6.95389	9.7926	7.60218	8.31069	8.63219	8.22043	8.3568	8.02545	8.38355	8.56789	8.50519	8.30026	10.2291	8.63011	9.40437	9.60912	6.79065	9.59932
NOTCH2	6.76568	7.78046	7.44599	6.36625	7.25038	8.56512	7.70708	7.89853	7.69199	7.41959	7.41352	7.40754	7.88967	7.76185	7.83241	7.10134	7.4925	7.84868	6.77814	7.49413	7.21449	7.59159	7.03753	8.17772	8.4227	8.02161	7.29838	7.29222	7.64124	7.81342	8.32097	7.78192	8.86277	7.62083
NT5E	5.55345	5.84762	5.77582	7.26204	5.87188	5.517	6.26066	6.02877	6.20403	6.36518	5.82868	5.57258	7.65388	6.48835	7.06858	6.36512	6.26695	6.6146	6.55396	6.70029	7.54858	5.8765	7.12554	6.46139	6.74764	6.10013	6.56663	7.15006	6.7307	6.696	6.36093	7.49799	9.64319	7.30814
OXTR	5.35746	5.86937	5.44712	5.02734	4.87074	4.95394	6.05699	5.14848	5.61982	6.08346	5.09723	4.87263	4.78603	5.42204	4.52037	4.76522	5.79037	4.59134	5.17296	4.81083	5.84601	5.16409	5.23644	5.23541	5.01742	4.87571	5.4	4.76555	5.00382	5.48519	5.00308	4.69908	5.04973	6.46581
PCOLCE	8.20438	8.46094	9.34735	7.73803	8.46458	9.53772	10.0843	11.1879	10.3565	9.42377	10.1745	9.81782	11.5666	10.2832	9.72546	9.18367	10.2438	11.5367	10.6214	10.1785	8.71001	10.8719	9.40999	10.8303	12.1513	9.42135	10.2364	10.6748	11.2642	11.1034	11.2241	10.6333	9.67488	10.529
PCOLCE2	3.67522	4.38434	6.97195	3.78944	5.54286	7.37707	5.73532	8.33622	6.83773	4.95231	7.46241	7.12891	5.07874	5.43235	5.23693	5.99505	4.42572	5.00293	6.44426	5.45822	4.21445	7.32954	3.77237	6.69444	3.96763	6.31148	6.71795	6.40985	5.40339	3.82116	8.10165	3.91253	6.40639	5.68732
PDGFRB	6.92201	7.42673	6.76678	6.07083	6.45716	7.01111	7.80631	7.43098	6.75051	8.15164	7.7578	7.31501	7.4791	7.53898	7.88278	7.87671	7.55108	7.05769	7.50928	6.95689	7.56494	7.14728	7.53812	7.98624	7.95342	6.81838	8.01919	7.4025	7.09046	8.19404	8.17637	8.41498	6.7607	8.5741
PDLIM4	5.70403	5.67156	5.62425	6.3153	5.39706	5.67811	5.61107	5.76469	5.69093	5.91154	5.88337	5.5709	5.61534	5.63127	5.52823	5.43039	6.02402	5.92445	6.07361	5.60454	6.23441	5.9275	5.55354	6.21187	5.76305	5.57035	5.78638	5.54248	5.78691	5.6865	6.11153	6.47752	6.28165	5.99654
PFN2	10.2004	9.60458	10.6389	10.4115	11.0791	11.0493	9.61653	10.3672	10.341	8.80417	11.0417	10.9497	9.958	10.2589	10.581	9.97187	8.83723	11.4527	8.80483	10.7243	9.02457	11.1582	9.11883	9.49122	9.67914	10.8375	9.8269	10.0928	11.286	9.4278	10.5264	10.0206	9.19902	10.3445
PLAUR	6.39127	7.26649	7.12888	7.36717	6.58494	6.8087	7.25357	7.27904	6.87283	7.71874	7.01193	7.33622	6.92089	6.55177	7.05346	7.55924	7.24215	6.6795	7.09843	7.42678	7.11944	7.94498	7.55277	6.67089	6.82294	6.90224	7.29234	7.33251	7.77134	7.08384	7.07047	7.80912	8.31954	7.67836
PLOD1	7.38776	6.88256	9.11033	9.05079	8.52742	8.81438	8.33465	9.23179	8.52499	8.30677	8.46127	8.94069	8.2775	8.76116	9.43535	8.70643	8.81817	9.10172	8.82772	9.26331	8.75304	9.4676	8.638	9.48969	8.51112	9.10456	9.36395	8.36248	8.88854	9.26443	8.63905	9.48475	8.56492	8.68757
PLOD2	5.79983	7.06943	6.99771	7.85573	7.74603	8.54776	6.69327	9.9054	8.22642	6.24971	7.75469	9.84065	7.52338	7.88471	9.66884	9.23842	7.30928	9.38004	8.45826	9.41368	8.93961	8.79275	7.11056	8.55394	7.89781	8.04631	7.88477	8.57751	9.80204	6.87404	10.1522	9.27926	9.6798	9.81506
PLOD3	7.54501	8.23316	7.45015	8.28259	7.78024	8.10046	7.94256	8.26029	8.76834	8.33845	8.46396	8.26609	8.4841	8.31657	8.08203	8.35638	8.27826	8.69535	9.31741	8.16385	7.83518	9.32657	8.04316	8.88139	8.47771	8.05107	8.98462	8.34864	8.9733	8.35645	8.64255	9.20462	7.56445	8.46209
PMEPA1	5.57884	5.96065	5.43491	5.81361	5.28139	5.51928	5.73283	5.39308	5.49094	6.37185	5.11406	5.53738	5.56387	6.5213	6.15205	5.45797	6.13552	5.69479	6.74511	6.13337	7.02362	5.49737	6.1545	5.70357	5.80216	6.07026	5.26926	6.73706	6.29082	5.86378	5.98549	8.03508	5.71189	6.0524
PMP22	7.01301	8.7886	10.149	8.84934	8.85032	9.16225	8.84739	9.04092	9.21012	9.83013	9.1303	9.06183	8.82065	8.83122	9.23511	9.70579	8.99311	9.87338	9.94278	9.46014	9.71789	10.682	9.55447	9.55917	9.14817	9.85299	9.74972	11.0849	9.81774	9.59462	9.36909	10.1549	10.1136	10.1788
POSTN	7.52255	5.72892	5.00556	5.39193	6.68409	5.15775	7.32877	6.10911	5.76274	6.77761	7.49453	6.66831	7.41948	7.17063	6.95721	6.76037	6.76109	6.24489	6.87564	6.89492	7.89034	6.81874	7.5861	6.44464	7.23147	7.32941	7.03169	7.36416	7.91445	7.17422	7.65855	8.44283	8.19267	7.92725
PPIB	9.16637	5.11828	10.1738	9.3837	10.741	11.32	7.45976	10.3527	10.1202	7.6364	9.83759	10.0168	10.0647	9.22754	10.2296	10.5074	9.24706	10.597	9.84287	11.0282	9.80977	11.1479	9.70814	10.712	10.5598	10.4145	10.9969	10.8756	10.5984	10.3914	10.7708	11.3096	9.80057	10.9646
PRRX1	6.90514	6.39292	5.67378	8.26181	7.35899	5.83696	5.96535	6.15584	6.9897	6.23649	5.71024	6.54725	6.85872	6.42451	6.96391	6.72483	5.73766	9.32224	6.19039	8.03813	5.77367	6.873	5.98002	6.54772	8.78099	9.47987	5.69053	7.23092	8.72782	7.76573	8.03037	9.31217	8.76806	8.02978
PRSS2	5.38115	5.22095	5.6277	5.77547	5.10448	5.55965	5.26951	5.26204	5.31241	5.69636	4.93347	5.26862	5.2942	5.28596	5.20484	5.49063	5.38333	5.30705	5.33794	4.97561	5.45732	5.08511	5.41474	5.02627	5.1888	5.0333	5.07016	5.40711	5.33636	5.56351	5.30393	5.02248	5.21248	5.17873
PTHLH	3.73933	3.93563	3.74079	7.25472	3.6617	3.7435	3.79595	3.55913	3.72662	4.07695	3.76541	3.70578	3.57498	3.75035	3.71951	3.63185	3.8573	3.56642	3.78936	3.67538	3.83936	3.54595	4.12586	3.69982	3.61204	3.59478	3.64453	3.62248	3.67476	3.90281	3.58177	3.57329	3.66746	3.65925
PTX3	3.62445	5.33416	5.63956	5.17655	10.6388	7.80835	4.98679	6.61537	6.28246	5.97868	6.57108	10.6203	6.38455	7.6662	6.59933	5.26363	5.51454	6.62593	6.41432	7.72504	6.39848	10.2869	4.67541	5.42908	6.86567	8.99956	6.35064	5.02524	6.19412	5.71484	6.14317	5.63319	6.46046	6.57928
PVR	5.46247	5.52649	5.49751	5.43653	5.35411	5.22088	5.48043	5.28312	5.38527	5.52724	5.21007	5.49986	5.19698	5.29877	5.11461	5.46425	5.30583	5.0662	5.53641	5.37153	5.45681	5.28816	5.30432	5.00952	5.26839	5.08614	5.10553	5.36587	5.29617	5.3295	5.16491	5.04762	5.31476	5.50514
QSOX1	7.1062	7.23842	7.39397	7.11263	7.5122	6.95121	7.46151	7.91991	7.65807	7.67532	7.56522	7.52843	7.1189	7.5993	7.43827	7.34978	9.03691	7.4155	8.22888	7.41233	7.9462	8.51913	8.0302	7.87601	7.7941	7.95212	7.75799	7.73286	7.49822	7.98664	7.64526	7.82944	7.83786	7.81673
RGS4	6.33215	6.19445	5.91309	5.36005	5.22213	5.55073	5.79826	5.29035	5.52632	5.94033	6.11593	5.5428	5.55516	5.90191	6.3683	5.40553	6.10416	5.28132	6.03272	5.54666	5.48602	5.30615	5.93562	5.2965	5.38858	5.54919	5.63476	5.42623	5.58172	5.99025	5.69451	5.41888	5.61255	7.40989
RHOB	9.09495	7.32524	8.44227	9.01053	9.07081	8.41618	8.03689	8.65157	10.5734	7.95881	8.08063	8.09642	8.26983	7.98473	8.43747	9.46452	7.16671	7.36672	7.24865	9.06831	6.53964	9.34921	7.75649	9.20077	9.19223	8.65517	9.1468	9.08983	7.46587	8.79393	8.80164	9.83223	8.74197	8.42461
SAT1	7.4195	8.34849	8.35126	10.4677	8.28469	8.1301	9.81193	9.09334	8.62646	10.6104	9.19345	9.1595	9.18872	8.61759	9.86695	9.76377	9.22671	8.09063	8.5998	9.42162	8.84988	9.17455	9.85531	8.25136	9.21553	9.19892	8.81704	9.94248	8.69984	8.94981	9.12638	9.36288	9.94999	9.38936
SCG2	4.40358	4.74775	5.01938	4.96215	4.52047	4.37621	4.34097	4.23373	4.30994	4.90067	4.50885	4.24457	4.44066	4.39417	4.24412	4.92978	4.92855	4.72314	4.63605	4.75571	4.51355	4.34975	4.82585	4.52354	4.19956	4.7071	4.77978	4.25791	4.5005	4.80388	4.38011	8.35624	4.66292	4.7808
SDC1	5.68644	6.1777	5.86501	5.84845	5.34786	5.92051	6.04847	6.64928	7.07562	6.79009	5.93324	6.25833	5.88148	7.10961	6.70425	5.84322	7.22766	6.51923	6.35166	6.36034	6.53645	6.66515	7.02722	6.51959	7.45213	5.76912	5.89335	6.22683	6.85336	6.7373	7.1672	6.45542	6.52243	7.02798
SDC4	4.78992	6.72702	7.9333	9.31687	7.27256	6.1781	8.32922	7.61599	8.30277	8.00101	7.16762	7.77949	7.7514	7.89553	7.65896	6.9621	6.42418	8.05145	7.71905	7.83538	7.57094	7.66433	8.04422	9.32364	8.28824	7.99475	7.00596	8.08442	7.11022	6.80916	8.09405	8.57326	9.28161	7.1268
SERPINE1	5.4542	5.64636	5.56857	6.30711	5.23293	5.51943	5.78493	5.184	5.62438	5.78277	5.50927	6.26541	5.54943	5.41375	5.38642	7.42933	5.85937	5.14056	5.75669	5.34816	5.58575	5.58081	6.01382	5.17138	5.69906	5.2694	5.33977	6.09194	5.74316	6.14445	5.62415	5.95489	11.3566	9.75849
SERPINE2	9.42673	6.48868	9.09724	8.89817	7.30998	10.2086	8.61739	9.07116	8.28347	8.27574	9.33645	9.89156	9.94856	9.85425	9.92363	10.3746	8.57918	9.65843	9.47122	10.0879	9.14905	11.0572	7.98012	9.63747	9.18329	10.6685	11.0278	11.1571	9.46456	9.97272	9.67751	9.82951	8.19762	9.31011
SERPINH1	8.30996	6.90044	10.672	7.9853	11.0964	11.4344	8.62099	11.0546	11.1412	8.89688	9.29015	11.1529	10.7946	10.0806	9.97528	10.7362	8.5456	10.5642	10.3777	11.0905	9.41578	12.2067	8.66885	10.449	10.344	12.5923	11.2436	11.1404	10.3684	10.8812	9.72183	10.0155	9.46037	11.2011
SFRP1	5.87009	5.38321	5.16804	6.26663	4.81819	5.17131	5.23893	4.87587	5.11373	5.32935	5.16303	4.92129	4.91825	5.20814	5.07297	5.11003	5.2357	5.12161	5.18592	5.0185	5.10244	6.61561	5.28043	5.49165	5.0714	5.06565	5.49494	5.53736	5.01166	5.9131	5.83931	5.34773	5.08496	4.83115
SFRP4	6.70206	6.08367	5.28406	6.49245	5.19928	5.47726	8.69335	5.42722	5.25454	8.44303	8.3113	5.34892	7.97294	6.13901	7.56831	5.48404	6.92687	7.39239	5.70202	6.2035	8.81597	5.06458	8.22206	6.86302	6.38698	6.86154	6.44393	7.15836	10.8438	9.95502	6.35404	10.3139	11.0661	6.94714
SGCB	6.39521	6.28725	5.70512	5.30971	5.16798	6.31681	5.2458	6.15891	6.15246	5.42489	6.50865	5.72437	6.25917	6.59255	6.45771	5.68365	6.02278	6.31474	6.19144	6.36333	6.3426	6.2641	5.77892	6.21735	6.17484	6.14519	6.73096	6.07862	6.3829	6.15575	5.98565	6.87979	6.65028	6.05094
SGCD	5.92264	6.06541	5.77488	5.37616	5.51199	6.23147	5.62529	5.57346	5.70548	5.79564	5.82668	5.72965	6.19981	6.12001	5.41335	5.46528	6.04266	6.19485	6.64745	5.72095	6.15559	6.06097	5.74177	6.01389	5.68352	5.81026	5.82441	5.72809	5.5152	5.70814	5.71986	5.4814	5.65162	5.60027
SGCG	5.11677	5.43798	4.75333	4.69378	4.35005	4.93718	4.95558	4.71793	4.51931	4.91832	4.91435	4.3017	4.46098	5.30375	4.67537	5.15273	4.87822	4.58768	5.15871	4.5746	5.12337	5.89908	4.79557	4.6003	4.13507	4.78898	4.8497	4.66107	4.74808	4.86934	4.66175	4.52554	5.10148	4.63981
SLC6A8	6.96033	6.79736	7.20699	8.18472	8.08309	7.36593	6.83949	7.46976	7.20895	6.5743	6.34579	7.42349	6.9498	7.10548	7.37492	8.10856	6.69186	7.10162	7.7076	7.40667	6.49935	7.87191	6.45918	7.42212	7.24319	7.4631	7.24784	7.10757	7.12011	6.82448	7.40592	7.22051	7.12535	7.44758
SLIT2	6.61565	7.01254	7.69281	6.35046	9.68871	9.63481	7.58095	8.52685	8.44903	7.98437	6.82557	7.89393	7.62367	8.0246	8.85843	8.12084	7.46372	8.52219	7.23707	8.49891	9.13162	9.52669	7.36188	8.85806	8.80191	6.88059	8.2317	7.88383	8.58795	8.54614	9.2707	7.7613	6.55154	8.7964
SLIT3	5.4469	6.04214	5.80495	5.63839	5.36512	5.70197	5.8011	5.63309	5.91532	6.15946	5.52162	5.54537	6.66955	5.73732	5.86733	5.48325	5.96354	5.91321	5.87034	5.75197	6.19928	6.04028	5.70759	6.16252	5.9521	5.60457	5.7743	6.01125	5.66451	6.13087	6.21499	5.75841	5.4034	5.4602
SNAI2	8.71531	6.71526	6.66002	4.27853	6.6144	8.47841	6.5258	8.43908	8.99059	5.96059	8.07497	8.43866	9.33183	10.0206	9.93114	9.07321	7.05887	10.393	8.1728	9.88506	7.65602	9.81323	7.69512	9.84684	9.50993	10.5067	8.82541	9.51828	10.6004	9.39364	9.86902	10.5274	8.32936	9.69548
SNTB1	4.9736	5.54757	5.18618	4.63876	4.77424	4.85026	5.17317	4.82463	4.82497	5.34482	5.00013	4.76859	4.6168	4.76126	4.75119	4.72632	5.14532	4.62116	5.05779	4.63468	5.23323	4.94739	5.04123	4.70011	5.2631	4.84536	4.70148	4.95286	4.9595	5.19601	4.76102	4.94071	4.80421	4.97235
SPARC	9.84679	10.1852	10.8743	9.38293	8.76802	10.7814	10.018	11.1937	10.6054	9.54924	10.2645	11.0272	11.6806	10.7006	10.8839	10.8182	11.4364	11.7148	11.1038	11.1435	11.0625	11.0354	10.0544	11.4592	10.9345	11.4156	10.9845	11.6835	10.8006	11.4882	11.3926	10.9905	10.2067	10.9357
SPOCK1	6.64152	7.70024	9.10439	5.06108	5.54522	7.29716	6.38357	9.25667	6.13614	7.25635	8.67252	7.54147	7.10804	6.01572	5.79604	6.66748	7.11028	5.77127	6.63029	6.19097	7.41199	8.48808	7.4527	5.64986	6.17907	6.37538	9.11359	7.49416	7.99606	9.07293	8.67664	8.67961	7.52723	9.59916
SPP1	8.21988	8.41979	7.91413	10.7289	7.72703	11.5533	11.2203	11.3134	9.77829	9.81907	9.54863	11.9536	11.6081	10.4872	12.2501	10.9237	9.34495	9.76579	9.26138	11.4315	8.65044	10.6639	8.80044	9.83778	11.2253	9.28683	9.34734	12.4423	10.0821	11.0759	11.6973	10.6641	11.5145	11.3694
TAGLN	7.51687	5.66671	5.59328	5.91089	7.03006	5.47685	8.39874	6.95936	6.88592	7.45123	6.41132	8.45441	8.37985	6.5505	8.0657	8.89423	9.15701	7.67839	7.6035	6.70591	9.39195	8.09912	10.3173	8.74384	7.69128	8.98426	8.86967	8.726	7.20795	8.63771	8.90522	10.7701	11.158	9.9547
TFPI2	3.85216	4.37752	4.12546	8.95931	4.53573	4.0459	4.37204	3.87417	4.25752	4.56868	3.96553	3.90375	3.89436	4.50252	4.03717	4.52382	4.10323	3.78735	3.97833	3.9642	4.15158	4.12415	4.68408	4.01107	3.89347	4.05822	3.98392	4.09027	4.77888	4.40138	5.27444	3.78991	4.12214	4.29769
TGFB1	5.10462	5.27821	5.87548	5.99503	6.49903	6.77123	5.26375	6.37901	6.69007	5.66152	5.1313	6.70579	6.06025	5.82976	6.28878	6.69781	5.19342	6.39545	6.91177	6.40879	5.53008	6.43018	5.6532	6.67292	6.86728	6.1164	6.0268	6.53214	6.32485	6.78572	6.72609	6.15999	6.79382	6.64394
TGFBI	8.64837	10.2026	7.8677	11.2928	9.22534	9.12345	10.767	10.4545	9.76364	11.9197	10.7083	10.6807	11.5054	11.3416	12.0678	10.8361	11.2546	12.9097	11.4728	11.2542	12.1559	9.20136	11.8679	12.6448	10.6499	11.2959	9.41772	11.8961	13.1109	11.4993	11.8929	13.5735	12.2983	12.7086
TGFBR3	4.73266	5.16384	4.82802	5.54036	4.72824	4.70067	4.8934	4.7369	5.23222	5.51668	4.82034	4.5496	4.50213	4.6698	4.75379	4.57102	5.06978	4.99998	4.95542	4.55719	5.9499	4.71562	5.19864	4.87054	4.95615	4.7267	4.84343	5.67927	5.03332	5.43344	4.38023	4.83153	4.73152	5.14872
TGM2	5.48871	6.17112	5.62701	6.36832	5.60944	5.96398	6.26227	6.0269	6.15776	6.43314	6.06237	5.61495	6.34374	5.62724	5.79007	5.5711	6.09874	5.45058	5.73329	5.58419	5.46318	5.68385	6.00948	5.46577	6.33901	5.52009	5.90545	5.93628	5.47718	6.07669	5.50345	5.40148	7.29928	5.84083
THBS1	5.59669	6.11599	5.78453	4.97998	6.9492	8.43944	5.50229	5.15363	5.84621	5.77709	5.68272	9.06174	5.73873	5.91596	5.69172	8.38931	6.6179	5.38005	6.33863	7.00161	5.80559	6.3078	6.31406	5.62819	6.5166	6.16401	6.11133	7.98608	5.2293	6.35963	6.52478	6.1596	5.80722	7.45023
THBS2	7.94162	11.0569	7.49842	6.11209	8.28543	6.0236	9.14373	8.36502	8.76287	10.2275	10.4266	9.0077	8.62781	9.95922	6.82011	8.68483	11.7704	8.15598	10.8702	9.48489	11.3554	9.8752	10.4454	10.1058	8.34071	9.60601	10.9775	8.7187	10.3372	10.2259	9.36598	10.7336	10.7131	10.4478
THY1	7.51983	7.75847	7.505	6.10272	7.71119	7.68676	8.48937	7.46135	7.6572	8.91907	8.07443	8.32771	8.46089	8.03257	8.73598	8.72877	9.33927	7.70171	8.80532	8.4827	8.82671	7.30399	8.93775	7.85816	8.10214	8.22389	8.82846	9.49015	8.95259	9.9563	8.53967	7.59496	8.90663	10.2645
TIMP1	8.77276	6.12515	9.14147	11.6695	10.2949	10.0612	11.5124	11.1245	11.2356	11.0053	10.473	10.5429	11.5825	10.5652	11.5634	11.4015	10.8909	10.974	10.7674	10.5397	10.229	10.8247	11.7331	10.8047	11.6029	10.6307	12.2451	12.338	11.9197	12.0446	11.2191	11.9513	12.7619	11.3874
TIMP3	7.87577	7.04413	6.44008	9.94645	6.15288	6.93551	7.55968	6.34753	6.80654	6.7394	6.46416	8.04702	7.2674	7.47578	6.67001	7.33681	8.24099	6.02079	7.96592	6.61776	6.58357	7.2528	6.8744	6.89596	7.4638	6.55694	7.09387	8.17766	6.79932	8.6016	7.97197	9.19509	10.0578	8.91988
TNC	5.71882	6.43386	5.88882	8.54698	5.6381	7.67434	6.3161	7.29011	6.49471	5.86678	6.61704	6.59873	9.2586	7.53052	9.1823	6.69847	7.26725	9.69	7.19199	8.7978	9.8727	6.74113	6.78034	8.99656	7.61228	9.08791	7.67781	7.9322	8.51933	7.39034	7.68476	9.70973	8.2937	7.43021
TNFAIP3	6.11748	7.04957	6.16983	6.54513	6.67347	6.04945	7.24679	6.54735	6.31766	7.19495	6.74299	6.62419	6.44562	6.29366	6.76593	6.8748	6.18287	5.7675	6.3508	6.42017	6.47415	6.1549	6.67278	6.2043	6.69899	6.31598	6.14048	7.05463	6.33847	7.23107	6.12722	6.28045	6.89	8.2253
TNFRSF11B	3.80598	4.21738	4.16657	3.85729	3.91696	3.89958	3.88271	4.02899	3.9409	3.9781	4.03038	3.83352	4.1272	5.07681	3.96905	4.08631	3.84162	5.36872	3.99875	4.34371	3.78338	3.96212	3.76181	4.46144	3.94883	7.88686	4.02464	4.36126	4.3792	3.84391	3.77164	3.97899	3.91692	3.97837
TNFRSF12A	5.53363	6.40498	5.8478	6.21079	6.60635	6.0251	6.67693	6.59078	7.61397	6.92545	6.14484	6.43526	5.4434	5.12321	5.82288	6.11912	5.9946	6.4856	5.80383	6.0499	6.34651	5.68704	5.9831	5.85583	6.92006	6.17865	5.79993	6.5727	6.55348	6.78614	5.91973	7.04697	7.92988	7.02646
TPM1	6.79439	7.88981	7.77777	8.60421	7.68931	8.00556	8.14105	8.94606	7.74122	7.38049	7.8989	7.62336	8.40609	8.03414	7.99805	7.66258	7.89632	9.45738	6.90678	8.33778	8.12044	8.77658	7.83701	9.01927	8.55007	9.13775	8.00005	9.01389	8.49921	7.60054	8.34618	9.47846	7.91298	9.82334
TPM2	9.50801	6.44419	8.06537	6.65437	6.35514	6.68262	6.80668	7.58588	7.2597	7.31019	7.17388	7.31678	7.21569	7.42763	7.5925	7.26508	8.17647	6.28359	6.88443	7.71115	8.66491	7.15087	7.71865	7.44896	6.35869	6.99332	7.76877	6.6752	7.32165	6.31747	7.15579	8.34583	6.96809	6.46716
TPM4	6.71417	5.51312	5.81399	8.45978	8.15492	8.14665	5.62316	7.4095	6.82966	5.59327	6.269	8.78806	7.78723	5.28055	7.15883	8.48854	6.01214	9.02796	6.49587	7.77417	8.20346	7.84713	6.75756	6.98962	7.82248	8.34002	6.29676	8.88887	9.24263	8.14443	8.35755	9.48622	8.65018	8.77161
VCAM1	5.27039	7.95114	6.41389	10.589	6.90898	5.18138	8.12238	6.6364	7.47984	9.58805	8.89646	5.09411	7.3801	5.50243	8.88652	5.69665	9.44755	6.36486	6.74796	6.87661	6.91646	6.47988	9.40707	7.50815	8.78912	7.30166	6.59506	8.26577	8.69146	8.98035	5.94925	9.80164	12.1569	7.04406
VCAN	8.41706	7.04477	6.59708	5.31913	7.30133	7.68748	7.70147	7.26335	7.75843	7.07404	7.86663	8.13555	7.94154	8.81408	8.5117	8.46556	7.70571	8.26097	6.72528	8.30319	8.45938	8.61497	7.74395	8.69883	9.2885	8.63468	7.87544	8.66623	8.50928	9.78731	9.43072	9.98583	6.52677	9.83102
VEGFA	7.29736	7.22403	7.83198	7.92107	7.68437	8.22098	7.98822	6.78054	7.20539	7.10134	6.7576	8.81846	7.36436	8.07353	6.7406	8.74225	6.67103	7.31117	7.83448	7.30536	7.2649	7.55508	6.79832	8.17487	8.3937	7.66169	7.21109	7.974	7.41541	6.85523	7.87586	8.96165	6.53807	8.83758
VEGFC	5.4024	5.89151	5.48295	5.60506	6.82296	6.61168	6.18867	5.94823	5.76771	6.43562	6.4121	6.24364	6.0339	5.82777	6.03313	6.04835	5.84001	5.45985	5.71218	5.61152	5.34522	6.01575	5.88778	5.72202	6.12817	5.61726	5.83078	6.36599	6.53813	6.00249	5.57892	6.66442	8.14936	6.74101
VIM	12.5256	5.81465	10.4323	13.0465	12.5344	12.4709	9.65548	11.9567	11.119	9.40626	10.8363	12.5683	12.5165	11.7704	12.2331	12.1523	9.16824	13.0016	11.2911	12.1941	10.9873	12.3586	11.3563	13.2675	12.5171	12.3113	11.4807	12.849	12.5476	12.5171	12.337	12.8468	12.8536	12.8309
WIPF1	5.65282	6.1269	5.87351	6.29202	5.00167	5.93613	6.22284	6.02092	5.73794	6.04664	6.24219	5.59626	6.42237	6.35005	6.53278	5.83442	6.67987	6.25537	6.43049	6.48515	6.47998	6.44406	6.35166	6.17228	6.51204	6.34707	5.71738	6.80835	6.17347	5.94375	6.22316	7.09645	7.31077	6.26876
WNT5A	5.40556	6.88784	5.54838	6.47895	4.45021	4.92978	6.67469	6.79467	5.81154	5.95302	5.80086	4.61297	5.70583	6.02574	6.10756	5.04069	5.62414	6.56409	4.98046	5.64473	5.26078	4.54406	5.63792	7.49618	7.12343	6.13923	5.23688	6.69308	5.75096	5.12918	5.27195	8.67259	5.39258	5.88289
	GSM402739	GSM402727	GSM402728	GSM402736	GSM402750	GSM402729	GSM402722	GSM402720	GSM402740	GSM402731	GSM402743	GSM402726	GSM402746	GSM402737	GSM402741	GSM402733	GSM402721	GSM402738	GSM402747	GSM402748	GSM402734	GSM402749	GSM402745	GSM402732	GSM402730	GSM402725	GSM402742	GSM402718	GSM402719	GSM402723	GSM402735	GSM402724	GSM402744	GSM402751
ImmuneScore	-2.24408	-1.3759	-1.19233	-1.04449	-0.815992	-0.783689	-0.775026	-0.750701	-0.7213	-0.68892	-0.543496	-0.54207	-0.51901	-0.403052	-0.365206	-0.335286	-0.314202	-0.251521	-0.188684	-0.0160358	0.107242	0.244845	0.421517	0.484966	0.719494	0.810126	0.885596	0.893334	1.00984	1.06465	1.51929	1.66663	2.0184	2.02506
	GSM402739	GSM402727	GSM402728	GSM402736	GSM402750	GSM402729	GSM402722	GSM402720	GSM402740	GSM402731	GSM402743	GSM402726	GSM402746	GSM402737	GSM402741	GSM402733	GSM402721	GSM402738	GSM402747	GSM402748	GSM402734	GSM402749	GSM402745	GSM402732	GSM402730	GSM402725	GSM402742	GSM402718	GSM402719	GSM402723	GSM402735	GSM402724	GSM402744	GSM402751
ADAM8	4.8836	5.31344	5.04287	4.81472	5.00198	4.88257	4.40955	4.5662	4.94888	4.9197	4.91228	4.98264	5.10722	5.23209	5.08655	4.79264	4.93277	5.17904	4.95264	4.90743	5.22966	4.85321	5.08959	5.10567	4.79841	5.22701	5.36423	4.86524	5.23424	5.53974	5.24435	5.18095	5.48771	5.08905
ADCY7	3.7899	3.78541	3.89423	5.48119	4.98492	3.80555	4.97472	4.24487	3.65021	4.72311	3.64806	3.84785	3.93127	3.96056	4.75665	4.26636	4.44406	4.86761	4.2203	5.03029	7.58676	4.18125	5.75404	5.74956	4.9646	4.67353	5.06789	4.14598	4.75187	5.74141	5.30632	5.1566	4.85643	5.07605
ALOX5AP	6.13449	6.11025	6.51561	6.37401	5.93548	5.68206	6.63007	5.83831	6.60166	5.99847	6.40114	5.90382	6.15096	6.39167	6.78061	6.24257	5.73889	6.53316	7.83179	7.35945	6.1018	6.38534	6.98738	6.01346	7.99684	6.32395	8.88501	6.65282	7.40901	6.28544	6.47232	6.13427	6.18449	6.73299
AOAH	5.30976	5.47656	5.23405	5.31549	5.12569	5.08823	5.03635	5.26693	5.63686	5.25373	5.24105	5.22394	5.17087	5.42205	5.25424	5.37373	5.14052	5.28241	5.80845	5.41928	5.54712	5.27902	5.62703	5.82864	5.62683	5.70218	5.48993	5.87211	6.17231	5.51286	6.41432	6.2741	5.82938	6.02267
ARHGDIB	6.22833	7.69621	7.69378	7.38939	7.99405	7.80195	8.48829	7.7836	7.75571	8.46028	8.29204	8.08412	7.44461	8.74304	8.24103	8.39301	7.57192	8.41988	9.05772	8.08107	8.34017	8.87249	8.5957	9.09384	9.03402	8.53534	9.34352	8.60256	9.15043	8.38684	9.29247	8.99628	9.15021	9.75032
ARHGEF6	7.3699	7.46849	7.63366	8.94899	7.96147	6.58976	7.58399	6.08841	7.20119	7.46685	7.64766	7.31177	6.828	6.79917	6.50819	7.25925	7.62627	7.47995	8.07111	8.02988	6.03828	8.86095	7.32466	7.518	7.53521	6.58878	7.9995	6.7319	7.6235	7.1282	8.69951	6.37545	6.9242	7.08745
BCL2A1	4.0253	4.06477	3.85773	3.80642	3.992	3.84916	4.03794	4.00851	3.98686	3.85936	4.24309	3.96026	4.21139	4.14626	4.1482	3.81577	4.16178	4.07296	3.96713	4.05103	4.08548	3.90269	4.01328	4.45846	4.03907	4.2063	5.75057	3.99027	4.47276	4.34843	4.01784	4.28192	4.64145	4.441
BIN2	5.15783	5.48522	4.76133	5.23268	5.45522	5.42402	5.29385	5.53436	5.3695	5.57846	5.00497	5.46852	5.8016	5.20308	5.24325	5.13637	5.07733	4.8204	5.23932	5.24288	6.51739	5.36358	5.4479	5.60788	5.79832	6.14152	5.15196	6.1388	5.73685	5.62736	5.53887	6.88336	5.71654	5.66971
CASP1	4.56958	4.77303	4.65229	5.05062	4.78177	5.01689	4.84385	4.9568	5.37159	4.86342	4.85351	4.91366	4.87559	4.72835	5.02748	5.89992	4.79936	4.70362	5.12734	5.10061	5.18204	5.06643	5.4127	5.39699	5.33417	5.22856	5.47523	5.52735	5.34701	5.55867	5.97484	5.58151	5.72237	6.23257
CCDC69	3.72709	4.09835	3.8448	3.74776	3.93655	3.9575	3.84808	3.99131	3.79265	4.15972	3.78777	4.32305	4.07942	3.84189	3.77889	4.02604	4.12792	3.7662	3.74127	3.72801	3.89863	3.90928	3.86346	4.29351	4.09244	4.10131	3.83461	3.93774	3.84836	5.40759	3.84561	4.38331	4.78309	4.21397
CCL5	4.44459	4.74267	4.67686	4.86087	5.37937	4.96205	5.00901	5.18701	4.82554	5.11377	4.93231	5.10814	5.39805	5.20777	5.09196	4.78856	5.42878	5.10774	4.85565	5.03392	5.40444	4.91853	5.40388	5.37964	4.69845	7.35591	6.11844	5.47174	5.16494	6.78936	6.33154	6.95226	7.5925	7.15304
CCR7	4.21126	5.09104	4.31187	4.11594	4.76874	4.40783	4.25696	4.336	4.21542	4.37562	4.33246	4.62826	4.48114	4.25458	4.16589	4.41108	4.6352	3.93702	4.17506	4.20859	5.19839	4.15818	4.30895	5.07591	4.30292	4.87479	4.37844	4.90541	4.64435	5.26157	4.38341	5.94855	4.92539	4.43565
CD2	5.99446	6.58742	5.76855	5.57359	6.46089	6.14228	5.78889	6.4269	5.79571	6.35165	5.96656	6.0112	6.79244	5.83379	6.06845	5.85419	6.11234	5.45255	6.06092	5.82458	7.53378	5.75462	6.24397	7.08858	6.05097	7.16108	6.35551	6.73373	6.46597	7.35767	5.88114	7.43018	7.40711	6.01848
CD247	5.49926	5.44231	5.3807	5.30151	5.65853	5.37723	5.43053	5.42982	5.33297	5.28618	5.34163	5.26617	5.3066	5.26149	5.41205	5.22024	5.88043	4.9224	5.11047	5.01253	5.7396	5.25545	5.40988	5.66601	5.32745	6.10467	5.21807	6.00635	5.31125	5.69035	5.3972	6.21149	6.26703	5.51947
CD27	5.58075	5.68633	5.26536	5.51095	5.67631	5.60379	5.3613	5.72099	5.74538	5.4556	5.44135	5.6519	5.75375	5.28635	5.61179	5.22175	5.60863	5.3664	5.40892	5.91884	5.98683	5.3658	5.50916	5.46071	5.4033	6.07542	5.58075	5.97654	5.53416	5.50179	5.75691	6.19211	5.90643	5.88567
CD300A	5.1804	5.50964	5.38941	4.90978	5.28718	5.29111	5.11324	5.10738	5.31473	5.24304	5.41541	5.32555	5.62894	5.52033	5.41628	5.26314	5.5367	5.01342	5.39248	5.27393	5.56582	5.30723	5.41757	5.4198	5.57602	5.85206	5.72	5.60645	5.37515	5.73065	5.60204	5.88943	5.69142	5.76401
CD37	4.64041	5.0824	4.95999	4.84097	4.83414	4.89951	4.86	4.93919	4.98766	4.87608	4.80928	4.62579	4.99873	4.81742	4.91829	4.7717	4.56152	4.69956	4.76508	5.08847	5.29395	4.90801	4.96303	4.87734	5.24393	5.30359	5.3348	5.56736	5.44682	4.84876	4.92881	5.27533	5.07128	5.87577
CD3D	6.05946	6.28683	5.83261	5.68973	6.07931	5.86698	5.46833	6.34497	6.02658	5.84098	6.03961	5.92743	6.41829	5.7076	6.07267	6.01051	6.17259	5.58007	6.0863	6.0794	6.59061	5.74028	6.0175	6.72872	5.65706	7.36894	6.12575	6.44915	6.00407	7.25175	6.57398	7.07727	7.79727	6.37596
CD48	6.71345	6.33722	6.62608	6.5916	6.70941	6.78996	6.53811	7.08013	6.94746	6.67709	6.98881	6.60392	7.0166	6.85392	6.72066	6.96227	6.75662	6.75567	6.74283	6.76132	6.62474	6.85359	7.1381	7.40756	7.22093	7.38347	6.7393	7.4358	7.18948	6.90376	7.54033	7.60183	7.54746	7.546
CD52	4.22071	4.7306	4.38192	4.34558	4.66871	4.63614	4.5129	4.72832	4.57278	4.51865	4.61604	4.6076	4.98357	4.48701	4.70704	4.30527	4.8024	4.32439	4.40124	4.50631	5.15432	4.76702	4.51444	4.83746	4.36364	5.23113	5.02077	4.82111	5.81667	4.9671	4.80339	5.49709	5.56288	5.39023
CD53	6.7875	7.63875	7.58568	7.04761	7.29003	8.09128	8.15443	8.07638	7.92641	7.51534	8.0294	8.11412	6.95754	7.95254	7.85264	8.41551	7.18069	7.79136	8.28969	8.30082	8.47887	8.55286	8.45015	9.03721	9.19332	8.18777	8.95229	8.89091	9.23383	8.10381	9.66745	8.63341	8.45962	9.93836
CD69	3.37721	3.32229	3.42923	3.39805	3.42771	3.41227	3.62276	3.56745	3.47873	3.64239	3.37154	3.45547	3.59277	3.2793	3.63167	3.51997	3.7066	3.53931	3.44701	3.66769	4.20522	3.38291	3.51837	3.83106	3.4244	3.81827	3.66767	3.7818	3.6095	3.89927	3.60469	4.05907	4.0616	3.8691
CD74	8.22256	7.98376	9.65439	9.24653	8.98275	7.85852	9.23877	10.4617	9.43682	9.31008	8.37609	7.30411	7.83581	9.7683	10.3904	8.95201	8.3313	9.97379	10.5203	10.2945	8.25309	9.59265	10.4114	9.95351	11.2786	8.81411	10.59	10.8832	12.0919	11.0958	10.9462	9.97737	10.92	11.0296
CLEC2B	5.40942	6.26932	5.14082	5.73163	7.31912	6.16862	6.70202	5.65505	5.82919	6.60098	5.76184	5.581	5.5921	6.05206	7.18341	5.62207	8.4434	7.37443	5.67272	7.71476	7.23104	8.36579	6.43656	6.90071	6.57206	6.86284	8.68385	6.7092	5.69445	8.54601	7.26138	7.62254	8.35163	6.99857
CLEC4A	4.50406	4.89465	4.81146	4.81733	4.68249	5.24593	5.06393	4.87326	5.01926	4.51933	5.64635	6.70903	4.86569	5.09443	4.65973	5.90659	4.98366	5.51341	6.08943	4.98444	5.27292	6.82735	6.0296	5.0302	6.50814	5.40722	5.17039	5.52203	6.1227	5.37891	7.32394	5.26007	5.93439	7.16451
CORO1A	5.57654	5.14297	5.56974	5.59694	5.7624	5.1508	5.58787	6.03455	5.64893	5.6688	5.78573	5.62636	5.78964	5.72484	6.16267	5.57401	5.50808	5.80149	6.09558	5.90311	5.59847	5.84519	6.61308	5.61861	6.13822	6.14735	6.3977	6.05252	6.21108	6.40082	6.89944	6.23816	7.08233	7.07433
CST7	5.71591	5.79325	5.45483	5.63492	5.88054	5.59279	5.39304	5.6011	5.67818	5.63374	5.69354	5.38071	6.47493	5.58792	5.73194	5.60259	5.7973	5.69749	5.66267	6.04521	5.95063	5.87835	6.31977	5.61597	5.55562	5.99066	5.73978	5.89559	6.15871	6.21296	5.62151	6.31071	6.66909	6.0999
CSTA	4.35178	5.15452	4.59008	4.49194	5.27867	5.31007	8.6093	4.39405	4.5822	4.95523	4.69011	4.80556	4.87619	4.98357	5.45918	8.31896	5.2958	4.84586	5.28339	5.50661	6.54341	5.44515	6.01021	8.29521	5.62742	6.04484	6.01586	5.16714	5.37528	8.6517	5.45663	6.54112	8.46975	5.97626
CTSS	4.65486	4.56846	4.86133	4.94148	4.9487	4.8264	5.68291	5.35526	5.04376	4.96754	4.97527	4.72368	4.86291	5.38676	5.50289	5.00307	5.04853	5.9055	5.57671	5.4862	5.61903	5.72732	5.85825	5.09706	6.3773	5.21581	6.80072	5.72834	5.89043	5.61849	6.6023	5.75638	6.36438	7.9462
CYBB	4.68263	4.80289	4.81339	4.90986	4.8019	4.75941	4.9041	5.20092	5.01245	4.7461	5.08165	4.53049	4.88998	5.05369	5.10592	4.75755	5.04044	5.01854	5.13564	5.30702	5.45914	4.92986	5.64197	5.30777	5.99119	5.32625	5.81797	5.39983	5.70293	5.19661	5.74736	5.51943	5.49416	6.92295
DOCK2	4.75614	4.92122	4.60809	4.5592	5.10903	4.41507	4.75628	4.58193	4.89423	4.72202	4.46587	4.88092	4.94303	4.8941	4.47903	4.77042	4.92323	4.61298	5.15814	4.8884	4.79112	5.10178	4.90845	5.37151	5.621	5.22596	6.01025	4.89023	5.11307	5.19185	5.2437	5.2706	5.7572	5.64815
EMP3	5.6584	8.13478	9.94633	8.12266	8.85031	10.4573	8.63291	8.59031	8.71153	9.77005	8.81418	9.01955	9.68054	7.90525	9.20481	9.91821	9.88629	9.10946	9.97129	8.432	6.52791	9.07812	8.75853	7.65349	9.36774	7.93651	9.0174	8.91831	10.1072	7.89988	8.76868	7.75577	8.70112	8.9327
EVI2B	4.87507	5.48305	5.17435	5.10765	5.50872	5.54628	5.37752	5.61247	5.29257	5.47911	5.87377	6.45265	5.2311	5.52131	5.36008	6.03965	5.75288	5.68158	6.50109	5.77199	6.38083	7.91016	7.01612	6.30991	7.40545	6.12619	6.39214	6.25625	7.07215	6.48692	8.29761	6.52782	7.03375	8.1935
FCER1G	6.68349	6.98442	7.2326	7.13289	6.692	8.10238	7.90725	7.74454	7.7591	7.38647	8.20682	7.82479	7.10643	7.8936	7.87964	8.6404	7.55065	7.94719	8.41289	8.46564	7.61396	8.48601	8.50802	8.78462	9.78843	7.65543	9.14521	8.61791	8.99668	7.77427	9.60757	8.07585	8.8641	9.65317
FGL2	4.82237	4.96479	4.95881	4.86829	5.15922	4.73882	4.98704	6.18146	4.97459	5.3208	4.94955	4.7105	5.08022	5.61212	5.3469	5.41915	5.15371	5.07505	5.78556	5.28182	5.3212	5.13675	6.02201	5.62505	5.64239	5.57059	5.013	5.94361	5.24582	6.00348	6.8754	6.34303	6.12543	7.40395
FGR	6.36209	5.62087	6.04631	5.92519	6.22346	5.93796	5.81569	5.69931	6.16472	6.8524	6.39046	5.73619	6.41219	6.21122	5.97096	5.62753	6.45925	6.014	6.18405	6.17907	6.37454	6.17862	5.77788	6.32008	5.58112	6.55535	6.35482	6.23304	6.20618	6.26101	6.50637	6.57656	6.925	6.37813
FLI1	4.54289	4.8131	5.1027	5.03407	4.83807	4.87695	5.36975	4.73223	5.39832	4.74976	4.9835	4.9239	4.79713	4.92062	5.1803	4.72404	5.04113	4.57416	5.08918	5.10095	5.18771	5.52622	5.08547	4.76464	5.69148	4.76188	5.23592	5.54951	5.1747	4.99163	5.18242	4.83116	5.06819	5.68965
FYB	5.06745	5.39471	4.99663	5.03903	5.20966	5.21527	5.02934	5.27094	5.2617	5.10218	5.14737	5.27261	5.41356	5.20134	5.09127	5.15217	5.09549	4.88743	5.09167	5.22142	5.42106	4.97315	5.20433	5.24793	5.29898	5.58871	5.48644	5.89191	5.53058	5.31217	5.30822	5.7534	5.31563	6.10912
GBP1	4.59929	5.50641	4.73204	7.68118	5.02909	6.42124	7.04024	7.10848	5.16792	5.17671	5.69854	4.93576	5.19519	5.13625	6.53224	5.70292	8.19079	8.65914	4.39207	7.36566	6.05986	5.55289	6.28826	6.1428	5.53907	5.7426	9.10282	6.28281	5.84921	5.77403	7.97536	6.79788	6.98746	8.08838
GBP2	5.57595	5.58554	5.36904	6.20029	6.80779	6.14995	5.78877	6.3497	5.44599	5.6493	5.55537	7.10125	6.235	5.86913	6.16984	6.02418	8.26538	6.91164	7.41601	6.77224	6.63557	6.74623	6.33514	7.31397	6.62925	7.58753	7.95104	6.23498	6.46661	8.04786	7.7184	7.84279	8.66221	7.25089
GIMAP4	5.35146	5.883	5.55648	5.55065	6.20204	5.64176	5.88462	5.6583	5.78514	6.05299	5.71102	5.7643	5.8012	5.65379	5.84112	6.14581	5.39718	5.7492	5.8015	5.867	6.69913	6.30574	6.25477	7.06178	6.25965	6.50788	5.86045	6.86585	6.48784	6.09097	6.83745	6.42297	6.36535	6.36678
GIMAP6	3.8729	4.26302	4.58659	4.55056	5.26428	4.30845	4.67105	4.48039	4.2338	4.7019	3.96956	4.28423	4.38748	4.28849	4.51703	4.45903	4.20934	4.55771	4.25553	4.523	5.74737	5.28183	4.80571	5.75879	5.42555	4.6897	4.5897	5.80337	4.6938	4.93838	7.19618	4.96801	5.31711	6.02425
GLRX	5.93573	6.69073	6.63935	7.08269	6.42836	7.16801	7.62303	6.86233	7.19745	6.81254	7.61013	8.26193	6.51142	7.05103	6.89575	7.32076	7.24345	7.6705	7.28217	7.12336	7.13082	8.24528	7.65725	7.31792	7.74072	7.21071	7.11311	7.42905	7.80109	7.04915	8.58812	7.55377	7.83623	8.11618
GMFG	5.93581	7.39178	7.78777	6.7095	7.5215	9.2113	6.82039	6.23029	7.21863	7.40067	7.51937	7.92033	7.32356	7.59178	7.2157	6.78158	7.60605	7.05901	6.50813	6.75108	6.53452	7.35906	7.54045	6.99237	7.18442	7.77829	7.24754	7.39848	7.08028	8.68759	8.30073	8.18545	9.37286	8.10647
GMIP	6.7153	5.35295	6.31775	5.87894	6.23344	6.03429	5.91183	5.41281	6.21032	6.10637	6.26127	6.65882	6.59403	6.06086	5.95175	6.6886	6.22735	6.08551	5.88629	6.15846	5.71751	6.44218	6.46095	6.38888	6.06173	6.38682	6.18962	6.50388	6.28596	6.21788	6.24425	6.41684	6.65586	6.3171
GNLY	4.7458	4.73212	4.6119	4.70159	4.72896	4.76079	4.76448	4.84236	4.75186	4.78506	4.79887	4.7488	4.8931	4.75359	4.77549	4.69928	4.95802	4.70249	4.59702	4.89444	4.82825	4.95923	4.66212	4.90421	4.63118	5.2934	4.90875	5.25657	4.87855	5.08602	4.94087	5.02223	5.23952	5.18606
GPR65	3.93067	4.16172	3.93086	3.79362	4.01587	3.88612	4.12793	4.0942	4.08627	4.0941	4.04372	3.82684	4.15731	3.91257	4.42588	3.83149	4.04121	3.97284	4.2384	4.41773	4.53189	4.39506	4.90697	4.69361	4.42255	4.65216	4.69306	4.3282	4.4713	4.62281	5.28112	4.29449	5.03537	4.87139
GZMB	4.11277	4.38726	4.00256	4.14062	4.32001	4.09762	3.96972	4.48962	4.28393	4.10928	4.12979	4.09354	4.50903	4.29576	4.08373	4.07929	4.23212	4.16151	4.62865	4.47907	4.38077	5.97212	4.1786	5.02765	3.9289	5.29332	4.1907	5.00668	4.17624	4.75681	4.16005	5.00439	6.61085	5.58454
GZMH	4.74153	5.95589	4.80313	4.70176	5.11611	4.87096	4.75488	4.95508	5.28492	4.81778	4.73169	4.97697	5.50439	4.80083	4.85765	4.82168	5.26688	4.5792	4.77634	4.91488	6.03142	4.99181	4.99255	4.97167	4.74327	5.87826	4.97071	5.53404	5.31493	5.03644	4.89736	5.71952	5.61108	4.8067
GZMK	5.69128	6.4507	6.02819	5.81222	6.21029	6.09581	5.75568	6.11264	6.27248	6.47751	6.21495	6.06752	6.37473	5.77638	6.08169	6.62541	6.40123	5.4582	5.6718	6.09021	7.18976	5.95729	6.05051	6.87551	6.90895	7.79547	5.98725	6.90231	6.37653	6.35955	6.37397	6.99555	6.58695	6.18876
HCK	4.97882	5.14648	4.80747	4.97435	5.44292	4.56853	5.33847	5.39156	5.23047	5.0509	5.12373	5.50783	4.92761	5.25585	5.73322	6.03235	5.18334	5.19092	5.79275	5.51118	5.62473	5.51007	6.10373	6.00688	6.60587	5.68609	6.37726	5.4373	6.08586	5.98091	6.76668	6.21462	6.22419	7.01426
HCLS1	4.7951	6.3006	5.91936	5.4564	5.80792	6.20884	7.04912	6.21565	5.8712	6.24311	6.26484	7.19019	6.16249	6.19788	6.39288	7.86065	7.41755	6.45867	6.65674	6.62886	6.65753	7.12676	7.39455	7.26137	7.89733	7.11056	7.32093	7.49169	8.13953	7.57536	7.69784	7.28551	7.30676	8.08176
HLA-B	8.19581	9.04795	9.857	10.517	9.91657	10.0794	10.7113	10.9285	11.769	10.2749	10.4144	10.7238	10.1261	10.3843	11.1341	11.6251	9.51596	12.5216	9.79884	11.8096	7.20162	11.16	10.7276	9.44877	11.6538	10.0828	12.1138	12.6387	11.5913	9.08848	11.8125	9.74475	10.7762	12.8004
HLA-DMA	5.87306	6.10262	7.43512	7.23935	7.00111	7.1512	7.66649	7.55573	6.86965	7.40122	6.99892	6.10098	6.51586	7.37052	7.77391	7.0506	6.21449	7.08844	7.54588	8.05609	5.36408	7.63457	7.77066	6.49862	8.71528	6.89679	7.89889	8.12607	8.98785	7.43868	8.38431	7.60244	9.09459	8.95119
HLA-DPA1	6.61918	6.36257	7.8378	6.68977	7.72235	6.56047	7.40343	7.17795	7.28193	7.9148	6.6193	5.93176	6.31593	8.24246	7.96699	7.21975	6.91725	7.69781	8.56094	8.15371	7.94569	7.66345	8.25037	8.36831	8.70928	7.65816	7.88768	8.50211	8.46553	8.39989	8.69531	8.35398	9.18736	8.81498
HLA-DPB1	7.94963	7.43244	9.2664	8.48255	8.84561	7.54447	8.82757	9.61507	8.77183	9.10424	7.52249	6.88201	8.2748	8.98971	9.64865	8.52364	8.41135	8.44367	9.98562	8.82028	9.35947	8.18499	9.40566	9.15393	8.93689	8.83793	8.61837	9.39588	10.9428	10.3375	10.387	9.73332	10.9262	9.3703
HLA-DRA	7.33494	6.32834	8.40453	8.28772	7.26364	6.29273	8.48405	9.57113	8.57847	8.11577	7.59194	5.75329	6.24901	8.88415	9.12808	7.94918	6.82935	8.79616	9.38478	9.08568	6.62796	8.35822	8.88077	7.02986	10.3284	7.07975	9.16596	9.97277	11.0247	6.49695	9.66426	7.46624	9.13252	10.253
HLA-E	7.52385	7.51132	8.14431	8.51034	8.58928	8.41366	8.51383	8.66401	9.05322	8.84808	8.46259	8.73503	8.57574	8.92428	9.11797	9.32557	9.04285	9.35778	8.26425	8.8664	7.7924	9.11457	8.99904	8.39529	9.49221	8.98678	9.13834	10.0343	9.31754	9.29637	9.79971	9.28917	9.63864	10.313
HLA-F	6.73443	7.59932	7.66718	7.77055	7.72772	7.67994	7.767	8.19554	8.65705	8.06854	7.87905	8.17547	8.02394	7.95518	8.36445	8.64684	7.90926	8.99764	7.57126	8.54693	7.6899	8.23829	8.04949	8.08758	8.29469	8.43659	8.83775	9.3156	8.37032	8.18875	8.94297	8.8488	8.66654	9.25065
HLA-G	8.03264	8.14804	8.64723	9.22842	8.72497	8.88739	9.13989	9.20676	9.68007	8.97885	9.27428	9.17657	8.83751	9.22804	9.50127	9.66912	7.99805	10.4005	8.88263	9.89179	6.93558	9.50242	9.43714	8.47385	9.65031	9.08327	10.008	10.4268	9.77554	8.38907	10.0578	9.25268	9.48023	10.5777
IKZF1	4.65427	4.80903	4.76355	4.6353	4.81424	4.79922	4.70692	4.80625	4.81757	4.77263	4.83514	4.70377	5.03247	4.70281	4.73939	4.67115	4.87872	4.53044	4.67592	4.73497	5.03137	4.71415	4.83669	4.91678	4.72124	5.0064	4.79235	5.17685	4.99652	4.8081	4.77415	5.02812	4.93878	4.89343
IL10RA	5.98967	5.84863	6.33304	5.9083	6.42957	6.24911	6.2218	6.2692	6.51138	6.35117	6.2127	6.38755	6.54217	6.20071	6.77933	6.23536	6.94046	6.31545	6.6481	6.5314	7.08129	6.60812	6.9307	7.70904	7.49603	7.25726	6.40992	7.05789	7.45397	8.79631	7.99256	8.35246	8.02155	7.52131
IL18RAP	4.08513	4.53106	4.16586	4.10579	4.78255	4.14462	4.26035	4.16754	4.40878	4.42576	4.37702	4.17313	5.00575	4.27428	4.18235	4.25393	4.6722	4.09042	4.13067	4.41293	5.67702	4.10393	4.3994	4.52678	4.17535	4.69604	4.18218	4.61298	4.29817	5.12092	4.43091	4.88284	4.87164	4.21684
IL2RB	6.85339	6.62151	6.69324	6.81444	6.82319	6.70809	6.57548	7.14537	7.0124	6.77541	6.99	7.27682	7.05411	7.04005	7.04631	7.01469	6.84281	6.59421	6.87343	7.30876	7.15805	7.32267	6.84344	7.57173	7.33162	7.62278	6.68341	7.64204	6.6653	7.28435	7.45824	7.72436	7.71943	7.47853
IL2RG	7.05232	7.21737	6.77181	6.99618	7.37663	7.11954	7.11933	7.51601	7.42221	7.01835	7.40425	7.11809	7.57442	7.24623	7.28353	6.90841	7.07678	7.30528	7.44729	7.33581	7.73949	7.49953	7.22023	7.19552	7.05354	7.53012	7.51378	7.77065	7.60905	7.49067	7.44015	7.91915	8.06872	7.97785
IL32	6.33739	5.7099	5.27535	5.21081	6.1455	5.63198	5.65349	7.25985	5.56096	7.09278	5.4644	5.89903	5.64501	5.29964	6.19306	5.391	5.92668	5.94731	5.39235	6.14394	5.78916	6.31633	6.34462	5.88915	5.49561	6.00955	6.61168	6.22819	6.27942	5.77352	6.21265	6.17984	7.17754	6.44021
IL4R	6.7413	6.1883	6.51788	6.29929	6.24196	6.60575	6.01412	6.05252	6.62156	7.10447	6.06494	6.75413	6.74723	6.55926	6.38657	6.65043	6.88417	7.10709	6.72023	6.36025	7.00916	6.48961	5.94871	6.78078	6.80242	7.40813	7.02388	7.24265	7.63693	7.28175	7.14891	7.75575	7.22338	7.04868
IL7R	5.67336	5.74365	5.27033	6.02533	6.26416	7.43964	5.36648	6.88486	6.32483	6.08911	6.35199	8.4597	6.89483	6.50315	7.57125	7.23858	5.91347	6.72677	5.64985	6.10567	6.31818	5.92922	5.96374	5.46551	5.79641	6.61466	9.51818	7.24767	7.61411	7.6744	6.7832	7.23963	7.06462	7.18167
IRF8	5.35784	6.00488	5.89244	5.19426	6.57982	5.65622	5.63647	6.1704	5.78906	5.95995	5.40314	6.00632	6.33104	5.75115	6.38126	5.67123	5.94623	5.62611	5.79396	5.90638	7.37652	5.78673	6.23479	7.23748	6.73237	6.8588	6.29489	6.38661	6.70696	6.77688	6.71739	7.10413	7.16737	6.55557
ITGA4	4.11894	5.64398	4.45659	7.72125	4.19633	5.66208	5.60485	6.36069	5.97311	5.94116	6.4042	4.75768	4.19862	4.31155	4.93325	5.80796	4.39113	6.07588	4.22194	5.34392	4.57315	6.25749	6.33557	5.64269	7.78223	4.55491	6.05234	4.56708	4.51152	4.18493	4.98789	4.55141	4.49278	6.05478
ITGAL	4.37926	4.65178	4.3774	4.29882	4.5006	4.33476	4.22792	4.53053	4.35336	4.34829	4.27205	4.30319	4.44127	4.44952	4.41583	4.31695	4.27281	4.25359	4.22944	4.40642	4.51194	4.23799	4.8913	4.95816	4.35366	4.48114	4.32281	4.53315	4.62937	4.92133	4.59965	4.76522	4.71589	4.86774
ITGB2	5.36547	5.55294	6.36553	5.58438	5.93086	5.12018	6.177	5.99155	6.06407	5.91666	6.417	5.42571	6.0306	6.54079	6.83745	8.09266	6.01846	6.33161	6.21928	6.72541	6.33447	6.91656	7.46563	6.77361	7.8831	6.18694	7.61743	7.10889	8.45852	7.36145	7.58576	6.64487	7.38591	8.22073
ITK	4.71256	5.07833	4.95807	5.44063	4.84212	5.27827	5.22611	5.45753	5.71528	8.41797	6.33598	5.61821	4.78918	8.1873	4.77575	6.24189	4.97221	4.63742	4.76412	4.80446	5.21867	5.6125	5.63106	5.39335	5.1313	5.14122	5.12806	5.5433	5.167	5.09129	6.24009	5.13538	5.13086	5.38831
KLRB1	5.01122	5.0663	4.88425	5.0011	5.16833	4.82849	4.82187	5.04619	5.40841	4.73404	4.89955	4.84456	5.06579	4.78344	4.91767	4.64262	5.03072	4.59908	4.92128	4.99539	6.10938	4.99785	4.45042	5.69778	4.98652	5.29229	4.93543	5.46708	5.13901	5.27005	5.13795	5.87644	5.95889	5.2815
LAIR1	6.26279	6.75991	6.46532	6.4626	6.25818	6.5674	6.56188	6.60596	6.62627	6.30057	6.36091	6.09508	6.57772	6.44099	6.36149	7.02225	6.69943	6.07504	6.27308	6.72134	7.11561	6.63539	6.68845	7.0505	8.03454	6.95218	6.66259	7.21594	7.06536	6.85665	6.77468	7.33216	6.8801	7.09254
LAPTM5	7.43818	7.46149	8.04419	8.21545	8.14249	9.45591	8.33784	8.87006	8.82842	7.74194	9.68128	9.40307	8.03024	9.16311	8.97067	8.9853	8.11675	9.24507	9.22302	9.32291	7.91131	9.55762	9.65201	8.7972	10.9604	8.82668	9.95178	9.9181	11.1786	9.47438	10.394	9.50993	9.93705	11.0032
LCK	5.09692	5.11461	4.95305	4.91809	4.9767	5.3349	4.90521	5.1627	4.92231	4.88511	5.01494	4.8776	5.21535	4.95453	5.0865	4.8574	5.15256	4.81851	4.80914	5.19449	5.54742	4.91639	4.84741	5.34471	4.87109	5.83781	5.06472	5.41037	5.1157	5.54669	5.19661	5.95818	5.73954	5.2357
LCP2	4.69542	4.79174	4.57512	4.77687	4.93946	4.4755	4.85807	4.94448	4.91737	4.89972	4.99807	4.69854	5.0467	5.03045	5.3451	5.02187	4.68293	4.73975	4.84896	5.00958	5.34581	5.01472	5.32373	5.44899	5.23367	5.44613	5.87658	5.41322	5.77795	5.12906	5.80358	5.54664	5.54569	5.91223
LGALS9	5.5493	5.9554	5.97111	6.02904	6.12781	5.92965	6.15207	6.25207	6.10149	6.24747	6.20566	5.93528	6.32831	6.47339	6.43886	6.64098	5.83469	6.20282	6.02426	6.16976	6.2511	6.47446	6.78186	6.08131	6.53579	6.6739	6.24552	7.34614	6.53406	6.92897	7.10494	6.93632	6.95048	7.13138
LILRB1	6.68506	6.5737	6.13095	6.38657	6.64268	6.54297	6.21414	6.56396	6.92214	6.28151	6.66242	6.44197	7.16713	6.76501	6.62463	6.23783	6.5949	6.30034	6.56613	6.76006	6.7607	6.86184	6.87956	6.47431	7.06875	6.60508	6.42325	7.0463	7.00273	6.86551	7.02017	7.14375	7.22229	7.61917
LILRB2	4.76308	4.89788	4.6975	4.80684	4.85666	4.77145	4.66862	4.91156	5.145	4.79667	4.88995	4.85636	5.0599	5.21025	4.87606	4.64189	5.03012	4.97793	4.84971	4.97502	5.18165	4.96798	5.04377	5.21106	5.14994	5.21521	5.0607	5.19197	5.55403	5.45606	5.4826	5.82979	5.81382	5.83852
LPXN	6.03871	6.47429	6.77457	6.25917	6.129	6.67935	7.03039	6.40688	6.63757	6.16121	6.22956	6.17009	6.39741	6.31203	6.46475	6.3886	6.46969	6.33021	6.93462	6.70946	6.97855	7.05001	6.69922	7.40512	7.27066	7.40941	9.15726	7.22322	8.43059	6.68602	6.90141	7.04104	7.32062	7.2755
LSP1	7.22822	6.89203	9.81869	8.85026	7.67752	7.05228	7.54823	6.30365	7.43243	7.2135	7.37539	7.44265	7.87893	7.2546	7.38983	6.91673	8.10443	8.58462	7.57662	8.51926	7.38015	7.93815	8.06025	7.29232	6.91358	7.31723	8.45532	7.53203	8.3578	7.80855	7.46689	7.92524	7.81096	7.20837
LST1	6.61792	7.08672	6.41143	6.59938	6.70115	6.70112	6.44928	6.92006	7.01634	6.55764	6.90933	6.88782	6.96307	6.94693	6.95072	6.55631	6.68708	6.52804	7.13597	6.91842	6.98055	6.94557	6.98368	7.046	7.01164	7.36001	6.94961	7.3131	7.43607	7.31517	7.48021	7.71479	7.71835	7.71791
LTB	5.2959	5.66482	5.21919	5.12962	5.74627	5.44898	4.87703	5.49773	5.48756	5.51908	5.54309	5.67222	5.73141	5.53569	5.31178	5.31438	5.526	5.45767	5.22471	5.29805	5.73442	5.23094	5.2277	6.02984	5.33334	5.98787	5.25959	5.47243	5.36705	6.25962	5.66687	6.14063	6.69158	5.89379
LY96	4.01889	5.18476	5.57952	6.62894	6.13949	6.30642	6.47239	5.32237	4.95569	6.01854	5.22908	5.67892	5.14081	5.07555	5.89782	6.3489	5.71852	8.49328	6.77131	7.24768	6.58009	6.8065	7.38786	7.83418	6.34271	6.17724	8.4743	7.39486	7.07642	7.88163	7.4418	7.23812	7.48034	7.97961
LYZ	6.24776	6.1054	7.79775	6.5158	6.66765	6.50148	8.21076	8.22646	7.24928	8.47553	7.93708	6.48369	6.44316	8.05733	8.08817	6.56518	7.45236	10.1711	8.46978	8.44426	8.86985	9.0558	8.28167	8.87943	8.98882	8.52726	9.0263	7.63309	8.97414	8.52395	9.50832	9.52486	10.267	10.2226
MAFB	5.9794	8.33816	10.1143	9.83178	9.33066	9.09144	9.66217	7.701	9.09966	8.57588	8.70581	10.3007	8.66279	9.99308	10.6066	9.30706	9.73083	11.0391	11.1839	10.2886	8.48375	9.76991	10.1312	8.91897	10.4946	9.17041	10.0909	9.3025	9.38585	8.98848	9.99935	8.53605	9.54814	10.4466
MFSD1	6.75145	7.43715	8.551	8.80656	8.38643	8.47589	9.66506	8.43637	8.00058	8.51921	8.60375	9.38836	8.15687	8.52221	8.56605	8.88424	8.24957	8.78502	8.78049	9.51653	8.49334	9.28967	9.07334	9.40897	9.39777	8.15248	9.24137	8.8078	9.02858	9.24734	9.35245	8.67651	8.93131	9.5878
MICAL1	7.85048	5.45126	5.48709	4.59382	5.0115	5.24373	5.23529	4.57788	4.58865	5.98282	5.12967	5.44698	6.14917	5.21717	5.67462	5.04073	6.76634	5.04094	6.29266	5.33847	4.80079	5.4434	5.62746	5.9851	5.24741	6.19985	5.21564	4.74684	6.10238	6.83422	5.3285	6.04804	6.44032	5.49194
MNDA	4.28475	4.39465	4.23712	4.43288	4.73649	4.45381	4.93813	4.68571	4.20157	4.85592	4.40455	4.30558	4.63545	4.25389	4.85852	4.26059	4.75317	4.6831	5.19156	4.92955	4.97927	5.19838	5.73758	6.28347	5.05749	5.05776	5.9184	4.79144	5.10654	5.4966	6.05451	5.59116	6.09184	7.88117
MSN	7.33558	9.08147	10.2322	10.3462	8.66803	9.67541	10.2866	9.5938	9.62201	10.4564	9.64587	9.52948	8.4757	10.0615	9.64114	9.87669	8.92134	10.2122	10.0834	10.4165	7.57598	9.72175	9.99911	8.75041	9.75479	8.48433	10.0753	9.95809	9.63153	8.74272	9.89239	8.12551	9.07582	9.9933
MYO1F	6.89991	6.90021	6.53806	6.70112	6.87441	6.69637	6.92987	6.72066	6.94976	6.61737	6.98988	7.11757	7.29977	6.81899	6.95177	6.81536	7.37388	6.68171	7.00736	7.00669	7.96794	6.95888	7.29476	7.21162	7.43331	7.44736	7.2022	7.34742	7.49793	7.76689	7.25644	7.84048	8.03227	8.11498
NCF2	4.99807	5.12751	5.05908	4.56205	5.07123	5.11612	5.24503	5.19299	5.23692	5.35996	5.09219	5.11065	5.1693	5.38847	5.42962	5.33071	5.11832	6.3432	5.2738	5.43993	5.60214	5.36123	5.61636	5.73262	5.56975	5.71587	6.4354	5.43492	6.44367	5.9523	5.60928	5.95285	6.33282	6.71276
NCF4	4.84012	4.97804	4.97648	4.75959	4.85077	4.89291	5.23711	4.94983	5.14024	4.73883	4.99277	5.00246	5.08396	4.86806	5.00679	5.20584	5.02973	4.90367	5.13553	5.33752	5.26487	5.18002	5.16897	5.38048	5.7042	5.24178	5.27162	5.43486	6.01607	5.60813	5.88675	5.37169	5.8031	6.15563
NCKAP1L	6.33095	6.76056	6.16841	6.36974	6.65863	6.20694	6.05432	6.57784	6.52578	6.09166	6.56809	6.45909	6.68137	6.61916	6.65288	6.21505	6.44337	6.48844	6.4935	6.46132	6.47249	6.73716	6.9944	6.32901	7.13352	6.71469	6.47841	6.61358	6.70013	6.7408	7.55823	7.09444	7.39981	7.30471
NFKBIA	7.50576	7.73227	9.61502	9.36547	8.74329	9.24521	8.39699	8.75953	8.99777	9.99353	8.63892	10.0342	9.19464	9.13558	9.17461	9.39824	9.31117	9.07559	9.55668	8.72379	5.78285	9.00523	8.67702	8.89796	10.042	10.5732	10.7278	9.41661	9.69952	9.42368	10.0627	10.6952	9.67244	9.50746
NKG7	4.24092	3.928	3.97306	3.95685	3.84471	4.0659	3.87434	4.50687	4.02423	3.93979	4.04469	3.97381	4.09705	4.09927	4.05348	4.56583	3.74039	4.04227	3.79916	3.96208	4.63217	3.8965	3.81054	4.19192	4.15757	4.34821	3.99223	4.74971	4.09585	4.40974	4.32864	4.77258	4.44284	4.40942
P2RY14	3.4123	3.48952	3.3578	3.39645	3.42168	3.41159	3.51857	3.50041	3.48219	4.02052	3.47093	3.23602	3.40174	3.37287	3.46692	3.27378	3.43585	3.40229	3.40053	3.34495	4.31427	3.40919	3.40593	3.52112	3.22713	3.4518	3.35449	3.70367	3.46081	3.71488	3.4563	3.46545	3.57857	3.52133
PLEK	6.65511	7.26853	6.70444	6.77284	6.83803	6.82614	6.89132	7.10223	7.14257	6.86383	7.2424	7.14134	7.25291	6.98643	6.97898	7.03852	6.72649	6.89876	6.72063	7.29231	7.51288	7.44675	7.4697	7.3809	7.32109	7.11152	7.07257	7.64322	7.76934	6.95364	7.66263	7.55308	7.53858	8.24838
PRF1	5.57238	5.61505	5.40267	5.48302	5.45723	5.62919	5.43078	5.78664	5.80251	5.43995	5.54908	5.70564	5.81282	5.64785	5.55241	5.36677	5.81812	5.91886	5.43388	5.60371	5.80867	5.55985	5.54328	5.4422	5.68579	8.19528	5.82293	5.97344	5.56659	5.79343	6.40886	6.13605	6.4129	8.96763
PSTPIP1	4.73221	4.28193	4.62569	5.0254	4.70465	5.37885	4.6639	5.06061	5.01824	4.8119	5.12701	6.17033	5.40762	4.88589	4.98651	5.06979	5.48403	5.08946	5.12133	4.82039	5.28371	5.36257	4.7222	5.2114	5.69225	5.56149	4.97357	5.58042	5.70371	5.66127	5.82424	5.98616	5.61691	5.89516
PTGER2	3.69854	4.13624	4.01773	3.9379	4.09345	3.91793	3.90334	3.87419	3.73929	3.80675	3.69167	4.01278	3.9543	3.88639	4.01456	4.10078	4.28614	5.23234	5.67334	4.07768	4.85927	3.96507	4.04032	4.23657	4.43719	4.17723	5.28717	4.11392	4.33113	4.9635	3.95314	4.31753	4.50913	4.01268
PTGER4	5.15273	5.10044	6.01401	5.28168	6.24101	4.88551	5.41029	4.9317	5.12541	5.466	4.93912	5.19962	5.51678	5.04708	5.57763	5.81331	6.38611	6.64295	5.14978	6.11153	5.86522	5.36591	5.67522	6.26891	5.57129	5.94351	6.11745	5.56484	5.70623	6.38709	6.6547	6.49596	6.3849	5.89543
PTPRC	4.84709	5.02035	4.98568	5.12983	5.06856	5.14896	5.21987	5.99738	5.25203	5.1144	5.88627	5.41454	4.7858	5.735	5.70102	5.20189	5.36183	5.80236	5.63078	5.4342	5.41023	5.77013	6.18715	5.76383	7.64893	5.84766	6.40989	5.87307	7.1881	5.75068	7.16046	6.6035	6.54249	7.94382
PTPRCAP	5.80992	6.2391	5.72798	5.63425	6.16753	5.75779	5.54042	6.07732	5.88533	5.66295	5.72345	5.7719	6.44934	5.81307	5.6374	5.78965	6.08613	5.45143	5.29771	5.65068	6.30207	5.70437	6.0141	5.62377	5.5721	6.66106	5.53804	6.02072	5.88267	6.41015	5.90785	6.92194	6.95258	5.69574
PTPRE	6.02136	6.17886	6.14151	6.11436	6.59499	6.41074	6.3461	5.70528	6.49727	6.54997	6.98881	7.07632	6.32684	7.51677	6.54068	6.90095	6.22887	6.94185	6.58396	6.83599	6.56826	7.72112	7.61629	7.61649	7.6006	6.88094	7.2529	6.91055	9.42872	6.36762	8.23151	6.81037	7.48197	7.81916
PVRIG	5.68974	6.52186	5.47005	5.6989	5.89361	5.46809	5.42918	5.37345	5.59331	5.36184	5.6108	5.77784	6.05583	5.80646	5.54854	5.46918	6.06145	5.29401	5.58875	5.81079	6.64477	5.5778	5.5622	6.28719	5.77016	6.23283	5.51137	6.38253	5.59919	6.48005	5.82227	6.89447	6.7011	5.7784
RAB27A	5.72748	6.08614	7.15907	6.64035	6.62132	6.25726	5.85803	6.18046	5.70769	6.47325	5.81559	7.20713	6.42077	6.2116	6.42611	6.60693	7.25433	7.59459	10.9611	7.40749	6.80315	6.83603	6.90731	7.05808	6.3734	6.71458	7.34038	6.7172	6.71203	6.89256	6.51766	6.74103	7.11065	6.80931
RABGAP1L	4.96321	5.70804	5.40881	5.41221	5.7209	5.87757	6.77783	4.82459	4.87737	5.65638	5.11499	6.30927	5.7346	5.4597	5.71075	5.8436	5.5931	5.61822	5.18181	5.31052	6.08471	5.49037	5.58812	6.15166	5.70746	5.92732	5.03665	5.15118	5.20188	6.09788	5.58878	6.03192	5.77587	5.38412
RAC2	6.28211	6.30219	6.20216	6.96155	6.66599	6.96103	6.12844	6.84817	6.68858	6.1591	7.4985	7.39792	6.86133	6.98683	6.71563	7.1189	6.96784	6.92717	7.18765	7.20612	6.88717	8	7.63713	6.57031	7.57772	6.80657	6.96922	7.17787	7.54397	7.13846	7.99634	7.24401	7.53198	8.61856
RASSF2	5.14203	6.1253	5.6264	5.54941	5.53704	6.48098	6.23148	6.03103	6.27181	7.10753	5.91273	6.31476	6.05355	6.12214	5.98516	5.93916	5.81476	5.71598	5.36751	5.74116	6.55441	6.08416	6.02879	6.17862	6.1525	6.27244	5.84681	6.68405	6.36335	6.69271	6.54275	6.46031	6.2265	6.72995
RGS1	4.15798	4.36963	4.72921	3.6914	4.15678	4.09275	5.15587	4.83997	3.83203	4.15741	5.34575	4.13183	4.5601	6.54752	5.10272	4.90806	4.93819	5.15712	6.63078	5.14462	4.89616	4.17601	5.53349	4.90594	4.73252	5.07048	4.94928	4.79783	5.37171	5.15223	5.00334	4.84853	4.98772	4.98304
RHOG	7.21608	7.79721	8.0411	7.98293	7.6657	8.02448	7.46155	8.0037	7.52242	7.80094	8.08746	8.15475	7.93653	7.64664	7.71813	8.06642	7.65135	7.76129	7.94153	7.86073	7.92263	8.25434	8.20941	8.0561	8.03696	7.7116	8.07053	8.49747	8.487	8.29533	8.16125	8.12565	8.28489	8.2808
RHOH	6.0682	6.82308	6.20736	6.05843	6.50192	6.46454	6.17967	6.27724	6.5002	6.36616	6.18393	6.42718	6.88589	5.92173	5.97577	6.24006	6.17531	5.69015	6.36356	6.15644	7.20983	6.12411	6.26391	6.36008	7.07079	7.19037	6.2549	6.52651	6.48645	6.55303	6.05495	7.49671	6.67095	6.35044
RNASE6	5.10081	4.8719	5.57991	4.96058	5.87732	6.11591	5.59878	5.62137	5.51126	5.49788	5.85463	7.08756	5.63631	5.90809	5.89136	6.11976	5.80694	6.26771	6.6077	6.26019	6.73381	7.08964	6.50593	7.01249	7.52694	6.75451	6.13387	7.22056	7.62024	6.52529	7.90787	7.20023	7.04644	8.09025
S100A8	4.78387	4.0023	3.72098	4.07208	4.09472	3.96434	4.68693	3.95647	4.3433	5.04433	4.4903	4.06173	4.03978	5.11984	4.27577	3.78966	3.92839	4.53033	4.12018	3.94834	4.23151	4.63588	4.40965	5.21663	4.58877	4.44508	6.0802	4.13436	4.24389	4.96828	5.11697	4.93874	6.90924	6.38157
S100A9	4.10663	4.5405	4.05129	4.27629	4.51716	4.39071	4.41131	4.06071	4.27395	4.48806	4.62238	4.29792	4.51061	4.83112	4.40855	4.02986	4.48346	4.64257	4.50967	4.31687	4.62177	4.68356	4.45786	5.43669	4.67324	4.4735	6.01095	4.57172	4.52826	4.97903	4.89971	5.81625	6.84405	6.16588
SAMHD1	6.60798	6.79158	6.36803	6.66047	7.1979	6.67318	7.10487	7.11616	7.13499	6.53768	7.06856	6.69215	7.29956	6.76478	7.05531	6.70274	6.92727	6.58333	6.89903	7.30014	7.19588	7.33426	7.39938	7.32161	6.96127	7.22012	7.01385	7.52782	7.0957	7.27354	7.31299	7.11307	7.01391	7.40428
SELL	4.88892	5.35335	4.89045	4.96412	5.1927	5.3352	5.10904	4.71867	5.44381	5.06306	5.4225	5.12674	5.17872	5.12734	4.96956	5.80675	4.83512	4.78438	4.96881	4.8884	5.94623	5.33542	5.22345	5.68565	5.95483	5.63326	4.84938	5.64837	5.2093	5.52988	6.39756	5.82781	5.72408	6.01181
SELPLG	5.91458	6.19749	5.76366	5.92675	6.18528	6.16626	5.76947	5.70954	6.12928	6.23537	6.27944	6.8234	6.50197	6.13684	5.87098	6.15878	6.21313	5.94593	6.08165	6.04309	6.66731	6.32716	6.31315	6.40803	6.1794	6.69849	6.18313	6.20069	6.62885	6.88804	6.67552	6.83966	7.24325	6.86441
SH2B3	5.14833	6.54543	6.19524	6.54134	6.81562	6.39465	7.01047	5.77609	6.48365	6.71277	6.8416	6.82065	5.96631	6.93891	6.66404	6.92564	6.18109	6.75653	9.14701	7.55388	6.81771	7.61831	7.38864	7.20764	7.78666	6.62676	7.47403	7.89761	7.62057	6.71448	7.99849	7.03051	7.06024	7.70441
SLA	6.72073	6.83106	6.79398	6.38666	6.90664	7.01539	6.82873	6.98101	7.27984	8.22103	6.88487	6.64851	7.25363	7.20699	7.16468	6.85121	7.06866	6.79256	7.10892	6.85497	7.41489	6.91966	7.23325	7.20647	7.62339	7.64065	7.72057	7.84685	8.02859	7.92299	7.50611	8.03418	7.93236	7.72821
SRGN	4.95588	5.76673	6.36894	5.90208	5.8014	6.34855	7.36165	6.73632	6.17243	6.134	8.70232	7.70494	6.14652	8.93911	7.19782	7.84838	6.6396	7.89578	8.39197	7.46495	6.92971	8.53808	7.48629	7.32605	7.97633	7.78344	9.41434	8.73656	9.56338	7.38855	8.42346	7.61484	8.31778	9.59219
TAP1	6.37035	7.04592	7.02614	7.54163	7.52222	7.63488	7.31773	8.17004	7.50734	7.82422	7.04454	7.63858	8.22053	7.12796	7.56608	8.22372	8.00006	8.68017	6.66512	7.86874	8.13011	7.46792	7.75693	7.88773	7.61616	8.2441	7.56966	8.11908	7.7391	7.89095	8.22604	8.27755	8.15305	7.80829
TCIRG1	6.00929	6.85809	6.75303	6.65028	6.47877	8.94985	6.49139	6.54349	7.48302	7.74207	8.78291	10.3487	7.91834	7.82256	7.10734	8.62967	8.41481	8.13038	8.28815	7.16363	7.03918	9.17706	8.64094	8.02405	9.23234	8.54257	7.41328	8.18837	9.61136	8.80002	10.4012	9.70782	9.35993	9.87687
TGFB1	5.10462	5.87548	6.67292	6.39545	5.82976	6.69007	6.1164	6.49903	6.77123	6.0268	6.70579	6.37901	6.91177	6.69781	6.72609	6.43018	5.53008	6.15999	5.99503	6.32485	5.27821	6.06025	6.40879	5.1313	6.86728	5.26375	6.64394	6.78572	6.79382	5.19342	6.28878	5.66152	5.6532	6.53214
TNFAIP3	6.11748	6.16983	6.2043	5.7675	6.29366	6.31766	6.31598	6.67347	6.04945	6.14048	6.62419	6.54735	6.3508	6.8748	6.12722	6.1549	6.47415	6.28045	6.54513	6.33847	7.04957	6.44562	6.42017	6.74299	6.69899	7.24679	8.2253	7.23107	6.89	6.18287	6.76593	7.19495	6.67278	7.05463
TNFRSF1B	5.2207	5.48426	5.53484	5.66593	5.74403	5.56055	5.44227	5.53418	5.49132	6.0685	5.49026	5.68389	5.61382	5.98526	5.68794	5.44575	6.40743	5.88664	6.16173	5.64323	5.93535	5.54166	5.66745	5.94376	6.12658	6.67536	6.37891	5.70769	5.94478	6.8816	6.63362	7.22035	6.91369	6.30114
TPP1	6.22603	6.69681	6.62861	7.00659	6.43621	7.26399	6.57482	7.4869	6.88627	6.75877	7.49243	7.34109	6.66111	6.9283	6.73677	7.11051	6.72884	6.68576	7.18937	7.40851	6.88674	7.60636	7.05925	7.50819	7.88952	6.99725	7.81116	7.77299	7.54901	6.81692	7.40014	7.02876	7.08824	8.20225
TPST2	6.42164	6.16056	7.55067	8.11496	7.07589	7.60498	8.06891	6.80017	6.95511	7.85322	7.85758	8.45469	7.88263	6.64507	7.57125	7.46369	7.26771	8.55845	7.27339	9.00278	6.38593	9.49112	8.00281	7.39366	9.28472	8.3211	7.79577	7.9511	7.61706	8.77284	7.84882	7.84839	8.33461	8.78274
TRAF3IP3	4.84902	5.04047	4.80289	4.85287	4.76303	4.70197	4.75867	4.73337	5.09917	4.77709	4.82487	4.80425	5.0965	4.77156	4.84449	4.56007	4.94555	4.68835	4.91205	4.95121	5.27098	4.82721	4.93907	5.15255	4.7351	5.1638	4.72412	5.0846	5.01174	5.50212	4.96436	5.28026	5.69298	5.13503
TYROBP	5.9306	6.04219	7.57294	6.40699	6.4062	7.40692	7.09061	6.7863	7.02486	6.53749	7.68292	7.80702	6.21572	7.51706	7.79677	8.22363	6.6666	7.65872	8.41262	8.06688	5.74849	8.27781	8.54924	8.46764	9.10586	7.48638	8.1639	8.68499	9.7094	8.55596	9.87468	8.35298	8.9117	9.97925
VAV1	5.39894	4.97918	5.40275	5.24429	5.3088	5.29418	5.15494	5.43695	5.32153	5.25132	5.39006	5.13762	5.73266	5.31365	5.44418	5.26035	5.28498	5.30483	5.28724	5.47966	5.09	5.2482	5.31179	5.56997	5.52167	5.42015	5.44313	5.87868	5.49531	6.10103	5.81652	5.94542	5.72393	5.60893
VNN2	4.85167	5.80757	4.57446	4.70674	4.79507	5.17533	4.94024	4.88121	4.71927	5.22611	5.06694	5.22498	5.61898	4.6806	4.79023	4.8643	5.41249	4.79236	4.75503	4.74087	6.46512	5.04136	4.8859	5.48878	4.61474	5.75342	4.84404	5.35223	5.25375	6.18725	5.12179	6.03508	5.91423	5.92197
WIPF1	5.65282	5.87351	6.17228	6.25537	6.35005	5.73794	6.34707	5.00167	5.93613	5.71738	5.59626	6.02092	6.43049	5.83442	6.22316	6.44406	6.47998	7.09645	6.29202	6.17347	6.1269	6.42237	6.48515	6.24219	6.51204	6.22284	6.26876	5.94375	7.31077	6.67987	6.53278	6.04664	6.35166	6.80835
ZAP70	4.70275	4.61969	4.81694	4.59316	5.24039	4.68423	4.56043	4.44171	4.72821	5.14147	4.58379	4.55281	5.93572	4.73163	4.70224	4.68304	5.0325	4.40702	4.48346	4.70394	4.77533	4.82119	4.98013	5.45242	4.49367	5.37614	4.3303	4.72336	4.45051	5.51092	5.25748	5.74051	5.64057	4.55281
NAME	GSM402747	GSM402727	GSM402720	GSM402743	GSM402740	GSM402726	GSM402729	GSM402739	GSM402736	GSM402737	GSM402728	GSM402733	GSM402746	GSM402749	GSM402745	GSM402725	GSM402748	GSM402721	GSM402738	GSM402722	GSM402730	GSM402731	GSM402734	GSM402735	GSM402741	GSM402751	GSM402732	GSM402750	GSM402724	GSM402742	GSM402744	GSM402719	GSM402723	GSM402718
StromalScore	-1.70039	-1.65715	-1.60668	-1.55864	-1.52848	-1.37244	-1.29674	-0.952845	-0.743285	-0.633828	-0.35508	-0.310709	-0.166771	-0.118963	0.145214	0.16145	0.212098	0.262758	0.265196	0.2961	0.334696	0.435215	0.519971	0.545213	0.59012	0.664299	0.753952	0.764022	1.09935	1.17634	1.18605	1.19303	1.6683	1.72863
NAME	GSM402747	GSM402727	GSM402720	GSM402743	GSM402740	GSM402726	GSM402729	GSM402739	GSM402736	GSM402737	GSM402728	GSM402733	GSM402746	GSM402749	GSM402745	GSM402725	GSM402748	GSM402721	GSM402738	GSM402722	GSM402730	GSM402731	GSM402734	GSM402735	GSM402741	GSM402751	GSM402732	GSM402750	GSM402724	GSM402742	GSM402744	GSM402719	GSM402723	GSM402718
ABCA6	4.18435	4.46686	4.01545	3.98264	4.12107	4.0357	4.39065	3.85117	3.80454	3.83024	3.79817	4.02398	4.22895	3.92889	4.27063	4.51634	3.85694	4.42965	3.58533	3.9996	3.94969	4.00995	5.3241	3.87982	4.01996	3.75734	4.3142	4.03663	4.85416	3.80383	4.08733	4.21579	4.66665	4.46243
ACTG2	5.28961	5.19335	5.30058	4.94281	5.36637	4.92635	4.903	5.22376	5.61343	5.38555	5.33434	5.16633	5.46157	5.14673	5.22189	6.08706	8.70914	5.96422	9.73534	6.00054	5.04593	5.42077	5.3268	5.05693	5.63895	5.45438	5.27979	5.32272	5.65553	6.19817	6.11846	6.88355	6.84246	5.62965
ADAM12	6.32397	5.81639	5.23224	5.46213	5.43306	6.42231	6.01733	5.82834	6.92613	5.40641	5.29102	5.83421	5.97204	6.27155	5.88933	5.72066	6.57952	5.78839	7.67099	5.99737	5.4615	6.20752	6.36401	5.88256	5.77377	5.6297	5.86893	5.50672	5.76561	6.9661	5.73331	5.46954	5.80073	6.31121
ADAMTS5	5.84839	6.10137	7.56698	6.16907	6.21039	6.31248	5.39068	6.44472	6.22344	6.64177	5.48848	6.38414	6.60711	7.41038	6.8226	6.47795	6.46627	7.02504	6.99285	5.86566	5.79591	5.29758	6.5267	5.82891	5.5999	6.39568	6.72655	6.53479	6.33841	7.51976	6.69362	5.90328	7.11185	7.2972
AIF1	7.42222	6.47995	7.02408	6.99688	7.30172	6.8157	6.66263	6.7273	6.99858	7.17253	6.63903	6.80834	7.37172	7.42425	7.5604	7.69766	7.37585	6.98238	6.83192	7.01668	7.39063	6.69101	7.75125	8.18868	7.35259	8.25598	7.93805	7.13102	8.10881	7.99882	8.59078	7.74656	8.21832	7.64035
AOC3	4.27122	5.06111	4.91103	5.41624	4.89633	5.33343	6.03929	4.34029	5.76432	5.33381	5.59487	5.70973	5.37166	5.71111	5.00125	5.88141	4.90803	5.34958	5.1142	6.1773	5.41975	5.93065	6.62122	5.91397	6.70752	4.70182	5.39054	5.75311	6.16393	4.79012	5.35531	5.17784	6.84133	5.25963
APBB1IP	4.45286	4.52899	4.4279	4.47001	4.62169	4.35256	4.36507	4.37346	4.23673	4.13914	4.19636	4.18441	4.70217	4.32988	4.50728	4.64715	4.39613	4.60423	4.15423	4.33792	4.32567	4.40521	5.15771	4.60154	4.33975	4.69748	4.43469	4.53115	4.96936	4.52946	5.04543	4.41418	4.7172	4.53139
ARHGAP28	4.52618	4.95806	5.69865	4.65612	4.70385	4.5144	4.64092	4.60529	5.01957	4.53654	4.58471	4.67763	5.25459	4.59341	4.73884	4.96572	4.85608	4.90195	4.49291	4.51113	4.69724	4.40347	5.10945	4.69786	4.63808	4.52244	5.15409	4.70374	4.98308	4.9021	5.01971	4.63415	5.01619	4.77708
ASPN	4.35467	5.7206	6.01907	5.21062	5.98906	5.19258	4.41032	9.47275	10.4869	6.37821	8.92639	6.94925	10.9722	9.23449	10.4598	8.94248	10.5526	9.49065	10.9833	8.44124	9.31073	9.5618	8.96313	4.1838	10.1102	4.08207	8.80679	9.73349	9.66971	6.46124	9.46129	10.6061	10.5124	10.0593
ATP8B4	4.11961	4.05589	3.84054	3.84331	3.81359	3.77876	3.89303	4.23809	3.88743	3.85211	4.02317	3.91219	4.06134	4.026	4.34179	4.23476	3.96492	4.29514	3.73442	4.12863	4.95117	3.74492	4.05936	4.24087	3.88207	4.29223	4.02918	3.88858	4.3299	4.30096	4.11502	4.57946	4.57976	4.38856
BGN	5.55395	8.70633	7.73691	9.43139	8.49194	8.70556	7.94567	7.90227	8.79589	8.48164	9.88053	8.43397	9.36667	7.99072	8.45219	8.43395	9.04567	9.57483	8.92431	9.26436	7.66732	8.88097	8.33636	9.30642	8.9164	8.45029	8.91404	9.49807	8.99648	10.0144	8.53039	9.61849	9.8574	9.28723
BTK	5.60926	5.84669	5.43333	5.48379	5.29129	5.94875	5.70023	5.50863	4.95865	5.21334	5.1748	5.46611	5.73167	5.77861	5.55986	6.38815	5.70029	5.73539	5.07951	5.42012	5.9591	5.26351	6.03748	6.0978	5.49857	5.85664	5.85117	5.63201	6.66035	5.47911	6.71574	5.79352	6.17888	5.81838
C1QA	8.01524	6.06854	8.04144	6.46337	7.30648	6.38332	6.09558	6.08122	6.36058	7.61762	7.43978	7.90073	6.41752	7.68219	8.0943	7.99735	7.90328	6.28714	7.36266	7.41286	9.13141	6.83854	6.72653	9.74221	7.94446	9.54114	7.05751	7.04724	8.32739	9.49216	9.48828	9.56249	8.19594	9.45342
C1QB	7.54211	6.12975	7.78819	5.74416	6.56883	5.78339	5.99751	5.68127	6.01609	6.99297	6.8689	7.93013	6.29971	7.16917	7.52697	8.07401	7.40356	6.22999	6.8434	7.01963	8.87538	7.11984	5.32104	9.38264	7.60817	9.40939	8.99529	6.79802	9.46359	8.94492	9.49382	8.3674	9.17351	8.89293
C3AR1	7.18141	6.15426	5.97455	5.77147	5.93223	5.69314	5.87814	5.65478	5.62912	5.64199	5.89935	6.26388	6.57273	6.55436	7.10183	6.77502	6.64839	6.74988	6.62845	6.45352	7.45253	6.12846	6.95694	7.47351	6.69963	7.02707	7.08045	6.37635	7.39827	6.55976	7.27133	7.90953	7.70866	6.57721
CCR1	6.56557	5.97498	6.0651	6.8099	6.12331	7.36848	7.27516	5.78435	5.80375	6.36255	5.82322	7.46281	6.36979	7.07692	7.08176	7.26719	6.04449	6.22673	6.53069	6.00475	7.35957	5.76932	6.88679	8.63266	6.19578	8.6049	7.69805	5.83723	7.71767	6.82827	7.33995	7.87146	6.50455	7.10683
CD14	8.7057	6.91406	7.15512	7.59214	6.98199	6.3056	6.5121	5.66575	6.82359	8.15644	7.98295	7.58182	6.74686	8.24355	8.69555	8.45606	8.41204	7.73513	8.45238	7.94904	10.1082	6.93094	5.95201	9.73482	8.52943	9.58054	8.56791	7.41452	9.48048	10.0864	10.3614	10.1416	10.3179	8.7966
CD163	6.2911	5.64693	5.97872	6.06361	5.89327	5.69394	5.8909	6.35785	5.94799	6.47945	6.42576	6.93984	5.71881	7.34418	7.14618	7.16536	6.95605	6.10558	7.08245	6.75001	7.99229	6.14877	6.81073	7.70917	6.51498	8.72247	8.61673	5.80845	8.27841	8.58029	8.95365	7.7112	7.81967	7.7429
CD200	5.05175	5.6733	5.65813	5.80991	5.87828	6.62891	5.68662	5.72747	5.34791	6.06876	5.35688	6.13441	5.68587	6.63891	6.02467	6.19188	5.42538	5.2522	5.90632	6.18814	6.85063	6.16086	6.58631	6.901	6.20558	6.68206	6.14248	6.21588	6.30171	5.86166	5.99295	6.00116	6.13112	7.05851
CD248	6.4314	8.01575	7.47285	8.01076	7.89259	8.04192	9.12981	7.54239	8.16976	7.71296	7.36343	8.65731	8.73892	7.53611	8.14365	8.2207	8.49047	7.68644	8.38797	7.89261	8.46871	8.61979	8.16586	8.22097	9.40276	9.06303	7.76971	8.12778	8.72421	9.37963	8.69402	7.20903	8.69466	8.832
CD33	6.70658	6.89148	6.62416	6.72721	7.0108	6.99438	7.38792	6.29276	6.14019	6.37675	6.18303	6.65113	6.84702	6.80948	6.75047	7.3875	6.52878	6.84958	5.9741	6.35451	6.95145	6.42899	7.74293	7.32002	6.16187	6.76803	6.74448	6.68094	7.85017	6.56623	7.21125	7.30166	6.81395	7.2859
CD86	5.58328	5.41411	5.3121	5.28105	5.4809	5.08063	5.04627	5.13545	5.54947	5.3675	5.1665	5.10853	5.45354	5.52125	5.61316	5.47254	5.45308	5.36891	5.17669	5.44461	5.58834	4.96153	5.75452	5.82427	5.28305	5.94893	5.54674	5.17963	6.17945	5.59754	5.99074	5.72796	5.49168	6.06424
CD93	6.79792	7.20672	7.06445	7.49332	7.69762	7.41773	7.33563	6.29616	7.34971	8.36354	7.3506	7.9016	7.1387	7.79509	7.94555	8.20605	7.4128	7.50248	7.83202	7.67945	8.43374	8.76109	7.27627	8.31662	7.7524	8.71367	7.92494	7.78061	8.30913	8.60316	8.31245	9.10216	8.15484	9.07655
CDH5	3.8505	4.72974	4.684	5.15302	5.23096	5.14292	4.96681	4.31884	5.13651	5.81242	4.88841	5.61127	4.28586	6.20997	5.29777	4.99732	4.85217	4.82827	5.4401	5.81527	6.0495	6.09345	5.16984	6.63964	5.04394	6.23558	7.05769	5.19092	5.31653	5.49017	5.21858	5.00913	4.85964	6.30156
CH25H	5.10218	4.9577	5.92227	4.94647	4.90195	4.92635	5.10695	4.64041	5.42425	4.90384	5.2873	4.97019	5.35627	4.90457	6.00758	5.27588	7.37181	5.50097	8.03605	7.78652	4.94845	4.98619	6.01524	5.02364	5.60097	4.97565	6.36008	6.72113	5.48001	6.15291	5.47578	6.12437	5.36505	5.52951
CILP	6.45887	6.76815	6.53812	6.74454	6.95229	6.84164	6.83934	7.75414	6.65511	6.38653	6.92887	7.04318	7.1737	6.67799	6.95657	7.39119	6.71002	8.0536	6.16014	6.71336	6.72191	7.50708	7.64878	6.59788	6.64477	6.52024	7.08169	6.75054	7.27823	6.44998	6.95809	8.25441	7.00414	8.02009
CLEC7A	5.53297	4.35058	4.92934	5.35118	5.18527	5.11801	4.76975	4.7966	5.11669	5.41659	4.96445	4.89845	5.45267	5.97788	5.74182	5.85487	5.43627	5.23007	5.34308	5.52565	6.17518	4.82715	5.83641	6.785	5.50307	6.76334	5.62848	5.23802	6.67181	6.44593	6.98345	6.11537	6.61315	5.57115
COL10A1	4.88327	5.15418	5.05317	7.97372	5.33109	4.92997	5.15944	5.76852	5.04698	9.97886	7.81808	6.48745	9.55346	5.8981	5.65739	5.81432	5.23307	5.5193	5.11386	7.76451	6.0395	10.065	6.81893	5.27259	6.58023	7.43126	5.55761	8.73759	5.81842	6.55802	6.8069	7.38259	8.52311	5.89989
COL14A1	4.94242	5.40232	7.20137	4.67404	4.85918	4.83856	4.81283	4.88809	5.06285	5.27261	5.82189	4.77317	5.41662	5.19692	5.23372	5.41642	6.67918	5.8198	6.26884	6.09288	5.70992	5.65708	6.05305	5.03786	5.15407	4.89203	5.56789	6.36475	5.30987	4.93912	5.35341	7.13746	5.76443	5.69452
COL15A1	4.33954	5.40529	7.02173	7.95627	5.88515	7.42461	7.13336	6.56692	8.1467	7.81707	7.95173	7.77517	6.26109	8.91212	8.05737	7.80795	6.89991	8.31386	8.54318	8.82943	8.07279	8.82268	8.74363	8.33738	7.16063	9.29314	9.74122	7.77218	6.79631	8.02505	9.49657	10.2088	7.26541	9.94615
COL1A2	10.1771	12.7897	11.089	12.6749	13.0966	13.2885	12.315	11.6762	13.7154	13.1104	12.8588	12.7179	13.1997	13.3554	13.3216	12.33	13.358	12.946	12.915	13.0371	13.0652	13.2769	13.0652	12.7315	13.1565	13.2963	12.8217	12.9936	12.5448	13.2009	12.4005	12.59	12.9775	13.3444
COL3A1	9.63101	9.10232	10.3706	10.429	8.88337	10.7372	9.60663	11.5572	12.5389	11.9358	11.8763	11.7918	11.996	12.1031	12.3008	10.6868	12.7209	11.9788	12.3567	12.2079	11.9806	12.1619	9.63876	11.1435	12.2525	11.2355	12.189	12.1714	10.4499	12.5472	11.1777	10.6798	11.5577	12.4884
COL5A3	6.55595	7.32036	7.43579	7.56708	8.19233	6.8372	6.81366	7.49447	7.27912	7.18833	7.70767	8.53148	7.83826	7.47121	7.67615	8.22473	7.55135	7.13944	7.47725	7.17329	6.88697	7.70563	7.30091	8.34369	7.83621	7.53196	7.84355	8.4923	7.88433	7.59242	8.31571	6.89419	7.65178	8.21984
COL6A3	8.98488	9.5	9.4415	10.1401	9.98135	10.9703	9.37395	10.8709	11.6411	11.0719	11.1628	10.2291	11.2988	10.9593	11.3699	11.1303	11.4847	11.6237	12.008	11.8236	10.5571	11.607	11.1694	11.098	11.4674	11.7091	11.5851	11.3523	10.5401	11.8465	10.3928	11.8087	11.5124	12.3296
COL8A2	5.75384	6.97368	5.53355	6.26045	5.55734	5.75066	5.66469	5.67131	7.38966	5.74594	9.03241	7.34387	6.99413	6.19208	7.27908	5.84124	8.74399	7.98967	6.92589	7.87105	6.96422	6.98328	5.99987	5.5633	7.98274	5.74553	6.10805	8.31736	6.20004	8.00739	7.57225	8.46736	7.08975	7.17538
COMP	4.83639	5.02668	4.90445	4.91627	5.07087	4.96243	4.829	6.28178	7.57519	4.74528	9.28124	4.92067	8.14011	6.8582	7.84592	5.27301	5.92531	9.28389	5.68371	7.07597	7.72528	9.88113	5.20825	4.62439	10.5751	4.57533	5.90842	8.95928	5.69992	4.92941	5.14276	12.3555	9.65808	7.85536
COX7A1	6.29683	5.74455	5.46382	7.54134	5.4627	7.60823	6.1316	9.68991	6.09884	8.49673	7.61796	8.82632	9.63647	6.59376	8.41162	8.0957	6.30973	9.03161	7.0223	7.58426	6.2676	8.69034	5.86781	8.10804	6.75035	6.44054	7.69878	9.54927	8.5063	7.29428	7.76059	9.26414	9.50494	7.51409
CSF1R	8.95358	7.43678	7.75367	8.73893	8.08517	9.5984	9.12881	7.22298	7.58631	8.2532	7.95821	8.89803	7.8439	9.27312	9.06333	8.26195	8.57242	8.15624	8.58714	7.54412	11.1293	7.93231	7.6574	10.2585	8.30217	10.2458	7.95515	7.67789	8.63164	8.78448	8.71423	10.6851	8.24649	9.22212
CXCL12	8.29231	5.93275	5.91451	6.04633	6.11936	6.02794	5.83475	7.05031	6.21864	5.99726	6.84857	7.47461	6.25456	6.13184	6.11266	6.10105	8.4766	6.67421	6.72873	6.48692	6.27267	6.46243	6.44676	6.51659	6.57787	6.38	7.32872	7.08541	7.16221	6.91594	7.49623	9.3853	6.50678	8.1919
CXCL14	4.36774	5.85991	4.56554	5.36843	5.22788	7.72682	5.8596	6.71588	8.39687	5.01635	8.27605	4.68186	8.89638	7.0843	8.56885	4.68382	5.18524	8.75745	5.02422	8.50496	8.2658	9.03306	8.6824	5.14358	10.8026	6.36077	5.16698	10.7328	7.69497	8.56054	5.50808	4.5727	12.0661	7.88733
CXCL9	5.83412	6.35501	8.69341	6.2963	6.50079	5.8533	6.28666	5.88293	6.29142	6.33611	5.98239	5.85256	6.74616	5.87518	6.45998	7.26239	6.5185	6.57425	6.03803	5.90684	6.06617	7.79291	7.22706	7.47782	7.03328	7.16162	7.60738	6.59579	7.28371	6.49834	6.95132	6.59808	6.70067	6.80848
DCN	6.52677	8.75879	9.50732	9.20967	8.73845	9.88268	9.09712	8.69721	11.5941	8.66713	9.67302	10.779	10.8501	10.4816	10.1585	7.60599	9.91289	8.42198	8.76922	10.9861	10.1343	9.98591	8.10881	8.89269	10.4196	8.93267	9.22958	9.93336	8.18336	10.1746	10.0195	10.7987	9.49024	10.6236
DDR2	7.3478	6.87111	8.08154	8.66294	8.31095	8.02774	9.01343	7.61253	9.23997	7.86085	7.88519	7.90605	7.4628	7.86457	7.77207	7.2963	8.33098	7.30334	8.90567	8.17703	8.78745	7.73699	7.02151	8.1509	8.5185	7.36463	6.70511	7.85811	7.59437	9.60256	7.40372	7.72648	7.51026	8.10695
DIO2	6.12097	5.68022	5.20919	5.67184	6.05764	6.6502	5.87721	6.1435	5.54904	5.57074	5.30408	5.40685	5.762	5.37185	5.81047	5.92311	5.34936	6.00432	5.17598	5.57117	5.57784	6.27847	6.34234	6.29048	6.55164	5.58784	5.66154	5.82048	5.86586	5.53357	5.73411	5.60573	6.25102	5.72041
ECM2	4.94267	7.04732	5.84801	5.32364	5.05942	5.26769	5.43742	5.46899	6.63698	6.19107	7.42718	6.83521	6.74686	7.25304	8.09405	6.25852	8.42804	7.69215	8.52083	7.17436	6.47215	6.90084	8.38419	5.74542	6.6945	5.25222	7.45507	7.22736	7.29219	5.38555	6.86757	6.73633	7.1548	7.65078
EDIL3	4.30477	4.53407	6.34859	4.63261	4.59341	4.20517	4.67205	4.43627	5.21704	4.47333	4.65472	4.07198	4.82234	4.21477	4.22102	4.84658	5.1967	5.2046	5.43216	4.32668	6.42669	4.40399	4.62874	4.02582	4.57656	6.31072	4.43272	4.51449	5.56889	5.02397	4.25085	9.45951	4.68115	5.9534
EDNRA	8.5225	5.8766	6.08568	5.88843	6.33502	6.36416	6.54128	6.14356	7.77256	7.88679	5.70557	7.15256	6.06034	6.25104	6.69317	6.70236	6.57511	5.87071	8.86705	6.31938	6.08993	7.46867	5.9657	7.36983	7.71061	6.97812	6.47541	6.80743	6.35205	7.08839	6.47229	5.70614	6.50857	7.96441
EGFL6	5.93783	6.05955	5.42187	5.53845	5.65294	7.23273	8.82712	5.64511	6.43971	7.42586	11.1866	6.79551	8.61498	6.93858	10.0735	7.4292	11.0233	9.67015	6.23416	11.0848	6.3584	6.69612	9.20796	9.48677	6.90153	7.5073	6.21792	10.7181	7.59948	7.77657	10.7695	6.0807	8.10286	8.25675
EMCN	4.96655	5.24755	4.96953	5.43	5.39331	5.10808	5.31965	5.12157	6.02423	5.40575	5.22666	5.45552	5.47478	5.71693	5.36514	5.0903	5.24001	5.6363	5.32857	5.98217	6.55217	5.77165	5.22495	6.5029	5.3109	6.68053	5.44315	5.47439	5.65529	5.28796	5.39451	5.56725	5.54181	8.28315
ENPEP	3.7623	3.94068	3.80652	3.98674	3.8691	3.95831	3.79715	3.67032	3.99818	5.92517	4.29143	7.54334	3.87844	4.55932	4.21871	4.32979	3.93143	4.76557	4.35873	6.40192	4.39899	4.32464	4.59623	5.0696	4.10979	4.23652	4.67721	5.14533	3.92924	4.42329	4.13344	3.76974	3.89072	5.35257
ENPP2	6.37912	6.69844	7.5285	10.6646	8.98891	9.18616	7.63513	4.69103	8.40297	7.69046	9.37669	10.3202	6.83519	10.0139	8.30167	7.55645	7.1653	6.8473	5.51728	10.4798	10.5256	9.86808	7.94972	9.95989	9.05928	10.0642	7.84904	9.56375	7.42915	7.23149	6.72932	10.6505	7.31055	7.76196
ERG	4.84865	5.08111	4.95961	4.99913	5.17298	5.00329	5.0756	4.91391	4.98446	5.30822	5.55983	5.65724	5.31633	5.37361	5.28367	5.60752	5.0236	4.98908	5.3134	5.15747	5.61458	5.66776	5.6304	5.46215	5.30101	5.15695	5.83079	5.77125	5.76705	5.21797	5.50173	5.25222	5.83102	5.67464
F13A1	6.61188	6.76452	7.70016	6.58467	7.0427	6.88019	6.69168	6.12254	7.58915	7.76698	8.41872	7.05192	7.46941	7.5018	7.36141	7.92693	7.74578	7.55952	7.14376	7.41229	9.48655	8.20796	9.27021	8.06317	7.88691	9.30319	9.04141	9.32756	8.3332	9.68563	9.42037	10.0267	8.93034	8.39224
FAP	5.62017	6.02476	6.24383	6.37692	5.91241	6.76595	7.31497	7.17407	7.38418	6.75102	7.5799	6.40156	6.1965	7.30422	7.4067	6.49758	9.66229	7.82563	9.26507	7.49956	8.12331	6.73219	6.32992	6.58313	7.72007	7.00058	7.14858	6.42699	7.01573	9.74205	6.973	10.1997	6.54155	8.9319
FASLG	4.85035	5.40604	4.69847	4.8678	4.84782	5.00305	5.05497	4.77736	4.67943	4.84638	4.81778	4.86419	5.06634	4.68948	4.78867	5.47964	4.84022	5.13566	4.53766	4.59455	4.94294	4.86841	5.6827	4.74776	4.83031	4.7824	5.44399	4.8275	5.45366	4.78158	5.186	5.16729	5.06743	5.27686
FBLN2	7.56193	5.25004	5.54569	5.12885	5.17496	6.76685	6.26787	5.34516	5.20139	5.07955	6.99275	8.74165	5.46036	5.44113	4.77645	6.11574	5.29459	5.70798	5.69035	5.67386	6.3064	8.84661	5.72007	5.95257	6.58388	5.32784	8.44032	6.59923	6.35831	5.99354	5.89395	5.25975	7.00689	6.80699
FCGR2A	5.92298	5.86987	5.29767	5.27635	5.79235	4.99976	5.28135	4.86267	5.43256	6.12835	6.03566	5.89523	5.28239	5.78465	6.90453	5.7497	6.10202	5.23359	6.26304	5.82592	7.16944	5.75992	5.59229	6.94886	5.91536	6.32081	5.8836	5.87181	6.36528	7.41104	6.74815	8.22554	6.74205	6.03784
FCGR2B	5.83067	5.16573	5.08419	4.80163	4.68992	4.48561	5.11256	4.62895	4.81208	4.87472	4.93276	4.58333	5.33258	5.09777	5.46431	5.4978	5.21796	5.4066	5.57902	5.3163	6.0582	5.00155	6.6262	5.36136	5.33263	5.08365	5.75844	5.02886	6.61776	5.83487	5.68299	7.07221	6.4956	5.23557
FMO1	5.3153	5.49418	4.82005	5.55328	5.57086	5.00413	5.17444	6.27263	5.39223	6.09646	5.31919	5.28376	5.58316	5.39646	5.85048	5.62325	5.70286	5.30318	5.18257	5.40849	5.257	5.51658	5.68637	5.59015	5.55708	5.34717	5.34684	5.77593	5.96256	6.57724	6.69114	5.29619	5.84175	6.41447
FOXF1	7.68961	5.62171	4.677	4.84227	4.92391	4.61878	4.85716	8.93758	4.65224	4.85141	4.87273	5.0438	5.2975	4.87925	4.84812	5.36508	5.06522	5.18683	8.04714	4.96704	5.64314	4.92564	5.1624	4.94592	5.28629	5.09772	4.92848	5.80818	5.03544	4.95706	5.30602	5.07787	5.75515	5.48457
FPR1	4.55565	4.85438	4.95444	4.58848	4.81486	4.66141	5.27243	4.7429	4.5509	5.14877	4.87327	4.82025	5.00004	4.81509	4.91767	5.50951	4.80893	5.10541	4.87282	4.78847	5.42183	4.95361	5.28138	4.87108	4.81368	5.79732	5.00899	4.67603	5.90461	5.14063	5.50354	5.72531	5.45785	5.64991
FRZB	4.66941	7.12159	5.77426	5.3263	6.96721	4.52786	5.49778	4.65075	4.33348	4.68154	4.62744	4.56875	4.94061	5.50706	4.39159	4.89272	4.62587	4.66102	4.2795	4.8985	4.59024	5.11892	5.3383	4.68751	4.85267	4.64853	6.33585	6.14649	4.94851	4.74552	4.91238	4.4628	5.48068	4.92233
GPR124	6.01378	7.49175	6.64	6.42081	7.17138	6.1739	6.40088	6.5122	7.65364	6.82398	6.73065	7.37909	7.54887	7.21284	6.98282	7.09418	7.29816	6.96167	7.2387	7.02343	6.22619	6.99714	7.54195	7.38177	7.51495	6.77513	7.20875	7.71482	7.28725	7.84283	6.83086	6.67148	6.9791	6.57503
GREM1	4.43832	4.38784	4.01711	4.7772	4.02738	5.41543	4.75341	7.14895	4.11125	4.07887	5.11786	4.28398	4.31182	4.32298	6.32425	4.7736	7.58411	4.18438	6.33255	4.12459	4.50274	5.1267	5.03497	6.8124	7.11722	5.59833	5.64766	5.85596	4.84471	9.7039	6.81618	4.54003	5.44139	4.62746
HDC	5.08648	5.62321	5.23841	5.20007	5.20805	5.10135	5.47867	5.29532	5.1594	4.93654	4.97917	5.11859	5.8467	4.96865	5.18772	5.68407	5.09356	5.34465	5.16833	5.14709	5.04386	5.30548	5.51328	5.27206	5.1658	5.04818	5.34004	5.39614	5.8659	5.20258	6.08112	5.24808	5.78175	5.39959
HEPH	4.19444	4.27465	3.94964	4.15154	4.02128	4.53368	4.03932	4.00357	3.98723	4.43911	4.32276	4.00915	4.26809	4.46206	4.37548	4.48728	4.01073	4.3724	5.51861	5.4566	4.11817	4.448	4.68988	4.23451	4.19761	4.10132	5.13958	4.27881	5.208	4.10063	5.09197	5.1849	5.56015	4.40306
HGF	4.50845	4.66048	4.30544	4.24707	4.41624	4.36593	4.41923	4.28032	4.20332	4.33162	4.38573	4.37942	4.62652	4.38001	4.58881	4.84713	4.80079	4.70646	6.96334	4.39508	4.70534	4.31886	4.98733	4.8441	4.23975	4.4021	4.85481	4.32479	5.22873	4.8569	5.3343	4.43494	5.11762	4.54514
IGF1	6.10495	5.77765	5.58434	5.69166	5.71564	6.04304	5.49966	5.60916	6.30617	6.18417	6.689	7.41476	5.93695	5.77119	6.50552	5.96306	5.7681	7.38945	5.66774	5.87224	6.51026	7.16276	6.28517	6.74103	6.74153	5.98384	6.61471	6.25972	5.93733	5.46399	6.1599	6.32971	6.91399	7.52346
IGSF6	4.504	4.8578	4.91967	4.51133	4.92057	4.49774	4.21649	4.55449	4.60885	4.77426	4.5301	4.66664	4.67166	4.67241	4.94087	4.80506	4.79179	4.61914	4.57649	4.4893	4.76387	4.66072	4.72985	5.24648	4.97863	6.72122	4.67686	4.48713	5.54689	5.29023	4.78845	4.8617	4.54751	4.79179
IL18R1	3.74397	4.03868	3.68303	3.81193	3.91425	3.83445	3.85746	3.59197	3.79065	3.66159	3.8224	4.38842	4.29788	3.99184	4.13182	4.02839	3.86753	3.88655	3.81284	4.03851	3.72501	3.75338	4.23801	3.70386	4.01376	3.87379	3.97736	4.88659	4.16566	4.10652	4.60016	3.76167	4.24863	3.9812
IL1B	6.2536	6.54036	6.29741	6.20257	6.39941	6.21018	6.24418	6.27045	6.09947	6.05897	5.93236	5.97724	6.58755	6.17872	6.44103	6.68311	6.44087	6.37674	6.31455	6.03367	6.29016	5.93783	6.89952	6.15609	6.32651	6.35826	6.47661	6.24604	6.82539	6.30724	6.68594	6.63711	6.5818	6.64865
ISLR	5.16903	5.89513	5.45717	4.8585	5.10143	5.09211	5.74682	6.39923	5.21674	5.60954	6.67769	5.42616	5.79627	5.07066	5.83929	6.19529	8.85438	6.49523	9.53353	6.37734	5.19652	8.59002	6.36643	4.8134	9.50203	5.56986	6.18827	6.63569	6.34661	5.67906	7.50816	9.62936	7.81651	6.87041
ITGAM	5.39674	5.36387	4.8995	5.50744	5.4446	4.97839	5.25613	5.13582	5.02615	5.26639	5.43326	5.31616	5.33952	5.69027	6.30664	5.89604	5.67383	5.57776	5.49178	5.77814	6.97204	5.08645	6.46822	6.23169	5.24022	7.04827	6.66009	5.41385	5.71564	7.26261	6.57993	6.6321	5.68819	5.94793
ITGBL1	6.42159	4.75607	4.91367	4.73997	4.7176	4.7473	4.65736	5.92941	5.25774	5.86219	5.23545	6.44199	5.04893	6.52834	5.0946	5.02278	5.41496	6.2707	5.51611	5.43928	4.91614	5.44076	4.91137	4.65152	6.68994	4.99612	4.77409	5.15555	5.20139	5.2071	5.33631	8.59694	6.9157	6.34174
ITIH3	4.57158	4.7779	4.33469	4.59489	4.64102	4.68477	4.63846	4.72269	4.51086	4.40974	4.49861	4.51009	4.80956	4.54775	4.29507	4.88976	4.44197	4.42709	4.44848	4.6657	4.58332	4.46127	4.97662	4.36738	4.51495	4.57668	4.84127	4.31671	4.90919	4.56635	4.90514	4.86782	5.06113	4.93027
ITIH5	4.9015	5.45695	5.46107	5.07185	5.32072	5.34916	5.9066	6.72069	5.13668	5.40705	5.75701	5.75591	5.2532	5.15159	5.26089	6.22725	5.16588	6.75255	4.95894	5.22432	5.35698	6.38056	6.11076	4.85452	5.33897	5.25443	5.23257	5.53021	6.21954	5.10041	5.70498	5.48623	6.00018	6.17483
ITM2A	5.43097	5.69634	5.65292	6.72708	5.4417	5.4483	6.01149	5.61273	6.25553	6.68472	6.32379	5.87517	6.17911	7.01493	6.12931	7.20533	6.02192	8.27685	5.48201	6.93699	5.97223	7.54117	7.01402	6.4117	6.29402	7.31995	7.23485	9.08305	6.23064	5.46874	6.9477	7.08525	6.98862	7.34198
KCNJ8	6.08474	7.36308	7.1998	6.24433	6.52681	6.08758	6.44069	6.1713	6.75398	7.13087	6.97781	7.65121	6.87404	6.7198	7.01378	7.19432	6.4623	6.74458	6.45767	7.34306	6.83459	7.65157	7.142	7.53514	6.66486	6.76155	8.09866	7.13969	6.98506	7.23105	7.30742	6.41223	7.13642	7.28006
KDR	5.07919	5.57834	5.21386	5.60994	5.68577	5.79982	5.53035	5.11136	5.75521	6.04457	5.35042	5.95618	5.29577	6.70686	5.72735	5.33217	5.47408	5.3396	6.28714	6.80623	6.57995	6.57489	5.33487	6.44791	5.62262	6.5466	6.26449	6.12114	5.68925	5.84314	5.53046	5.34432	5.71648	6.68576
LDB2	6.86895	5.08097	4.6568	5.18525	5.47397	5.65171	5.43911	4.82741	5.15917	6.72455	5.66283	5.90105	5.23308	6.7228	5.51167	5.79836	6.42358	5.28049	7.62711	6.33979	6.48902	6.92396	6.39194	6.6284	6.08291	6.45509	7.08858	6.94451	6.17836	5.72837	5.96243	5.18086	6.12314	6.69017
LMOD1	5.09317	5.54226	4.91159	5.06925	5.30683	4.8903	5.36861	5.03831	4.98253	5.02547	5.45044	5.55853	5.64145	4.89168	4.92259	5.60137	5.23011	5.42639	4.77907	5.39988	5.18956	5.25658	5.29729	4.95726	5.17114	5.16436	5.48958	5.32152	5.40774	5.22494	5.78083	5.65819	6.19166	5.39328
LPPR4	4.65695	5.07303	4.68116	4.5969	4.32498	4.68424	6.17754	4.45624	6.44252	4.50556	4.86921	7.14966	4.76461	4.71785	4.70025	5.11035	4.18552	4.85162	4.75697	7.64834	4.75783	6.12004	5.47514	4.94303	4.81271	4.93507	5.17838	6.14275	5.75861	6.56093	4.75319	4.52896	5.05542	5.08953
LRRC15	6.13828	9.00605	6.71128	9.3635	8.1292	11.1398	9.73864	6.8519	10.4568	7.88166	8.92752	8.92211	10.6481	10.2835	10.2172	7.89502	11.3116	10.448	10.1352	9.33858	8.98752	10.9861	8.79912	9.99941	9.70731	10.0242	9.89653	9.35984	9.47496	10.8472	8.80795	9.36714	10.4272	9.69573
LRRC32	6.64804	6.67651	6.62076	6.88668	6.92737	6.59063	6.72543	6.62752	6.68819	7.50719	6.49951	6.61421	6.98907	6.86229	6.52315	7.27035	6.56227	6.98263	6.59794	7.50804	6.22807	6.84105	6.91026	6.71319	6.73903	7.10292	6.58991	6.77872	7.81314	7.83565	7.1687	6.60947	7.26781	7.54939
LUM	7.923	10.9405	10.5387	10.7753	8.71326	11.1015	11.2169	9.34545	11.9764	10.6195	11.0079	10.9886	12.635	11.4291	11.73	10.1372	11.1018	10.6298	10.7236	11.3056	11.1979	11.7733	12.1702	10.9927	11.6183	10.346	11.3452	11.6201	10.6274	11.072	11.4525	11.5927	12.1565	10.6331
LY86	7.05452	6.66351	6.90976	7.15975	6.91312	6.49988	6.72615	6.26041	6.78926	6.77397	6.74661	6.93576	6.82955	7.10552	6.96868	7.37282	7.34223	6.97644	6.54852	7.16253	7.55176	6.97774	8.13428	7.69282	7.1095	7.80549	7.93419	7.10323	8.22022	7.28645	7.72345	7.57985	7.40736	7.96828
MAF	6.19048	5.57922	5.49489	5.57436	5.81626	5.45614	5.08212	6.38849	6.35574	6.17722	6.67167	6.20807	6.32914	6.32291	6.52195	6.40023	6.47347	6.48174	6.91743	5.93049	6.7731	5.83394	6.63003	7.03233	6.92946	6.86759	6.36426	7.32705	6.29214	7.65643	6.93307	6.35858	7.17568	6.54859
MFAP5	4.10121	4.3728	3.97611	4.4497	4.08542	3.97354	4.12352	4.44476	4.1878	4.97994	4.55764	3.97088	4.4129	4.28832	4.31498	4.2499	4.16137	4.95128	4.00134	5.7444	4.92987	5.52241	4.78613	4.0971	6.6878	3.88789	4.89609	4.06783	4.78052	8.20891	4.86163	5.42806	4.79189	5.14546
MMP3	4.15062	4.25897	3.98293	4.19687	4.28765	4.13303	4.11618	3.90713	3.84149	4.06271	4.15826	4.11881	5.30089	4.01719	4.23049	4.48992	4.05855	4.23221	3.96903	4.09062	3.94216	4.19685	4.39497	4.08795	4.01591	3.63859	4.72358	4.18934	4.3477	3.97869	4.21884	4.07253	4.25813	4.27023
MS4A4A	5.11275	4.19205	4.62899	4.70557	4.89603	3.90331	4.21824	4.20229	4.47607	5.68666	5.0815	6.41886	4.12355	6.24194	6.4234	4.60353	5.37451	4.50487	5.47981	6.07131	6.76691	4.57322	5.18723	8.25988	5.08344	7.75204	6.09265	4.77092	5.65324	7.11993	6.65924	6.83422	5.20412	6.47908
MS4A6A	8.08862	6.83758	7.14615	6.70201	7.01239	6.26596	6.58539	6.76907	6.96342	6.83623	7.01776	7.17385	6.89251	7.71481	8.05243	7.63518	7.69231	6.47393	6.70071	7.47864	8.74215	7.17963	7.62623	8.75205	7.52239	8.97497	8.40883	7.42499	8.50579	7.96828	9.18648	8.10662	8.69348	8.08416
MSR1	4.53381	4.63952	4.56346	4.51895	4.8269	4.40861	4.67239	4.51462	4.5522	4.64649	4.57595	4.52265	4.77648	4.67289	5.01023	5.20761	5.204	4.70427	4.50728	4.5593	5.45613	4.52225	5.02996	4.80376	4.6668	5.64869	4.57379	4.50863	5.4611	5.13703	5.01246	5.69457	5.19049	5.49741
MXRA5	9.76432	10.0688	7.28463	9.15608	8.96947	9.23806	9.09522	10.3305	10.3287	7.99306	10.9283	7.8836	10.5651	9.97087	10.4319	9.55108	11.3962	10.9831	10.2784	9.46779	10.721	9.46169	10.7143	9.39507	10.0663	8.82745	10.5771	11.3914	10.0018	11.0706	9.87097	10.694	10.1256	10.7476
NOX4	5.16399	4.62569	4.50309	4.42054	4.55883	4.51754	4.55923	4.70491	4.14271	4.92744	4.58112	4.48932	4.98806	4.54865	4.87086	5.17886	4.45259	5.45023	5.87727	4.76547	4.62182	4.88944	5.18874	4.54582	4.67787	4.66786	5.05307	4.96585	5.40753	7.50576	5.70068	4.83272	6.21533	5.1333
OLFML1	5.15208	6.60506	5.68712	5.35411	5.62341	6.16163	7.29219	5.73565	5.69557	6.14679	6.2673	5.49281	6.00511	6.09758	6.64417	5.83901	5.47886	5.88604	4.93089	7.28093	5.85433	7.11824	6.77146	5.60715	7.45325	5.72004	7.92701	6.53577	6.08225	5.52903	6.36717	6.07416	6.82817	6.85086
OLFML2B	7.80073	7.91948	7.42442	8.474	9.10957	10.3095	9.81434	9.9648	10.3832	8.37693	9.20682	9.40355	8.06604	9.91399	9.96376	7.72395	11.5	8.31293	10.961	10.4609	9.95969	8.76712	8.09913	10.436	9.85306	9.49655	8.83908	9.25323	8.24987	10.7591	8.66386	8.95175	8.92789	9.84928
PAPPA	4.9764	5.32759	5.0732	4.84091	5.09291	5.06009	5.21556	4.96753	4.90288	5.04212	4.98787	4.91267	5.30358	4.82418	4.86272	5.35988	4.9722	5.28412	4.89182	4.84855	5.02791	4.9949	5.65092	4.92346	4.86503	5.05742	5.04276	4.94651	5.66474	4.79633	5.06739	5.26737	5.42455	5.30957
PCDH12	6.22251	6.69883	6.67332	7.16479	7.18168	6.88907	7.05283	6.95611	6.99743	7.11865	6.71482	7.09215	7.42883	7.24171	7.22055	7.59617	6.86317	7.29451	7.1756	6.94456	7.29671	7.29484	7.30973	7.51274	7.21369	7.13255	7.23501	7.6764	7.71492	7.07518	7.92932	6.94987	8.02928	7.63132
PDE2A	6.42504	6.17856	5.92431	6.2248	6.51667	6.48542	6.42745	6.67855	6.16646	6.58771	6.40303	6.34904	6.80876	6.52371	6.56417	7.24796	6.12666	6.84705	6.2109	6.06559	6.40373	6.99895	7.46982	6.75128	6.52714	6.57246	6.71023	6.81819	7.08664	6.53739	7.31606	6.62849	6.8234	7.11853
PDGFRB	6.07083	6.76678	6.45716	7.31501	7.01111	7.43098	6.75051	6.92201	7.05769	7.87671	7.98624	7.14728	7.50928	7.4791	6.95689	7.80631	7.09046	7.56494	8.41498	6.81838	7.95342	8.01919	7.42673	7.88278	8.17637	7.4025	7.7578	7.53898	8.15164	8.5741	7.53812	6.7607	7.55108	8.19404
PIK3R5	6.38676	6.38355	6.68692	6.46929	6.74704	6.55205	6.80771	6.75031	6.61315	6.6201	6.89739	6.43861	6.74343	6.28907	6.35677	6.76355	6.4833	7.01949	6.32175	6.50146	6.69132	6.40204	6.90517	6.83838	6.60016	6.58531	6.6903	6.53699	7.10134	6.5075	6.85037	6.85304	6.70493	7.21533
PLXDC1	5.6348	6.53669	5.83923	6.60652	5.85809	6.27398	6.16532	6.45509	5.754	6.84588	5.74741	6.38134	6.95244	6.69795	7.29429	7.70458	7.64991	6.71629	6.22936	7.3018	6.48974	7.83204	7.32377	7.43109	7.68185	7.07547	7.77837	6.899	7.24852	8.13194	7.56511	5.92814	7.67347	7.06146
PLXNC1	4.64963	4.64369	4.69665	4.16131	4.56263	4.31121	4.5155	5.04356	4.66309	4.48927	4.28513	4.71788	4.44785	4.65294	4.95301	4.91455	5.44345	4.9537	5.30399	4.914	5.10691	4.47019	5.31286	4.71677	5.18133	5.35295	5.16861	4.6514	5.21926	6.17374	5.26835	4.62713	4.76744	5.13711
PRKG1	4.55445	4.75785	4.64969	5.02348	4.76265	4.61776	4.69421	4.71726	4.63906	4.7336	4.42664	4.54265	5.03964	4.56015	4.66057	4.91414	4.7123	4.88644	4.36153	4.5577	4.44085	4.4074	5.15285	4.54195	4.68568	4.59304	4.63873	4.6923	5.11403	4.72963	4.89495	4.88434	4.77667	5.03191
PTGER3	4.0508	4.46591	4.15685	4.1111	4.219	4.23488	4.27448	4.11266	4.02465	4.1115	4.10936	4.11661	4.27086	4.11767	4.12921	4.48031	4.11758	4.38838	3.98514	4.09283	4.14321	4.1932	4.79911	4.08313	4.1902	4.11172	4.31018	4.20082	4.51055	4.10591	4.30107	4.33133	4.35493	4.40469
PTGIS	5.11758	5.67063	5.22251	5.35485	5.46109	5.62073	5.59758	6.7299	5.43283	5.30117	5.75499	5.81398	5.84634	5.46344	5.79711	6.07279	5.15692	5.37848	5.08809	5.57917	5.53574	6.1171	5.80359	5.53072	5.881	5.30493	5.74928	6.05631	6.14043	5.26544	5.89713	7.20739	6.03405	6.07242
RAMP3	6.54928	6.27115	6.15293	6.47379	6.6938	6.86345	6.82828	6.40558	6.54049	6.63333	6.64449	6.72877	6.37513	6.72408	6.31998	6.38818	6.54306	6.63548	6.2757	6.99398	6.97852	6.97725	6.37803	6.35966	6.52342	6.87309	7.02919	6.64735	7.32478	6.4274	7.1371	6.89247	7.19071	7.69155
RARRES2	9.72108	5.64417	7.13842	5.68705	5.64195	5.54961	5.33064	7.24208	5.32007	5.97513	5.9861	5.05343	6.43002	5.33059	5.33934	5.77762	5.5658	6.46481	5.25856	5.43513	5.37617	6.05023	6.18409	5.48703	7.9348	5.08273	5.8641	7.66261	6.46673	10.087	7.14748	5.89796	8.94314	6.6618
RASGRP3	5.30846	4.85219	5.1513	4.87511	5.16319	5.07484	4.93812	4.75012	4.7059	4.84591	4.65928	5.20702	5.14798	5.36855	5.1139	5.80849	4.63542	4.74286	5.25755	5.17001	5.23895	5.41415	5.25765	5.99878	5.08733	5.70889	5.7316	5.21601	5.22139	5.14058	5.33869	5.5554	5.40765	5.44771
RGS4	5.36005	5.91309	5.22213	5.5428	5.55073	5.29035	5.52632	6.33215	5.28132	5.40553	5.2965	5.30615	6.03272	5.55516	5.54666	5.79826	5.58172	5.48602	5.41888	5.54919	5.38858	5.63476	6.19445	6.3683	5.69451	5.42623	6.11593	5.90191	5.94033	7.40989	5.93562	5.61255	6.10416	5.99025
RSAD2	4.31027	4.15009	4.71085	4.36815	4.70373	4.24069	4.40422	4.30599	4.78023	4.5651	4.59859	6.46768	5.1472	4.7043	4.97285	4.76396	5.18651	4.42965	4.31421	4.50535	4.65372	4.58368	5.03182	5.89925	4.7408	7.46283	4.7127	4.60703	5.83563	4.23232	5.03787	4.79435	5.02415	5.64919
RUNX1T1	5.1661	5.19029	5.30606	4.70479	4.79642	4.86834	4.92431	6.56434	5.73607	4.66544	5.62801	5.14348	5.2889	5.06641	4.99847	5.22478	5.48031	5.87458	5.4387	5.06765	4.78982	5.432	5.15602	5.09666	5.60096	5.01992	5.03628	5.58702	5.44267	5.31091	5.1763	4.69845	5.17053	5.60317
SAMSN1	4.6206	3.96805	4.32618	3.85547	3.8752	3.36819	3.66461	3.87072	4.09402	4.76799	3.99839	4.09098	3.71647	4.45447	5.91425	4.02644	4.75152	3.88567	4.59117	4.65941	5.41663	3.93662	4.0562	5.46938	4.76099	6.27241	4.5966	4.08522	4.52841	6.31883	5.70943	4.46313	4.13458	4.33385
SCUBE2	5.50539	5.54853	5.60891	5.1009	5.68306	5.32617	5.65236	5.50757	5.16713	5.27422	5.77682	5.34251	5.92935	5.68286	5.24934	5.87886	5.52801	5.72093	4.96385	5.52207	5.97664	5.83955	6.15603	5.3177	6.07338	5.47895	5.65473	6.04153	5.91643	5.80854	5.48234	5.90398	5.75902	6.20642
SERPING1	5.65966	6.3263	6.43376	6.99697	6.79613	8.49925	6.25758	6.36937	6.24595	7.00269	6.66334	7.20867	6.32497	6.19024	6.40993	7.03445	5.76196	6.27927	6.047	5.92718	6.80721	7.6313	5.34786	7.3572	7.91565	7.45285	7.34904	7.20527	7.29978	7.13731	7.56936	8.60217	7.75503	8.54183
SFRP4	6.49245	5.28406	5.19928	5.34892	5.47726	5.42722	5.25454	6.70206	7.39239	5.48404	6.86302	5.06458	5.70202	7.97294	6.2035	8.69335	10.8438	8.81597	10.3139	6.86154	6.38698	6.44393	6.08367	7.56831	6.35404	7.15836	8.3113	6.13901	8.44303	6.94714	8.22206	11.0661	6.92687	9.95502
SGCD	5.37616	5.77488	5.51199	5.72965	6.23147	5.57346	5.70548	5.92264	6.19485	5.46528	6.01389	6.06097	6.64745	6.19981	5.72095	5.62529	5.5152	6.15559	5.4814	5.81026	5.68352	5.82441	6.06541	5.41335	5.71986	5.72809	5.82668	6.12001	5.79564	5.60027	5.74177	5.65162	6.04266	5.70814
SH2D1A	4.79209	5.28237	4.93435	4.9392	5.03813	4.65825	4.77576	4.9884	4.94735	4.99631	4.82513	4.69787	5.42155	4.76463	4.88692	5.05209	5.03214	5.10865	4.78269	4.62786	4.71295	4.73383	5.00795	5.02933	4.8279	5.03643	4.77374	4.88308	5.08844	4.91314	5.37158	4.7176	5.22688	5.06353
SIGLEC1	5.48211	5.76662	5.71014	5.60315	5.80133	5.62133	5.66882	5.63623	5.52816	5.8046	5.50965	5.99022	5.93712	5.77559	5.94557	6.66373	5.78654	5.72995	5.37992	5.662	6.24238	5.56378	6.10865	6.7262	5.85181	7.20875	6.13038	5.67548	7.54725	5.9334	6.65692	6.3566	6.57834	6.85095
SPON1	4.94402	5.38193	4.91742	4.88187	5.39765	4.95402	5.2715	5.38092	5.66711	5.17228	6.15404	4.99711	6.5378	5.4198	5.79368	5.36867	5.77284	6.51775	4.9229	7.02881	5.2049	6.69657	7.04189	5.14931	6.72924	5.71741	6.2229	6.20072	6.07598	5.09135	6.12354	5.0757	7.63985	7.05263
SULF1	6.95803	5.76366	6.59881	6.31408	6.24513	8.6172	8.37358	8.0279	6.83753	7.21094	6.42908	7.46895	8.36828	8.11182	8.12324	7.20997	8.71452	6.84191	8.68185	8.91781	7.27701	8.28544	7.57945	8.13581	8.2032	9.08049	8.57039	8.33692	7.73877	8.14579	8.35065	11.6538	8.46431	9.45938
TCF21	3.79049	3.679	3.46408	3.6402	3.75244	3.45547	3.55189	3.65582	3.75933	3.65616	3.55344	3.66546	4.11794	3.82433	3.67228	3.72695	3.62597	3.449	3.56921	3.52262	3.64914	3.68137	3.69622	3.55272	3.72541	3.73002	3.60786	3.74179	3.73898	3.70051	3.92171	3.63799	4.36609	3.62173
TFEC	4.17507	3.5836	3.8897	4.23781	4.09872	4.43426	4.09273	3.63571	3.73224	3.98651	3.85534	4.41731	4.12036	5.31033	5.00472	4.16295	4.3105	4.10134	4.18521	4.21599	4.90598	3.93966	4.40081	5.41048	4.02052	5.80677	4.67564	3.88291	4.53835	4.52928	4.76483	4.37844	4.38183	4.90549
THBS2	6.11209	7.49842	8.28543	9.0077	6.0236	8.36502	8.76287	7.94162	8.15598	8.68483	10.1058	9.8752	10.8702	8.62781	9.48489	9.14373	10.3372	11.3554	10.7336	9.60601	8.34071	10.9775	11.0569	6.82011	9.36598	8.7187	10.4266	9.95922	10.2275	10.4478	10.4454	10.7131	11.7704	10.2259
TLR2	6.44296	6.14649	5.87868	5.83134	5.69667	5.54441	5.69425	5.48915	5.73455	5.98757	5.48864	6.0839	6.15746	5.8462	6.2425	6.2321	6.27686	6.28887	6.38343	5.85961	6.58824	5.90707	6.81269	6.42497	6.15638	6.88147	6.43045	5.90599	6.45548	6.86547	6.57171	6.54808	6.87347	6.10602
TLR7	4.00839	3.74813	4.003	3.72344	3.83973	3.76423	3.95389	3.82735	3.84173	3.77297	3.82621	3.85958	3.90698	3.88894	4.27892	3.99157	3.99778	4.03332	3.70044	4.02294	5.01264	4.04515	4.74448	4.99457	3.99509	4.07617	5.01466	3.92056	4.66558	3.7867	4.151	4.16663	5.2804	3.98874
TNFSF4	5.90659	5.86255	5.65421	5.75646	5.70243	5.36743	6.05929	5.57023	5.6442	5.55019	5.65822	5.48277	5.79562	5.53783	5.11669	5.91485	5.64535	6.21548	5.67188	5.84682	5.92732	5.55519	6.27038	5.70377	5.78012	5.77426	5.58432	5.45658	5.74522	6.43453	6.32344	5.82196	6.06621	6.36593
TNN	6.55423	4.54902	4.59696	4.76891	5.29395	4.48673	4.74326	4.75685	5.7333	5.07423	5.28928	5.47014	5.8628	5.9003	5.1139	5.66748	4.82961	10.9198	4.75493	5.06547	5.59616	4.60172	5.46555	5.16828	5.23908	5.91912	4.83122	6.94163	4.96483	4.62573	5.01563	6.18849	6.04019	5.37512
TRAT1	3.77408	3.65252	3.65885	3.72422	3.77678	3.66705	3.62843	3.67702	3.7493	3.60745	3.52673	3.59355	3.75298	3.71552	3.45116	3.68388	3.65936	3.78286	3.4803	3.57661	3.67376	3.62155	4.43128	4	3.6714	3.73805	3.74737	3.78826	4.13071	3.72238	3.93595	3.62158	4.09587	3.81037
VCAM1	10.589	6.41389	6.90898	5.09411	5.18138	6.6364	7.47984	5.27039	6.36486	5.69665	7.50815	6.47988	6.74796	7.3801	6.87661	8.12238	8.69146	6.91646	9.80164	7.30166	8.78912	6.59506	7.95114	8.88652	5.94925	8.26577	8.89646	5.50243	9.58805	7.04406	9.40707	12.1569	9.44755	8.98035
VSIG4	6.86601	6.3418	5.54726	6.47707	6.75399	6.29725	5.88418	6.43493	6.87811	7.09599	6.9142	7.23108	7.09207	7.35964	7.71541	7.6505	7.90424	6.14397	7.02235	7.15435	9.08729	6.67216	7.53202	8.04026	7.202	8.56999	9.36333	7.00139	7.95891	9.05463	8.39607	8.29905	8.41801	7.8652
WISP1	5.54982	5.75732	5.62537	5.85598	9.31687	7.21261	6.35701	5.52307	6.73191	7.27133	5.92349	5.42498	6.46201	5.62316	6.0499	6.00576	8.6834	5.89015	7.87399	6.06675	6.29832	7.81918	6.78513	6.41999	6.33901	6.51354	6.27659	6.42641	6.02593	7.16109	5.96489	5.68107	6.18099	6.82844
WNT2	5.69067	6.63753	6.05571	6.11806	6.18598	5.82716	5.92106	5.89983	5.67882	5.69431	5.60403	5.7645	6.40398	6.03789	5.72921	6.17521	5.73288	6.09909	5.29624	5.60692	5.9329	5.56083	6.82834	5.98796	5.87519	5.6627	6.03855	6.03837	6.48952	7.45165	6.49171	6.11499	6.26544	6.50687
ZEB2	5.75646	6.38654	5.61745	6.21905	6.43853	6.33027	5.72812	7.76416	6.5134	5.90265	6.00524	5.87597	6.28156	6.99765	7.62857	5.8113	5.40469	6.13017	6.81284	7.29017	6.31455	6.47597	5.25577	6.98049	6.51182	6.78715	5.79328	7.44367	5.5405	6.63559	5.8141	5.54479	5.90213	5.13716
ZFPM2	3.79665	5.91535	3.70839	4.37694	3.8921	4.33072	5.37443	7.42664	3.70732	4.28849	6.38353	4.2472	4.49291	5.43449	5.88616	4.17555	6.57208	4.85588	7.36952	6.79988	4.1619	5.25905	6.34946	4.60701	5.59779	4.22659	6.64789	6.58788	4.57729	6.94818	4.04846	7.67071	5.18601	4.7669
ZNF423	4.58203	4.82042	5.73447	4.64978	5.35153	5.03698	4.74576	7.98868	5.01968	5.7082	5.9439	6.94479	5.60442	5.81734	4.9571	5.60138	4.52094	6.34644	8.12547	6.31571	5.99274	7.03841	5.8972	6.06888	6.43886	5.02383	6.96338	8.58634	5.67873	4.97275	5.53493	5.17861	7.9331	5.87928

## Sheet: Fig.1_GSE39055
https://www.ncbi.nlm.nih.gov/geo/query/acc.cgi?acc=GSE39055
Sample	GSM954809	GSM954821	GSM954810	GSM954826	GSM954796	GSM954793	GSM954814	GSM954800	GSM954808	GSM954790	GSM954797	GSM954802	GSM954815	GSM954811	GSM954803	GSM954794	GSM954823	GSM954822	GSM954799	GSM954812	GSM954795	GSM954791	GSM954816	GSM954804	GSM954801	GSM954807	GSM954798	GSM954806	GSM954817	GSM954820	GSM954805	GSM954818	GSM954792	GSM954825	GSM954813	GSM954819	GSM954824
HALLMARK_EPITHELIAL_MESENCHYMAL_TRANSITION	-2.67278	-2.37465	-2.01279	-1.55517	-1.34484	-1.10617	-0.964012	-0.560761	-0.39463	-0.393321	-0.332026	-0.302517	-0.164422	-0.0852481	0.0514667	0.084286	0.106767	0.209778	0.335397	0.362894	0.384802	0.450773	0.525871	0.546232	0.552208	0.607913	0.6464	0.667432	0.669328	0.672517	0.719652	0.789054	0.873654	1.04497	1.24193	1.27631	1.4437
Sample	GSM954809	GSM954821	GSM954810	GSM954826	GSM954796	GSM954793	GSM954814	GSM954800	GSM954808	GSM954790	GSM954797	GSM954802	GSM954815	GSM954811	GSM954803	GSM954794	GSM954823	GSM954822	GSM954799	GSM954812	GSM954795	GSM954791	GSM954816	GSM954804	GSM954801	GSM954807	GSM954798	GSM954806	GSM954817	GSM954820	GSM954805	GSM954818	GSM954792	GSM954825	GSM954813	GSM954819	GSM954824
ABI3BP	8.19585	7.90594	8.1486	7.90774	8.70345	7.96433	9.9553	7.96205	9.26848	8.27753	9.73653	8.00596	7.91915	10.4896	8.3167	9.02505	10.0731	8.8483	11.0725	10.7221	8.75698	9.79272	9.19958	9.80268	9.97771	8.56042	10.1435	11.4685	9.92768	10.6049	9.83173	10.4181	9.54115	10.1111	9.75263	9.92308	9.2333
ACTA2	13.7272	10.5622	11.6306	12.828	12.7279	12.1154	11.4417	12.3286	11.862	13.0297	13.9658	14.5316	14.0023	14.4762	14.9942	14.0183	14.7057	14.3495	14.0183	14.8159	14.6356	14.7823	13.7301	14.3276	13.8778	15.0474	14.8316	15.1395	14.7575	14.7883	14.6156	14.8959	14.925	14.5444	14.9099	14.0917	14.935
ADAM12	8.51888	8.40925	8.09931	9.63836	8.45794	9.75198	8.70971	9.41189	8.6916	9.84001	8.43484	8.97941	9.15103	8.45291	9.6851	9.08406	9.62198	8.16152	8.81674	8.90863	8.72315	8.13128	9.22329	9.22617	9.58958	8.81484	8.15234	9.2721	8.88677	8.49004	9.2344	8.84237	8.67196	9.17259	9.06251	9.72785	9.27065
ANPEP	8.64256	8.13199	7.96898	8.91294	7.98566	7.91928	10.7181	7.94674	9.19996	12.4058	7.88273	8.12718	8.27845	9.42562	7.89429	9.79891	11.893	8.03786	9.48623	10.3851	10.777	8.37184	8.70937	8.81435	9.20623	11.0638	7.98841	10.1369	9.5652	8.49132	8.54739	9.13498	11.0763	11.8021	9.18567	10.1908	9.57375
APLP1	8.05882	8.18294	8.42596	9.56864	8.01995	8.35286	9.77064	8.67639	8.58154	8.98051	10.1166	9.37866	9.58708	8.22677	9.02986	9.45008	9.83964	9.55039	8.96374	9.41876	9.52341	9.44638	8.85369	8.54124	9.70696	9.48758	9.58075	10.8109	9.38204	9.42689	9.28336	9.50469	8.94633	9.18674	9.45044	9.69726	8.73054
AREG	7.84946	7.84819	7.84824	7.89653	7.90057	7.89548	7.83202	7.93411	7.90554	7.87533	7.86463	7.83937	7.86834	7.92601	7.84545	7.79949	7.86055	7.83211	7.85535	7.89868	7.89159	7.85535	7.86041	7.90709	7.83656	7.83885	7.87246	7.86237	7.83042	7.84345	7.81756	7.8681	7.89975	7.8438	7.88676	7.86186	7.86479
BASP1	14.2371	11.3185	13.9423	12.999	11.0932	10.9265	10.4447	10.7063	10.9564	10.8836	11.4579	10.6438	10.585	11.342	13.5057	9.54213	8.60051	13.02	9.99	11.4866	13.01	12.9335	12.4022	9.94573	13.9245	13.8134	14.0117	12.7652	12.1698	12.4431	13.4707	11.2261	13.2905	12.2196	13.4752	12.4662	13.0759
BDNF	8.38818	8.47557	7.91519	9.24466	8.96882	8.78376	8.67669	8.74253	8.87931	8.53172	8.62993	8.40619	8.33733	8.60364	8.50449	8.71016	8.49401	8.00845	8.69279	8.41179	8.27062	8.75137	8.18056	8.30966	8.3029	7.9551	7.93043	8.7193	8.34262	8.09379	8.27274	8.23033	7.99385	8.26128	8.13641	8.10252	8.26318
BGN	14.1692	13.1773	14.5134	14.607	15.3719	14.1468	15.0081	15.302	14.5134	15.2335	14.4385	15.3646	15.1953	15.2335	15.0906	15.3088	15.1395	15.4963	15.4313	15.4402	14.7036	15.1834	15.5153	15.529	15.3247	15.0298	15.3646	15.1538	15.1335	15.7003	15.2955	15.5153	15.4851	15.4851	15.5048	15.8101	15.529
BMP1	9.34744	9.33547	9.0206	10.5166	9.1992	10.019	8.83314	8.45754	8.76679	11.1213	10.1204	10.1785	9.87646	9.15298	9.90653	10.6575	8.36467	9.89655	11.1831	8.76404	10.2164	10.4691	10.1397	10.4088	9.19437	10.0362	9.38759	8.87542	9.52485	9.5094	9.57926	9.78696	10.0609	10.8557	9.86939	10.1643	9.83986
CADM1	10.1343	9.71596	8.52028	11.0144	11.1944	14.038	11.565	11.6667	11.2776	13.9584	12.9507	13.4381	13.2375	11.4898	12.719	8.959	12.9933	13.2698	10.9831	13.4966	10.9128	11.627	13.9779	12.0992	14.0338	14.1638	14.0205	12.1698	13.818	13.6594	13.7225	12.2348	12.9823	13.9584	12.2594	14.071	11.6312
CALD1	9.78938	9.79842	9.65059	8.95288	9.94818	9.90897	8.99094	10.4288	9.51488	9.49526	9.97013	9.70811	10.0901	10.2626	10.2956	9.68434	10.6525	10.1692	11.1195	9.97698	10.4311	9.91442	10.8977	10.8475	9.6914	10.2036	10.0643	10.9262	10.4071	10.683	10.475	11.3539	10.4717	10.1095	10.7538	10.7953	10.0801
CALU	9.22568	10.4519	12.5563	7.91385	11.0358	9.16329	7.87489	8.7776	13.6834	8.23245	10.829	10.6091	10.1017	7.91664	11.0745	12.2998	11.6337	10.2452	7.84345	8.97161	11.4739	11.0664	11.4841	11.2379	11.1694	11.4224	11.591	9.57499	11.3515	10.3597	11.0489	11.4371	11.8974	11.7069	10.4941	11.2802	10.7904
CAP2	7.8614	8.09973	9.38332	7.98665	7.89035	7.84498	7.90339	7.88524	7.94452	8.15799	7.91483	7.90052	7.86041	7.88158	7.8865	7.95346	8.02803	8.41187	8.21036	7.91112	8.00353	7.96317	7.86917	8.0111	10.3335	9.09983	9.45028	7.93956	10.8384	7.90807	10.8908	7.81841	9.23709	8.89506	9.58053	7.96372	9.41086
CAPG	9.34008	8.11063	8.62533	7.96175	9.48602	10.1101	9.31345	9.25617	8.57988	8.61573	8.8424	8.72362	9.38112	8.56611	8.2006	9.23387	8.26817	8.13157	8.81142	9.18522	8.93406	8.05292	8.09121	8.13754	8.3254	7.9142	8.11159	9.04059	7.97607	8.01813	7.94343	8.35677	7.96121	8.45059	7.97284	8.08089	8.14996
CD44	9.8798	10.3714	11.1183	9.96015	9.46738	9.27941	9.45398	11.4862	9.26196	10.078	10.4599	10.5905	10.4938	11.1331	9.48411	9.46851	10.0759	10.413	9.9529	11.7066	10.0882	9.70047	9.34007	7.99681	11.7163	10.9202	10.3782	11.4876	10.3635	10.0949	10.2318	11.1826	11.2	10.7281	10.6782	10.9683	10.9136
CD59	8.30444	8.48116	9.30286	9.89796	7.90163	8.66609	9.77823	9.37147	10.0847	8.04515	8.94319	8.08082	7.8754	8.70756	8.51106	8.12614	8.60439	8.27491	8.86864	7.94412	8.98614	8.83263	8.72811	8.32437	8.40559	7.99036	8.7017	8.95199	8.52389	8.49267	7.93665	10.1206	8.37154	8.80302	8.25413	8.15211	8.746
CDH11	7.903	8.72056	8.23174	7.99821	7.83033	7.86675	8.05885	11.3265	9.67884	10.6538	9.76957	10.7915	10.6122	11.0204	9.07502	7.88643	10.8836	12.2233	9.69748	13.3737	10.5524	11.1895	9.62592	9.63667	11.8829	13.8767	13.5942	12.3042	13.8999	11.1698	12.1401	10.4289	12.1231	13.0742	13.2266	12.2939	12.618
CDH2	8.1132	7.85114	8.10971	7.90774	8.18367	8.05762	11.5573	10.35	11.7694	10.1653	11.2993	10.2603	11.0564	10.4033	10.332	10.4744	10.3221	9.37779	10.7759	12.4168	8.98447	10.0817	11.7149	10.1401	9.9827	8.6992	9.33127	8.38683	10.6049	9.07856	10.1585	10.0008	8.58553	10.159	10.4139	9.46516	10.962
CDH6	8.33913	7.95875	7.88495	9.24996	8.00219	9.02307	8.16538	8.80486	8.75534	7.9792	8.48142	7.92934	7.90402	10.643	9.18735	7.95448	8.0764	7.87764	9.30558	8.53182	7.92432	7.99647	9.34457	7.92929	7.86885	7.9281	8.16407	7.98535	7.95228	8.34004	7.91011	7.84261	8.91791	7.89478	7.92709	7.88819	8.72033
COL11A1	8.50821	8.70365	8.49961	8.42867	8.70821	9.34679	9.18813	9.34429	10.1367	9.147	9.15048	8.39335	9.45148	8.69765	9.43188	9.65614	9.91717	9.69234	9.43071	9.30934	10.5889	10.6738	9.97228	11.7831	9.84923	9.85642	10.2683	11.1222	9.41614	9.1401	10.4234	11.8773	10.3186	9.24678	10.7729	10.9203	9.90052
COL12A1	8.39803	8.22032	8.6056	8.91768	10.3731	10.219	8.89759	9.35429	8.38785	9.09876	9.19319	8.17053	8.04053	8.67495	9.48806	8.91575	9.15904	9.444	9.39561	8.7269	8.4091	9.27494	8.87835	8.666	9.43513	8.29511	9.15975	9.17153	8.84413	8.38844	8.52776	9.17046	9.28245	8.70104	9.67597	9.35022	8.27734
COL16A1	8.12361	9.30661	9.32356	10.0571	13.2721	13.0696	10.6271	11.3446	11.1657	11.1465	11.0209	11.2712	12.2768	10.777	13.7977	11.2166	11.8109	11.6856	13.7944	13.0313	12.4933	10.7522	13.304	12.4458	12.6512	12.3597	13.0595	12.1772	12.7931	13.4043	11.9829	12.8887	12.9619	12.0744	13.4695	13.1113	11.9712
COL1A1	10.5897	12.7697	14.4071	14.9942	14.7726	14.3082	14.7856	13.3273	12.2006	14.8045	14.0667	14.9422	14.8019	15.2006	15.1646	14.8292	15.0523	15.2129	15.2748	15.3529	14.7698	15.0419	14.3912	14.7519	15.0857	15.2561	15.2561	15.2608	15.1834	15.0259	15.2006	15.0857	15.105	15.1538	15.2561	15.0259	15.07
COL1A2	10.4803	11.3276	9.68803	11.6428	14.2395	12.026	11.4841	14.1156	12.39	13.5911	13.4152	13.277	13.1548	13.8461	14.0754	14.2388	13.4937	14.0859	13.7127	14.2579	13.4492	13.5772	13.5863	13.7092	13.7452	14.0237	13.6917	14.0319	13.8519	13.646	12.8966	14.3537	13.8337	13.8126	13.8624	14.1282	12.947
COL3A1	10.5233	9.48802	9.69895	10.9963	13.8306	13.5533	10.6728	13.4274	11.4817	13.2292	13.6725	12.8668	13.1598	12.3979	12.6559	14.5423	12.0227	12.8897	14.0193	13.7012	13.5169	12.2369	13.9539	13.5649	11.6436	12.9948	13.1954	14.2953	13.4069	14.0887	12.8978	14.716	12.7669	12.7714	13.9406	14.1125	12.2611
COL4A1	9.6934	10.1464	10.8718	10.6617	11.9485	11.3289	11.1525	11.5124	11.0731	13.0435	11.285	14.0482	13.3159	13.0935	14.6505	10.5544	14.3378	14.3617	14.0831	13.5579	14.0322	14.6464	13.1503	13.4876	13.8947	14.418	14.7186	14.4678	14.1416	13.2191	13.8601	12.9375	14.692	14.5386	14.9531	13.9874	14.4948
COL4A2	13.8505	9.15574	8.6992	8.30759	10.6547	8.50476	12.2648	8.40382	9.62979	10.618	12.0588	9.69608	10.9945	10.7972	13.2858	11.6683	10.3344	9.75578	11.1574	9.61469	9.70765	10.0196	10.5093	10.9892	10.1345	9.38269	8.93597	10.4389	9.53259	9.34697	9.02551	12.3875	10.0434	9.97036	10.1438	10.5183	10.3633
COL5A1	9.04474	9.56936	9.61642	10.1243	13.247	12.9894	12.0754	12.4686	11.1416	11.1702	10.6995	11.6771	12.5594	11.6351	13.5311	11.4185	11.3772	12.3979	12.13	13.2043	11.7173	11.8473	12.2493	11.8612	12.6235	12.411	11.6261	12.2134	12.2442	12.6651	12.0712	11.6995	12.1419	11.8306	12.5028	12.697	11.7761
COL5A2	7.89411	9.40812	8.76106	11.3385	8.14172	13.7195	9.49246	9.75242	10.8849	11.2042	11.2379	11.0535	11.1644	12.697	9.93425	11.0782	12.3476	12.5498	11.4882	11.095	11.2794	13.1462	10.5089	11.84	12.7118	13.1005	13.1376	12.7089	13.1005	11.9347	12.1493	11.8492	12.1726	12.5712	13.1113	12.2693	11.954
COL5A3	8.42656	8.0285	8.14692	7.95975	7.85049	13.8134	13.4707	14.0846	8.13308	11.0185	7.90622	9.30857	9.06874	11.7488	7.86851	7.86813	10.9756	9.47943	10.0721	11.8786	7.82795	7.84681	9.13635	10.1693	8.95805	8.87062	10.709	8.40876	9.76844	9.78856	8.09906	11.1965	8.85153	10.6644	9.95773	10.1061	9.78676
COL6A2	9.28666	8.11007	7.91988	8.38541	9.15982	8.84495	8.76123	8.10441	8.46578	8.09565	8.92665	7.98072	8.07708	9.0299	8.20315	9.58521	8.45022	8.07829	9.72196	8.54113	8.01693	8.02887	8.30861	8.28895	8.26902	8.43254	8.44048	10.2163	8.39906	8.70081	8.48811	8.96968	9.12334	8.90074	8.50225	9.19996	9.4129
COL6A3	9.47839	9.7158	8.75041	9.42446	10.6938	10.6559	10.2621	12.1372	11.4965	11.1132	10.1599	11.195	12.1113	10.7499	10.7626	11.6327	11.1492	10.905	12.1367	12.2958	10.2622	10.4506	11.5333	10.5998	10.8416	12.2792	11.6462	12.6178	12.2136	12.9709	11.2436	12.6009	11.2805	11.3763	12.1928	12.3098	11.6804
COL7A1	8.76996	9.38647	11.5637	7.87764	7.93958	8.29086	8.10656	8.22747	7.93681	7.88647	8.1743	7.96705	7.94147	8.11464	8.05103	8.01908	8.38855	8.77208	7.93225	7.89109	7.95625	9.88822	8.03841	9.589	8.88845	10.037	10.1592	8.58819	9.4547	8.01264	10.2899	8.70422	11.3515	9.34544	9.95406	11.0731	12.3338
COL8A2	8.64191	7.96425	7.98136	8.42709	9.21104	9.44097	8.96889	9.16046	9.01751	8.5867	8.82882	8.20285	8.22965	9.28427	8.44808	8.97076	8.6036	8.35209	9.34004	8.84898	8.35482	8.09538	8.85337	9.39236	8.97238	8.57959	8.62232	9.03685	8.25763	9.27347	9.68242	10.0399	8.96295	8.23381	8.73763	9.22426	8.57183
COMP	7.88794	7.97197	8.02195	7.85968	7.86233	10.2628	7.88803	7.90464	9.66144	7.86569	7.86463	7.86782	7.87541	12.4231	7.93861	12.3416	13.2738	10.0789	12.5928	8.00338	9.57161	11.9501	7.88446	12.6911	8.90098	8.46966	10.2482	14.3758	8.188	10.9577	11.0304	13.4519	12.322	12.9743	10.2184	13.4535	13.1486
COPA	12.0588	10.288	13.6961	9.44403	9.76861	13.6694	11.816	10.5448	9.6039	10.4715	11.4362	11.3024	11.8422	9.91904	10.8219	10.8818	10.7422	10.9317	10.4353	11.2401	10.3492	11.1481	11.1262	11.0981	11.0257	11.6109	12.858	11.1495	11.7678	10.9408	10.5675	9.78218	11.5892	11.2578	11.7315	11.1047	11.4882
CRLF1	8.33722	7.99358	7.91437	8.26331	8.83403	9.7496	9.31345	9.90772	9.19996	9.43836	9.37578	8.05942	8.22967	8.61617	8.85106	9.686	9.45616	8.30064	9.62499	9.67224	8.28544	8.31622	8.51243	8.97896	9.2282	8.12628	8.03119	9.95838	8.02058	8.08189	8.3085	8.76674	8.15389	8.1796	8.13722	8.36878	8.0392
CTGF	9.01353	8.35794	8.14547	9.6231	10.8254	12.7178	10.8305	10.0348	9.62238	9.57082	10.4548	8.43771	9.48529	9.58358	10.9454	10.4408	9.99532	9.1461	9.784	10.2808	8.57577	8.98598	9.05831	9.48791	9.73627	9.04955	8.79741	11.297	8.67536	9.04133	8.6057	9.8939	8.84139	8.78603	9.37873	9.12264	9.39721
CTHRC1	8.64433	9.19106	8.95123	9.35438	12.7394	9.01872	11.9939	11.1003	11.5881	10.8481	11.0859	11.3916	12.681	11.3324	13.7319	11.4427	10.7692	12.2076	10.7873	12.1197	11.7423	12.1399	11.3588	11.7721	12.1899	12.696	12.1427	11.1901	11.6018	11.3372	11.859	10.3702	12.2391	11.9	12.0677	12.537	12.0753
CXCL1	7.88113	8.21552	8.00187	9.69535	8.51458	9.30015	7.95404	10.8229	9.15918	9.85827	10.5825	8.64941	9.29312	8.12516	7.91593	10.5389	8.53416	8.25445	8.09171	7.90207	8.28998	8.8115	9.11327	9.43902	8.92664	8.32992	8.02496	11.2955	8.32128	9.1461	8.21495	9.91334	8.13229	8.31481	9.41472	9.10275	8.00937
CXCL12	9.52987	9.84026	7.87609	8.25436	7.99781	8.28032	8.07972	8.01869	8.51032	8.06793	8.27553	8.4639	8.42362	8.47272	8.87523	9.59321	8.06305	8.12411	8.0778	8.32237	8.44407	7.91555	8.9432	8.865	8.21956	8.93395	8.5726	10.1641	8.22127	8.52963	8.59025	9.02598	8.42577	8.24355	8.52524	8.16874	8.8315
CXCL6	8.03904	8.0274	7.9466	8.18633	7.92513	8.01334	8.03072	8.55005	8.00318	7.98412	7.98995	8.18806	8.1559	8.4572	8.01593	7.8983	9.10472	7.8801	8.39482	7.95661	8.11133	8.15388	8.75287	7.98552	7.97627	8.074	7.99313	7.90405	8.10762	9.30272	7.94177	8.11087	7.93061	7.93688	8.71035	8.48601	8.01055
CYR61	8.42656	8.91441	10.3492	8.05413	14.4655	7.86545	7.88192	13.8778	9.38952	8.36895	7.99565	7.90003	7.9719	8.85457	7.87255	8.17228	8.1274	8.60382	9.32247	11.6718	7.94111	11.3947	7.96469	7.9429	11.034	8.82603	10.013	7.84334	9.71325	7.99838	8.12122	8.06851	9.37634	8.92227	12.0834	8.12465	10.9912
DAB2	10.8436	10.2441	10.9862	10.4419	13.4083	13.0441	14.3291	12.9598	12.427	13.7351	13.5431	13.3967	13.9453	13.8128	14.1974	14.4111	13.141	13.147	13.6553	14.1511	13.5263	13.121	13.9058	13.2711	13.5371	13.2203	12.7944	14.0096	13.2534	13.7021	13.6417	14.2024	12.9103	13.4464	12.9379	13.5363	13.2623
DCN	10.2459	9.0695	8.74744	9.41574	13.5285	11.5935	10.3761	10.4252	11.1387	12.1671	14.3777	12.9446	12.2177	11.1305	12.8536	14.2413	13.2818	11.3158	14.3063	11.2457	13.4439	12.2993	13.3033	12.9693	11.5713	13.1957	13.7863	14.3935	11.1206	13.6813	11.4813	14.2881	13.0039	13.0226	13.6629	13.0541	12.3736
DKK1	8.57805	8.48053	10.216	9.31316	8.5304	7.89691	8.1511	10.0365	7.93136	10.2103	8.07041	8.22056	8.21354	9.33716	7.86369	7.86904	7.88525	9.23439	8.15146	10.4048	7.86757	9.79248	8.55752	9.45223	9.0312	8.69429	8.97468	8.01619	9.21423	8.60591	7.91687	8.04807	8.02888	9.05352	8.31281	9.1277	9.20844
DPYSL3	8.07973	9.52541	8.79786	15.0999	10.0259	10.8625	10.0988	10.2889	10.9095	14.1206	11.3078	11.9379	11.2626	9.98374	11.4099	9.25339	14.2677	14.2234	13.485	11.1089	13.3628	13.8212	12.1755	12.2292	14.4612	13.7176	15.1894	14.4901	14.7937	13.8985	14.7251	12.5001	14.7994	14.1416	14.3163	13.7904	15.0906
DST	8.09029	7.9698	8.0643	7.95306	8.01815	8.95424	8.47273	7.94526	7.96325	8.56342	8.02605	8.53025	8.45283	8.1286	8.18636	8.46379	7.9204	9.11116	8.45547	7.90302	8.35744	8.75165	8.74872	8.97789	8.27299	9.04529	8.49418	8.05628	8.58556	8.82386	8.84617	8.66043	8.59996	8.68008	8.58251	8.87299	8.52307
ECM1	7.88766	8.17505	8.62031	9.63357	7.91379	10.146	9.40177	9.60612	9.06726	9.93604	8.73498	10.2848	10.1753	9.54356	9.74831	8.77314	10.9863	9.82177	10.245	9.35641	10.4464	10.5209	9.89665	10.9902	10.1523	9.72711	9.72284	11.4924	10.5428	9.03912	10.5096	9.39771	10.1715	10.4833	10.0957	10.1245	10.84
ECM2	7.87491	7.87472	8.25111	7.86448	7.89825	7.89119	7.85695	9.49049	8.54779	8.94804	7.86007	8.77382	8.64267	9.20503	7.96765	9.2819	8.9346	8.52856	9.44732	10.3077	8.32168	8.45923	8.66477	8.59848	8.85701	8.91251	9.39519	9.38757	8.80193	9.70486	9.04238	9.13303	9.31533	9.06658	9.74672	9.49497	8.71653
EDIL3	7.89832	7.92647	7.92262	10.0182	7.87991	7.85119	8.31471	7.96205	8.81771	7.83742	7.87245	8.50413	8.54088	9.05358	8.99531	10.5892	9.88151	8.58981	11.0109	7.93067	9.05962	8.79728	10.0925	9.6462	7.91197	8.6465	8.54013	8.40876	8.70555	9.94989	8.75319	11.23	8.43792	8.47768	8.49552	10.4474	8.69565
EFEMP2	7.96013	9.28483	9.18122	7.9947	11.5995	8.84823	9.39172	11.7391	10.6717	12.0608	9.47231	13.1647	12.7147	13.6	14.3925	8.47891	13.4495	12.8855	13.1754	13.8239	12.9066	12.799	11.4401	13.0709	13.9728	12.3512	12.1717	13.7977	13.2905	12.7517	13.0989	12.4209	12.5728	12.7005	13.8262	13.3273	14.2627
ELN	11.3902	9.14383	7.95518	9.01057	9.69419	11.4751	10.0493	9.72333	9.35318	8.8875	9.40909	8.02074	8.14561	9.02179	8.99345	8.94287	9.04049	8.69573	8.97845	9.47457	8.09513	8.97099	8.4987	8.63754	8.35059	8.05546	8.49051	10.9932	8.13677	9.88303	8.18138	9.16432	8.0647	9.17461	8.13767	9.1568	8.89392
EMP3	10.8213	10.0207	12.2181	9.17484	11.8223	7.91259	11.0578	10.6289	10.0369	9.43392	13.8816	11.5565	11.2804	9.58838	11.8623	10.0334	11.8745	11.4784	9.61865	9.87685	10.9937	11.7078	12.8703	13.1844	9.61179	11.0202	10.8248	10.745	9.3685	11.2924	11.431	12.3167	10.7248	10.8238	12.0841	11.0191	11.209
ENO2	8.09127	8.68642	9.06827	8.32965	13.2537	7.87082	7.90686	9.2433	8.22904	8.576	9.07674	8.65644	8.26021	7.9635	8.10504	10.6308	10.1828	10.1511	8.27544	8.08954	9.39115	9.94195	8.05238	9.3211	9.92094	9.60257	9.22494	8.49148	9.17357	9.91379	10.1413	8.05259	10.6688	10.1473	9.9942	9.73477	10.9694
FAP	8.06725	7.91171	8.38598	7.94896	7.90306	8.2233	7.87367	7.85044	8.94302	7.91204	7.88999	10.081	9.60441	7.99371	7.81711	8.22526	7.91273	7.9175	7.90302	8.05978	10.1824	7.92007	7.85257	7.92144	7.88339	7.9467	8.60814	9.17324	7.86421	9.95934	7.86077	11.6361	9.3326	9.32709	7.89246	7.86283	9.94908
FAS	9.10045	9.32813	8.87477	9.3224	9.44059	7.8654	9.23168	7.8829	7.95832	8.45974	8.62552	8.85834	8.69548	8.45829	9.12633	10.2512	9.9489	8.01772	9.78067	9.05816	9.64145	8.77027	9.04645	8.58491	8.37311	9.17115	8.92991	9.00458	8.78444	9.92908	9.65711	8.67667	8.3529	9.26893	8.85684	9.73822	8.89211
FBLN1	9.07904	9.29826	9.97054	10.4828	10.7573	9.6229	9.24512	9.44965	9.60754	9.33092	10.2679	10.074	9.99239	9.8415	10.511	9.92128	10.6567	10.0697	11.709	9.96625	10.7437	10.0136	10.3391	10.1025	11.1157	10.6379	11.2833	11.5535	9.35236	10.8345	9.83609	11.4718	10.0558	10.3568	10.9594	10.667	10.6238
FBLN2	9.30494	9.24182	8.26084	8.76917	8.71975	8.56208	8.86677	8.53077	8.80707	9.04133	9.99971	9.3845	9.42569	9.5473	9.23393	9.13155	10.6052	9.97629	8.98084	9.21222	8.43835	8.94052	9.36664	9.56861	10.1522	8.76894	10.4493	10.8683	9.61285	9.72094	10.2534	9.52937	9.71229	10.6261	10.4976	10.3747	9.23304
FBLN5	8.19148	8.03044	8.5477	8.22027	8.29098	8.7732	8.5502	8.17171	9.83881	10.0312	8.5023	8.67664	8.96711	8.17774	9.14653	9.56942	9.98944	8.7951	9.32981	8.25761	8.0345	8.24233	9.69388	9.91688	8.69551	8.6917	9.05544	9.33111	8.47372	9.49464	8.65262	10.2382	8.2761	9.33323	9.41342	9.63876	10.1843
FBN1	7.91698	8.18604	8.25703	7.90897	8.23944	7.89975	9.80545	12.762	10.4232	10.22	9.28862	8.959	9.83971	10.6228	9.5658	11.2555	10.0644	9.30267	11.1392	13.1462	9.76529	10.2811	9.75044	10.4003	9.8393	10.0431	10.0796	11.7432	9.70437	12.3453	10.4426	12.1456	9.40081	10.0098	10.511	10.7458	10.7733
FBN2	9.72004	9.6479	10.6733	8.01402	8.91294	10.3208	9.34867	10.3699	9.51048	9.08544	10.6378	13.1503	12.9335	9.33662	12.1452	9.6081	13.645	13.2587	8.06211	11.1124	12.8964	12.0558	12.9268	13.6807	13.5914	11.7496	13.1872	9.81727	12.1433	9.81564	10.808	11.4417	12.9324	9.38952	11.5196	12.858	12.137
FERMT2	9.45616	10.0838	10.9635	10.3409	8.41915	13.4185	12.5038	9.78632	11.0459	12.1422	12.3402	12.677	13.3584	10.9438	11.5936	10.9589	12.1755	12.6941	11.5956	11.1083	12.6655	12.3947	11.5734	12.6461	12.3357	12.8758	12.02	13.154	12.8378	12.8321	12.5752	12.8337	12.3663	12.5646	13.2416	12.8558	12.5472
FGF2	8.2333	7.89003	8.3071	8.82889	8.7299	7.94734	8.39324	8.36428	8.02442	8.22782	10.2006	8.32502	8.30779	7.91049	8.19189	8.64229	8.27473	8.07836	8.18779	8.17327	8.38663	8.11551	7.91997	8.13461	8.11035	7.90646	7.97808	8.32908	7.92042	7.89778	7.9475	7.91579	7.94446	7.94509	7.93961	7.95616	7.9503
FLNA	13.5607	10.0437	8.14725	7.99045	12.9718	12.4478	11.6478	11.5364	11.5173	9.87085	11.5765	8.48983	10.0166	10.3344	11.125	10.5681	10.0156	9.02796	10.8809	12.1746	8.83129	8.91353	9.27752	9.45311	9.71472	8.51763	8.19613	11.2158	8.53381	9.06016	8.83281	10.3324	8.57379	8.72271	8.77494	9.11089	8.97141
FMOD	9.96328	7.95271	8.10682	10.6151	9.9591	9.52249	8.21425	13.4335	9.60008	9.3685	9.24169	9.47592	9.9933	9.06327	9.00746	9.6934	8.96464	8.00818	8.98418	11.6204	8.11075	9.10841	8.69565	8.82771	9.34834	8.71652	10.7125	8.86275	9.48384	9.29807	8.27101	7.97163	9.4459	8.76796	10.3851	9.02008	8.54789
FN1	8.88305	9.12304	8.97335	9.44733	12.5193	10.534	11.5999	12.0774	10.173	12.3522	11.0807	11.8155	11.7113	10.6942	13.9154	11.9891	12.0239	11.9463	11.148	12.9059	12.3838	11.4224	11.7043	12.5232	11.763	11.9752	11.5497	11.8467	12.2241	12.3157	11.5718	12.1114	12.2246	11.2366	12.2848	12.155	11.8666
FOXC2	9.46697	8.53075	9.00518	8.85728	14.7856	7.84152	9.46256	8.81715	10.0721	8.68681	8.32237	10.4229	10.0946	9.06902	8.73674	7.92803	9.13044	8.34189	8.56696	8.99503	8.08761	8.10117	8.59433	8.10863	8.18109	9.6391	7.9167	8.96225	10.4288	9.86881	8.32378	8.97989	9.0213	9.13565	8.17695	10.0126	9.6391
FSTL1	7.82066	7.90347	8.11702	7.8994	7.81318	7.90193	7.81499	7.88812	8.23933	7.86471	8.44004	7.91915	7.84243	7.87667	7.82	7.85917	7.85406	7.87935	7.85198	7.86607	9.26575	7.85286	7.88208	10.0891	7.96416	7.88144	10.8361	12.7517	9.73711	10.9052	8.2135	9.90133	9.51888	9.46234	8.94521	7.89216	7.94903
FSTL3	9.17282	9.20007	9.91483	8.34027	9.06722	7.87583	8.13826	10.0196	8.13308	8.89053	8.59302	7.98378	7.953	8.10892	8.52425	8.81881	10.7346	9.45914	8.78351	8.56823	8.03537	8.13169	8.23451	8.22016	8.54207	8.08302	8.8548	9.36717	8.69283	8.07511	8.03344	8.06084	8.02184	8.04711	8.95085	8.06537	9.54136
FUCA1	8.09127	10.5667	9.3527	10.1717	7.85391	7.86675	7.86327	7.85783	7.86983	7.85483	7.84848	7.85038	7.84106	7.90725	7.88114	7.83505	7.88649	9.23087	7.99085	7.78627	8.99782	7.83014	7.8874	7.86682	7.86088	9.43367	8.91413	7.85877	9.30878	9.27658	8.10861	7.84594	8.67678	8.71	7.91255	7.96917	8.80483
FZD8	9.09481	8.36129	9.4136	8.52131	7.90558	9.82404	8.77913	8.50174	7.96534	11.9097	8.2366	11.2187	10.7779	8.03882	9.27966	7.87521	7.93634	8.24028	7.92789	7.94198	11.4754	11.533	9.67359	8.02754	9.27658	10.8547	10.9478	7.9645	10.8583	8.96658	9.48464	8.35677	10.8843	11.7351	10.9912	11.0414	11.0438
GADD45A	8.47291	8.36538	8.73438	8.05711	10.15	9.68767	9.96181	9.07146	10.1199	9.35054	9.86384	8.77333	9.64284	8.98944	10.7805	9.69208	9.42335	8.86039	10.3082	8.99015	9.81403	9.17744	10.4153	10.3999	9.16176	9.1894	8.92194	9.93232	9.15974	9.39507	9.69472	10.0259	9.25183	9.12411	9.0484	9.2785	9.40244
GADD45B	9.50705	10.0672	11.0084	10.7382	9.41077	13.8226	10.8483	12.3015	10.4512	12.4839	10.2402	12.8372	12.6429	13.5291	10.6777	11.4274	11.2866	13.1663	11.8315	14.2627	10.9228	13.0266	9.84246	13.8778	13.1188	12.1272	11.466	13.8601	11.1386	11.6651	11.6226	14.1315	12.1179	11.6529	14.1449	11.8774	12.7429
GAS1	9.5254	8.47945	9.83515	9.2725	9.79177	9.42283	10.6801	8.03523	9.52308	9.56737	9.82187	8.39195	8.43527	8.38167	8.73604	8.38443	9.02913	9.23314	8.50208	8.66988	8.2264	8.19736	8.52253	8.75076	8.84245	9.33391	9.17271	8.56773	8.75994	8.73327	9.18234	10.0667	9.00974	9.40523	9.95259	9.13763	8.97879
GEM	8.08568	7.91342	7.89447	8.21606	8.14274	8.03394	8.10002	7.99882	8.04257	7.98756	8.21896	9.17009	8.93503	10.649	7.89076	8.31832	7.96652	7.88972	9.19049	8.4314	8.87035	8.57663	7.92084	7.93144	8.42575	8.32187	8.40249	8.34578	8.92796	8.63316	7.95506	8.62404	7.93358	8.2015	9.47957	9.09815	10.0311
GJA1	8.18123	9.21788	8.84932	8.18104	8.41915	10.7429	8.53584	8.46282	10.7484	13.7841	10.6757	12.3402	12.2497	10.962	12.41	13.2238	12.358	12.6195	11.1613	9.68968	12.4772	12.3318	13.4876	12.1551	10.7299	12.7669	12.5905	10.5029	12.1456	12.8429	12.6131	12.5633	10.7164	12.2571	12.0079	13.0622	10.4468
GLIPR1	7.85985	7.85489	7.84065	7.83179	8.64238	7.84689	7.83883	7.85243	7.86812	7.91795	7.88851	7.82598	7.91632	7.85671	7.94695	7.86552	7.84814	7.83265	7.84681	7.88537	8.85425	8.75319	7.84792	7.89086	7.84757	8.40921	8.05284	7.88568	7.86372	7.84463	8.67487	7.89035	7.84796	8.2203	7.86012	7.85048	8.03607
GLT25D1	10.9213	10.4107	13.5962	9.33508	11.758	11.6844	11.209	10.9438	10.5392	9.62223	11.0638	10.1951	10.1127	13.5579	10.141	12.4985	9.56283	11.1786	10.7076	10.9381	11.1083	9.56204	10.4378	10.7473	9.52611	9.51458	11.6798	10.7484	10.203	11.0564	10.868	9.57338	11.6828	10.298	11.4073	8.8149	10.8135
GPC1	7.94012	8.45665	9.18312	8.24023	8.00819	7.87204	9.87024	10.3139	8.07969	8.13791	8.8757	8.91013	8.84761	8.63551	9.31538	8.08999	10.6963	9.77208	7.88973	7.89548	7.97372	9.04059	9.67998	8.09894	8.14926	7.953	8.86067	8.10114	8.35677	10.1674	10.3354	10.0054	8.94416	9.3061	8.74562	9.18788	8.77672
GPX7	7.84682	7.87024	8.19405	8.00956	9.41077	14.0742	8.20348	8.03558	7.86373	7.93175	7.95797	7.92242	7.82884	7.88158	10.975	7.97842	7.87203	9.16983	7.8572	8.17767	9.91725	11.844	11.6007	7.92839	10.2944	9.8062	11.3555	8.2317	11.1183	9.68984	10.8305	11.0328	9.57898	10.9838	11.8796	10.7904	10.1508
GREM1	7.89031	7.88669	8.00632	7.88038	8.26497	8.75025	9.79635	10.5538	7.94632	9.2223	8.68195	8.22552	8.45476	9.36579	7.99788	8.19638	8.11546	8.37217	8.39673	9.7207	8.39203	8.3499	8.06145	8.81095	9.08366	9.09282	8.04421	8.11126	8.62099	8.39519	8.40757	9.06952	8.20973	8.58289	8.62596	8.67545	9.42512
HTRA1	10.0541	10.1826	12.762	8.95014	11.2594	11.5225	14.202	10.508	11.2626	8.34876	11.3236	13.1221	12.5172	14.0502	10.9101	13.7133	13.2685	13.4993	14.1709	11.2435	13.8838	12.9437	11.4037	11.2639	14.0117	14.1601	14.5134	13.3303	13.8767	13.8572	13.1005	11.8886	13.7657	13.8151	14.3399	13.2214	14.1748
ID2	8.79088	8.8185	10.1205	9.51838	8.78439	9.14431	8.49744	8.93661	8.63462	8.7299	8.93696	9.47449	9.78736	9.69885	9.21436	10.0549	9.55323	9.46702	9.16288	10.0216	8.86775	10.0067	9.04616	10.6	11.2602	9.93416	9.62609	10.3893	9.57889	8.86846	8.76504	9.76374	9.29318	9.25527	10.187	10.0038	9.90043
IGFBP2	7.91094	8.15998	7.99096	7.90141	7.88156	8.14689	8.0394	8.16399	7.96534	8.38787	9.31317	7.90551	7.89757	7.91469	9.92558	8.19696	8.04039	9.55813	8.2152	9.76494	8.02268	8.18255	10.0421	9.8204	7.98915	8.29153	8.13077	8.10532	7.92913	7.97065	7.95295	7.85238	7.93426	8.62285	8.7874	8.38437	8.58561
IGFBP3	7.88961	8.56869	9.73631	8.05381	9.29333	8.50839	8.53648	7.92133	8.53382	8.57175	10.2086	7.96609	8.09426	11.7748	8.84157	8.91354	8.16566	9.03063	10.0145	9.5102	9.35279	9.73085	9.0627	8.29842	10.8535	10.0438	11.9087	8.24724	10.0789	8.54741	9.49439	8.51447	9.45838	9.87179	10.2535	10.5419	8.9386
IGFBP4	15.0081	10.7299	9.34119	8.48737	10.5156	15.1438	9.85969	12.4786	11.6291	8.43494	11.3041	13.0989	12.0608	9.88115	10.7951	14.5298	14.5747	13.6793	11.1923	14.9749	13.2571	13.7977	11.1624	13.2115	12.7454	14.528	14.3354	15.0523	14.2662	14.071	14.4436	14.692	14.0934	14.7036	14.0023	12.5429	14.0482
IL15	7.93619	8.09948	8.31202	8.82638	8.36503	8.60112	7.92757	7.88303	7.88405	7.98843	7.97599	7.88348	7.87017	7.949	7.972	7.87937	7.94411	7.96369	8.88528	7.95873	8.75398	8.27453	7.95582	7.97527	7.87258	8.21983	8.07358	8.22698	8.2081	7.99225	8.4279	7.95289	8.40086	8.09792	7.99952	8.02113	8.20815
IL32	10.3992	8.26519	8.20984	7.95461	12.0692	8.60933	10.5244	8.48133	10.7441	9.17767	14.3289	9.04624	9.11596	9.5639	9.37093	10.8175	8.17315	7.92624	8.83259	8.1061	9.40371	8.70023	9.77277	9.7773	8.02581	9.12582	8.88778	10.0839	10.6592	8.58385	10.5501	9.02158	9.24716	9.43824	8.33323	8.70076	9.49573
IL6	8.1132	8.75975	10.2369	13.0688	8.96706	8.04242	8.11389	8.96778	7.93681	7.95484	8.49576	7.93467	8.07459	8.11994	7.95493	7.92437	8.42799	8.49215	8.31429	7.96317	9.8393	7.93363	8.00278	11.2578	8.08844	7.89426	8.75642	7.94224	7.90766	7.96349	7.99458	7.95446	7.92238	7.95968	7.93035	7.92321	9.2034
IL8	8.10989	8.17667	8.06321	8.73137	10.1244	7.99424	9.44457	8.1628	8.54653	8.7289	9.65364	8.03479	8.13935	8.71306	8.63862	9.01642	8.72219	9.0483	8.99928	9.38507	8.20041	8.14853	8.43071	9.20608	9.79375	8.75306	7.92883	9.47577	8.07154	8.25524	8.1966	8.72061	8.66419	8.89781	9.2681	8.35831	8.11165
INHBA	10.9569	11.0646	8.1384	8.14804	13.35	13.0569	12.1392	12.6807	8.98452	8.3431	8.2366	9.64869	11.334	10.4992	10.7211	11.0431	9.86714	9.32069	11.1741	12.719	8.90883	9.50118	10.9088	10.5931	9.91934	9.60178	8.86224	9.30078	8.38591	10.6407	8.68186	11.8033	9.30602	8.5745	10.0792	10.8425	10.0644
ITGA2	8.61918	8.69512	9.36803	10.7672	7.90558	9.05769	9.31345	8.11564	8.21043	10.3131	10.0242	10.5688	11.1899	9.6293	9.43476	9.06548	10.7196	8.49777	8.50495	9.55129	10.187	10.2151	9.94123	9.69714	8.15774	10.4045	8.53389	10.486	10.4774	9.25804	8.96618	9.42019	9.36463	9.81564	8.29548	9.34579	9.43102
ITGA5	10.6228	10.6318	13.3679	13.4078	12.3187	12.1204	14.2662	12.4543	13.6039	14.5009	13.5669	14.7142	14.4523	14.5621	14.5662	14.2069	14.5544	14.4436	14.7883	14.8104	14.7186	14.6393	14.556	14.4578	14.3224	14.6966	14.1299	14.5009	14.6464	14.3876	14.8212	13.8151	14.716	14.7625	14.6204	14.6356	14.7937
ITGAV	8.8289	9.48227	11.4152	8.93005	7.93958	14.2111	7.88936	8.24081	9.24432	10.8061	9.56222	10.1495	10.2048	8.78033	9.93007	8.35632	11.0071	10.9641	8.68688	10.5396	11.5386	11.7143	10.7668	10.1725	11.9997	11.9551	11.0109	12.3536	12.204	10.52	11.9079	9.9364	11.4117	11.3635	11.356	12.2224	11.2567
ITGB1	8.5546	9.03715	10.099	9.67628	10.2903	9.08953	9.06113	10.1684	9.77549	10.2209	10.2978	9.83884	9.80448	10.2823	10.1597	10.1687	10.4047	10.0867	10.3073	10.0717	10.3542	10.4365	10.2388	10.1867	10.3291	10.4462	9.92764	10.2208	10.3312	9.94056	10.1515	10.0192	10.0062	10.1557	10.4156	10.1413	9.96236
ITGB3	9.68563	7.9917	8.1023	10.6985	7.96103	10.5987	8.3803	8.00542	8.5389	8.93327	8.30555	9.60558	9.67049	9.45781	9.50725	8.7849	9.89169	9.00422	8.76965	8.66774	10.8963	9.92657	10.1388	9.85444	10.3935	11.7391	9.76975	9.13055	11.4159	8.24328	9.60651	8.86275	8.6008	10.6543	8.32916	10.3821	8.52257
ITGB5	9.42677	9.73143	11.3753	10.0205	10.1731	9.85943	11.1211	10.5017	10.3332	11.9184	10.1727	12.4295	11.9728	11.2708	11.0817	11.1435	12.2164	12.7238	10.9054	11.9126	11.9607	11.9517	11.5918	11.4475	12.0073	12.5863	13.2082	11.7317	11.9685	12.2746	11.8934	10.3457	12.3454	11.8884	12.0494	11.8027	12.5969
JUN	9.18624	10.508	10.829	12.8181	11.1379	10.1254	11.4254	12.3936	11.2261	13.4519	13.4381	13.2627	12.6883	14.5529	11.4802	9.50668	14.2662	14.595	13.0141	14.9012	13.4212	13.197	11.7204	14.7228	14.9604	14.3116	13.9079	14.7426	13.8463	13.8122	13.9728	14.602	14.2497	13.6563	14.8045	13.5323	14.122
LAMA1	7.87305	8.35553	9.7217	7.86793	7.86864	7.85069	7.86862	8.56102	8.56804	7.82611	7.8854	7.87178	7.93217	7.84719	7.9766	7.87171	7.89543	8.22881	7.8926	7.87268	9.06835	7.83318	7.8599	7.87334	7.86888	7.83229	8.07577	7.86421	7.86599	9.06257	7.85116	7.84354	7.85913	7.85166	7.84255	7.84054	8.13091
LAMA2	7.93806	7.89663	8.14678	8.03613	7.89241	7.92435	9.18242	10.1795	8.12592	8.56107	8.63588	7.98971	8.01072	8.04242	9.67216	10.1398	8.6056	8.02004	8.59026	8.46192	8.12739	8.81033	9.51261	10.3594	8.25999	8.49729	8.52439	9.04905	8.63209	9.17696	8.73589	8.52739	8.50486	9.11051	8.02577	9.49693	9.37102
LAMA3	9.97721	10.5332	8.6122	8.98557	7.8823	8.13741	8.26745	8.64838	7.96374	7.91519	7.96815	9.37581	8.96957	7.88917	7.95045	7.89469	7.94171	8.03903	7.90833	7.85365	7.8827	8.40973	7.88965	7.87338	7.87078	7.87463	7.8621	8.05461	7.88295	8.04222	7.8767	7.87869	7.85672	7.87578	7.89379	7.89861	7.85848
LAMC1	7.88605	7.88639	8.38851	7.88794	7.89865	9.54184	8.0394	7.86816	7.85966	9.89062	7.95797	8.61641	9.17077	7.93346	7.88272	8.68222	10.1511	8.87621	7.89359	8.10314	9.43456	9.16157	9.15017	9.43075	9.84223	9.2689	8.79584	7.89087	9.62649	9.27015	9.07407	8.05259	9.12878	9.38789	9.27798	9.30196	9.61341
LAMC2	9.39228	9.53586	7.91242	8.82251	10.0289	8.30256	8.38457	8.98291	9.62759	9.69762	8.51108	8.88918	8.94098	8.85615	10.576	8.32151	10.001	8.1135	8.51796	8.18425	8.97656	8.30556	8.91687	8.58432	8.8551	7.88847	8.19743	8.36029	8.7318	8.6778	8.51616	8.35903	8.41507	8.54921	8.83499	8.14884	8.71885
LEPRE1	9.04474	9.52013	10.5931	8.73753	9.78905	10.276	10.1343	11.993	9.97602	12.9525	10.4922	11.07	10.6661	13.6101	11.8041	12.3261	12.383	12.2892	12.8116	14.1734	12.3902	11.5596	12.5633	10.3625	12.5543	12.063	12.7044	10.5335	13.1164	11.7288	11.3987	12.3091	13.2537	13.2537	13.231	12.322	12.1382
LGALS1	8.59554	10.3636	13.2266	7.92453	8.54584	11.2435	8.50183	7.98359	10.0745	13.2404	10.0748	12.358	12.0348	9.95206	11.9642	13.9567	11.9988	12.9525	13.1258	9.2133	12.6306	11.8326	12.9638	12.6941	9.63884	12.8411	12.3351	13.4351	12.0814	11.7951	11.7885	13.35	12.2901	12.0774	12.3488	12.6606	12.6263
LOX	7.89832	9.01469	9.82567	7.83572	7.89653	8.0127	7.85768	7.87622	9.96566	10.84	7.9359	11.5296	11.4283	7.84538	9.34525	12.1171	7.87255	11.2749	7.8911	9.83271	10.6118	10.7507	10.3016	11.6819	11.5565	11.967	11.5272	13.3645	12.4196	11.4109	9.53791	10.4749	11.3024	11.6985	11.4325	12.2493	11.1735
LOXL1	7.92758	7.87671	7.91176	7.92604	8.38741	9.34568	7.8629	8.24382	8.17673	7.91111	7.91144	9.02419	8.71647	9.91797	8.36826	8.06143	7.89405	8.7525	9.01431	7.90172	8.96422	7.89844	8.80595	7.91331	8.18585	7.8476	8.05547	7.89492	8.38734	8.46595	9.5123	7.90433	8.65083	8.59918	9.41429	7.91103	8.77095
LOXL2	7.87454	7.92149	7.9522	7.94896	7.88156	7.87204	7.95797	8.08389	7.91594	7.84576	7.81756	10.4424	9.61505	7.85576	7.90246	7.82341	8.07227	7.81815	7.88845	7.94515	7.85828	8.40482	7.90595	7.95021	7.88037	8.09529	7.86997	7.8166	8.08966	7.86962	10.4149	7.8614	7.92176	7.88524	7.91928	8.02238	7.85807
LRP1	7.90052	8.18128	8.63215	8.12705	7.8832	7.83933	7.95045	7.8827	8.5389	10.4953	7.96778	8.94638	9.02016	8.03048	10.3495	8.17228	7.96292	9.65216	7.92179	7.85338	10.1307	9.49526	10.8322	11.3644	8.34868	9.00618	9.21388	12.033	9.57351	9.75014	9.00254	9.91067	9.30544	9.66249	9.57529	8.11559	9.58526
LRRC15	8.47493	8.22326	8.16102	9.63828	10.2225	9.7694	11.7173	10.8281	9.46543	10.2091	10.6519	10.5742	12.5283	10.3781	13.1026	10.84	10.5957	9.3432	11.2258	12.4431	9.91658	9.49332	9.92841	9.67479	10.4336	9.83481	9.38992	11.3497	9.5205	9.84904	9.6652	10.0641	10.5037	10.0597	9.98611	10.2985	11.0018
LUM	8.05377	8.37601	8.38243	9.3246	12.1443	9.48382	7.89241	9.871	9.60543	11.578	10.8256	10.0763	9.58396	9.13213	9.45368	11.3218	10.6994	10.1032	12.0481	11.0581	11.3095	10.852	10.41	10.4352	10.8715	11.6843	12.4992	8.5343	10.6171	11.5019	10.2734	9.57903	10.6379	10.6869	11.276	10.9565	10.1352
MAGEE1	8.78777	8.06945	8.00046	8.23872	9.47374	7.98003	9.27705	8.67613	8.35465	9.01196	8.19785	8.01609	7.91393	8.83905	8.1588	7.94938	8.97874	8.11524	9.8489	8.35611	8.72704	9.20685	8.39027	8.15683	8.57299	8.02167	8.61896	8.59961	8.67648	8.49115	9.131	9.01937	9.05825	8.41508	8.45417	8.65371	8.71078
MATN2	8.75472	8.69694	8.49115	11.0553	9.65664	8.30868	8.1313	10.25	9.72625	8.24513	9.59324	9.58531	9.39409	9.10194	9.62076	9.43752	9.97926	11.0076	10.4647	11.6759	9.53114	10.4487	10.1456	10.3481	10.4432	11.0951	11.1999	10.7454	9.83531	11.0084	10.7971	10.7169	11.097	11.0446	10.6706	10.9908	9.799
MATN3	7.89183	7.9042	7.88778	8.51514	7.92735	8.71761	9.41234	8.13049	8.15784	8.20756	8.40079	7.99371	8.17621	10.7023	8.73025	10.6905	8.97493	8.95003	9.567	8.99503	8.07561	7.99144	9.25979	9.63582	8.52629	7.95607	7.90897	9.06016	8.01543	9.17247	8.63465	9.8306	8.00278	8.532	8.62371	9.43741	8.33616
MCM7	9.27028	9.27727	10.272	9.74224	9.15195	9.1082	10.3577	10.1909	9.31122	8.20649	8.69722	8.74389	8.81013	8.74528	10.4839	8.48997	9.50451	9.47267	9.92737	9.59457	9.63798	9.38731	8.83783	9.02209	9.5131	9.06853	9.2435	9.88131	9.05774	9.2562	9.33151	8.89476	10.3798	9.34407	9.36246	9.80334	9.72365
MEST	8.27642	7.90227	8.76948	9.56347	8.45081	9.76574	7.96825	7.95063	7.85612	8.56167	7.87077	7.85232	7.9241	8.78779	8.39226	7.94292	7.87591	8.31829	7.93663	7.97115	8.04757	7.91104	8.92268	8.36503	8.54487	8.13856	8.54042	9.09755	8.18888	8.67381	8.59711	8.68396	8.04326	8.40205	9.28048	9.40119	8.46546
MFAP5	11.2253	9.33248	8.22674	11.7223	12.7089	11.6447	10.9908	11.9038	11.0059	9.4547	14.2707	8.24049	8.45296	10.1615	12.0053	13.9441	11.1286	12.1102	12.7255	13.9584	10.2106	11.9195	12.6855	12.422	9.31593	9.04674	8.04398	14.0989	11.4694	12.9606	12.1412	13.3584	11.9895	13.1882	10.7861	10.5517	13.699
MGP	8.90466	8.78878	8.27419	10.3551	8.3336	8.77993	8.99577	9.11873	10.0435	8.62908	9.44058	7.97149	7.91712	9.10531	10.8939	11.4191	11.4289	11.804	10.7275	9.77097	12.266	9.56792	11.5357	12.9626	11.3258	10.5351	12.1082	12.0995	10.6339	12.0907	11.4877	13.2046	10.4327	10.1544	10.892	11.058	11.946
MMP1	10.607	11.2253	7.9544	8.35152	8.12898	8.41567	9.62761	12.799	12.5327	7.98482	7.91483	7.88448	8.06748	8.75239	7.98363	7.95346	8.22447	9.01803	8.42823	11.2401	8.79077	10.2659	8.13149	7.96784	8.08306	8.2579	8.07848	8.14231	8.87562	8.58625	9.13598	7.94774	8.4875	9.497	8.91176	8.26558	11.5596
MMP14	8.68827	8.06381	7.94865	8.41571	7.93958	9.55954	9.43404	9.29245	8.5147	8.16208	7.88562	8.102	7.97822	8.41731	8.09583	7.91233	8.46684	8.13157	8.53005	8.77221	8.39385	8.05664	8.6489	7.95641	7.96585	7.96209	7.92593	8.18427	8.097	7.95171	7.96988	8.71584	8.14044	8.06889	7.98034	8.22428	8.01613
MMP2	9.96328	8.39866	7.95813	9.21835	10.5156	9.84606	14.2358	10.5937	10.0926	9.38571	8.8757	9.90421	9.83971	12.0887	11.3874	11.8059	9.57584	10.2404	10.3417	10.2039	11.7092	9.42562	12.0415	10.5692	9.4653	9.65302	9.65748	10.4621	8.12894	9.27886	9.37888	12.6941	9.64482	10.3751	10.7918	11.0102	11.141
MMP3	7.88794	7.86431	7.90811	7.89292	10.6547	7.96433	7.90916	7.9201	8.86093	9.00546	7.93255	8.17197	7.94914	9.00947	13.6807	9.20634	11.4378	9.26497	10.8536	8.05096	8.91685	8.02984	10.7983	11.4808	8.5637	8.04972	10.097	12.2324	7.92276	10.0703	8.93122	12.2053	11.0138	11.5304	9.09555	9.29461	10.2312
MSX1	7.94939	10.1511	10.0895	13.2587	10.4929	14.0804	10.7275	11.5966	11.508	12.8703	11.2296	12.5804	12.8093	13.8419	13.5558	12.0267	13.154	13.4889	12.3633	13.399	12.7475	12.6871	12.6648	11.6226	13.5405	13.4156	13.4428	12.3488	13.4934	13.5861	13.1175	12.9963	12.6131	13.1708	14.016	12.4012	13.3693
MXRA5	7.87454	10.3678	9.52183	13.886	8.28293	11.4201	10.3032	11.8886	11.3289	8.42038	11.3292	11.9205	11.4328	13.197	11.4598	13.4113	13.2587	14.1283	13.6478	14.082	13.426	13.3661	12.0479	13.3319	14.1265	14.3599	14.2386	14.0006	13.938	13.5579	14.1924	12.6355	14.3567	14.3146	13.9526	14.2407	13.7708
MYL9	8.54145	8.59963	8.58445	10.4801	9.98613	10.693	8.97483	11.2682	9.23571	11.955	10.6872	12.1822	11.7786	9.39982	11.9059	12.3572	12.6053	10.8574	10.9356	11.2982	12.9721	12.1294	10.6504	11.3595	12.2063	11.8647	10.1071	11.7278	12.1237	10.1638	11.5336	11.2313	11.7475	11.0779	12.1769	10.32	11.9667
MYLK	9.35141	9.73393	8.0371	9.7634	8.75789	7.9299	8.47909	7.99678	8.89922	8.35542	8.74629	8.83948	8.76572	8.36782	8.37506	8.12338	8.632	8.01524	8.34675	8.44599	8.77867	9.15984	8.22897	8.11657	8.99637	9.09219	8.97189	8.45116	8.75522	9.74456	8.64071	8.23232	8.6103	8.92036	8.48951	8.28641	8.95043
NID2	7.8897	8.83908	9.92308	10.3702	8.28293	8.84823	7.86327	8.76058	13.102	8.16208	9.51018	8.75319	8.7874	9.89955	10.7714	8.56528	10.1547	9.52434	11.9087	8.41204	8.93707	10.1152	11.168	8.07635	10.1667	10.2887	10.5742	8.09102	10.8686	10.3509	10.6352	7.90774	10.7793	10.4933	11.0251	10.975	10.2357
NNMT	9.47734	9.91589	12.5942	11.9323	10.5884	10.9879	8.14639	14.1734	14.3412	8.7776	10.4499	9.64429	9.46895	9.41962	8.35479	13.2001	11.0633	9.74287	9.28795	12.2245	7.92414	9.51876	8.19178	8.13109	9.29758	9.16889	9.43654	8.30535	10.4101	10.9797	9.41015	9.02032	9.54238	8.92164	10.1406	11.1846	9.3067
NOTCH2	7.8963	8.23665	8.89247	10.0192	8.38123	7.98678	7.85853	7.8837	7.87794	7.88769	7.86447	7.8969	7.87035	8.60156	7.87578	7.86458	7.94644	8.15155	9.62086	7.95361	8.3467	8.72069	8.06692	7.87542	8.06354	8.91724	8.52479	7.87755	9.3572	7.92344	9.29967	7.86855	8.62469	8.76326	8.71001	8.54663	9.0378
NT5E	10.2008	11.034	9.12917	9.92508	8.02309	8.56581	7.8998	7.85139	9.15918	7.86396	11.5706	9.32307	9.68776	7.8667	7.83548	8.06761	7.87135	7.88915	7.84862	7.92818	8.94938	8.89392	9.17282	9.67588	7.84815	9.03767	9.01615	12.0677	8.65829	10.5421	8.97681	10.8788	8.51087	7.90052	7.86047	10.8647	9.26973
NTM	7.93152	8.11191	8.04176	8.22238	10.6214	7.87858	9.64405	8.12265	8.71068	7.89649	8.97406	9.53647	9.44389	7.88738	9.15616	8.43664	7.97831	9.26308	8.32634	7.96015	9.27544	8.38368	8.58609	8.56326	8.28144	8.33124	8.07913	8.04739	9.01809	8.48989	10.0204	7.90664	8.48944	8.70794	8.89136	8.55482	10.6324
OXTR	10.7822	11.23	8.68199	10.0725	10.1695	8.62625	8.90505	8.5352	10.4347	10.1679	11.3954	8.20381	7.88977	9.43594	8.2006	10.2371	8.77527	8.1874	8.28362	9.0913	9.36129	9.05478	8.99329	9.13482	10.0611	9.77545	8.74904	9.04059	8.89097	9.13321	11.1688	8.8276	10.8904	8.75642	8.97767	9.73777	10.293
PCOLCE	10.2849	9.87131	10.5098	9.31033	14.4678	12.1828	14.3599	12.3568	11.3947	13.5592	14.2885	13.3958	13.3391	13.9584	14.3912	14.5094	14.1734	13.3175	14.2939	14.4578	13.2627	13.1144	13.8612	13.938	13.5878	13.5519	13.6694	13.8902	13.3709	14.0858	13.4815	14.4744	14.1299	13.9874	13.4864	13.9167	12.6871
PCOLCE2	9.5922	9.94605	12.358	7.91761	7.88156	8.68876	8.53584	7.9971	9.17366	8.05478	9.32665	10.5126	9.97391	7.90212	10.074	7.87364	8.13087	10.7749	8.08018	8.00338	9.42	11.3357	10.6668	10.2096	8.94556	10.6954	12.2883	7.95843	11.3334	8.06462	10.0753	8.2796	11.1888	9.81792	10.0473	8.66218	9.29995
PDGFRB	13.0273	13.664	9.76411	12.1679	8.33442	8.14689	13.3645	11.7264	10.9082	11.3242	11.2439	11.6828	11.5583	12.9147	11.0659	8.19696	9.31932	13.4381	12.697	13.8018	12.5919	12.5172	11.512	12.2442	12.9743	13.4185	13.7789	12.5378	13.5435	12.9296	12.9933	12.5336	12.9066	13.1403	13.699	13.0643	14.016
PDLIM4	7.84152	7.82474	7.8349	7.81452	7.82748	8.02732	7.86959	7.86716	7.83031	7.87137	7.8713	7.88205	7.81142	7.78627	7.86017	7.85132	7.85113	7.81111	7.87219	7.83352	7.84005	7.82538	7.85043	7.86917	7.83399	8.10149	8.28945	7.82939	8.98747	7.81843	7.89935	7.81238	7.85169	8.98191	7.83571	7.8517	7.81288
PFN2	8.26561	7.85543	8.05113	7.87511	8.59974	8.23784	7.88465	9.18059	7.97419	7.91149	8.14614	8.1666	8.08795	7.95708	9.0337	7.98922	7.88345	8.39405	7.98496	8.05455	7.91623	7.94344	8.08015	7.98134	7.89065	8.25318	8.04892	7.91873	8.02157	7.89879	8.29185	8.11313	8.08442	8.05254	8.37416	7.93152	7.99362
PLAUR	8.17264	8.8498	9.83716	9.86121	8.80242	7.9295	7.91596	7.89198	11.9986	10.2703	9.25582	8.83764	8.60504	9.16653	8.99946	7.91568	8.14306	9.20294	8.6262	8.37034	9.59417	11.1777	9.61644	8.27782	9.90769	9.7699	9.66941	8.89081	9.14462	9.57712	10.8884	8.69283	10.7566	10.3401	9.52132	10.1528	10.3895
PLOD1	12.8235	11.4417	11.4829	11.2418	13.8934	12.4246	13.0113	13.5741	12.8948	13.5832	13.5629	13.7977	14.8927	13.6663	13.8917	14.0312	13.1924	13.5311	13.9423	13.3902	13.818	13.6961	13.628	13.7841	13.8743	13.3825	12.8731	12.9933	13.2375	13.8505	13.3474	14.3276	13.2494	13.4113	13.5649	14.0128	13.1882
PLOD2	9.18865	9.31256	10.5987	10.6951	12.3268	10.886	11.9395	10.5274	11.3877	12.222	10.5675	13.232	13.7049	10.1273	11.9461	13.0574	12.2764	11.9935	10.3554	11.9002	12.221	12.4592	11.8606	12.1886	11.3719	12.785	11.373	12.8607	12.4014	11.6781	12.244	12.2016	12.4383	11.9651	11.8873	12.7144	11.0243
PLOD3	10.2369	10.3422	13.0231	7.90349	8.09276	9.97213	8.32904	10.2373	10.7453	12.5215	10.1714	13.4367	12.6747	10.2491	11.9587	8.29416	13.5057	13.9639	14.038	11.1879	13.455	13.607	13.3107	13.3159	13.8888	13.2029	13.6537	14.161	13.3723	12.9507	13.2131	13.1737	14.4275	14.3444	13.5699	13.0935	13.7424
PMEPA1	8.19987	8.20393	8.36528	7.90121	9.10607	8.30894	8.89984	9.22399	8.0526	8.22434	8.71501	8.09167	8.15606	8.13445	8.04618	8.74791	8.83896	8.08139	8.28287	9.63361	8.43154	8.39889	8.13192	8.11234	8.96231	8.81707	9.26677	9.54472	8.36066	9.04678	9.11036	8.65034	8.81128	8.79789	9.25619	8.96373	9.12611
PMP22	8.98809	9.00177	10.0411	9.89023	8.36759	8.28977	8.65036	9.02012	9.15315	8.17188	9.04916	10.4648	10.0342	8.24579	8.93817	8.51542	9.93337	11.3949	9.18519	9.62965	11.2689	9.96387	8.84809	11.8869	11.2733	10.5078	10.2536	8.76625	9.80393	10.9487	10.6362	9.63857	10.602	9.80577	10.8497	10.5635	10.6107
POSTN	9.3432	9.6701	8.41213	10.4001	13.6353	8.90519	10.7953	8.18792	10.3954	10.5862	10.1166	10.1005	10.4258	9.5774	10.7391	11.7038	9.34065	10.7501	9.65016	8.64123	9.96381	9.93037	10.0407	10.8417	9.86526	10.2954	10.1714	9.79479	9.04638	11.9786	8.83952	10.2279	10.1554	10.4755	11.6353	12.1043	11.0787
PPIB	7.89411	9.52304	11.4417	10.1732	7.8636	10.0451	7.87939	11.3321	9.427	11.3993	8.05524	10.3587	10.8904	9.64289	10.6332	11.2712	12.4146	11.0694	11.4159	13.2454	12.2583	11.1562	11.1004	11.4823	11.0066	11.431	10.6324	12.0436	11.7515	11.5919	10.5953	12.3442	10.8347	11.5629	11.5128	11.6631	10.247
PRRX1	9.05041	8.19112	8.06456	8.39474	9.32646	8.43608	9.0628	9.32828	10.0274	8.51687	11.3469	9.31883	9.48636	9.11066	9.80454	9.53041	8.48638	9.92325	10.3654	9.17728	11.4841	9.97795	10.1089	9.91911	9.92864	11.0609	12.0002	10.3575	11.3686	11.7906	10.615	8.98691	10.6103	10.755	11.6345	11.7857	11.1117
PRSS2	7.81919	8.17494	7.95903	9.18788	7.93958	7.82655	8.22567	9.40882	9.02956	8.74253	9.65827	7.95225	7.8526	8.06181	8.12724	9.34286	8.06906	7.87887	8.2152	7.83527	9.22445	9.27568	7.91571	8.25684	7.94397	7.9427	7.93681	8.66374	8.11036	7.9506	8.00355	7.93301	7.91172	7.95247	8.07228	8.14183	7.93427
PTHLH	10.2448	10.429	7.92007	8.23312	8.20057	8.11009	10.1317	11.4808	7.93843	8.46461	8.20425	9.58444	9.43859	8.59547	8.29659	8.22058	8.56928	7.98106	9.10588	10.2758	8.57066	8.01125	8.84985	8.14688	8.28073	7.95249	8.06683	8.89576	7.91337	8.05473	8.03296	9.89053	8.44666	7.99399	8.05156	8.73233	9.71533
PTX3	7.87454	7.82895	7.88778	7.85968	13.8778	7.84152	12.9948	7.93997	9.08175	10.434	7.82509	7.85303	7.89757	11.2113	9.98154	7.84121	7.87406	9.30624	9.7111	7.90927	8.95584	8.79306	11.0589	9.71472	9.33111	8.76289	9.63519	7.93009	9.48464	7.88525	7.93698	7.89478	10.1072	10.1239	11.0514	10.684	8.82957
PVR	10.1008	10.435	8.84359	9.85022	9.16168	9.80909	9.28604	8.90772	10.0958	8.49291	8.99815	8.41309	8.64106	8.93001	9.47035	8.65785	8.46581	8.49416	9.07863	8.79212	8.32273	8.5338	10.0163	8.84005	8.74776	8.8315	8.79639	8.87316	9.31374	8.5113	9.28083	8.92937	9.30628	9.37893	9.08211	9.68358	8.96691
QSOX1	8.6332	8.97856	8.53978	9.05864	11.4675	8.93071	9.71141	9.30997	13.0971	9.01964	9.91838	8.48724	9.82508	9.27144	10.4987	11.1168	9.18598	8.70162	9.54644	9.27789	9.53917	9.6091	8.78821	8.91167	9.05863	9.2396	8.83792	9.68304	8.92527	9.41483	8.87876	10.5347	8.91201	8.90961	8.84656	9.05399	9.3243
RGS4	9.40231	7.95484	7.97451	9.29028	10.483	10.3208	8.9667	8.13049	8.76924	7.9494	8.71007	9.31033	9.08938	8.56611	8.07837	7.9438	8.37112	8.10188	8.01323	8.45544	9.41219	9.49511	8.34461	8.55693	7.89119	7.96349	8.21238	8.04948	7.93346	8.09276	7.99338	8.19333	8.86588	7.92219	8.14272	8.21093	10.6697
RHOB	9.74351	10.2269	12.7502	7.91025	8.86122	9.18505	9.61124	8.96778	9.03718	10.3128	12.1035	9.41118	9.57898	8.28874	10.3177	9.00165	10.6151	10.6018	8.94181	10.482	9.00723	10.6407	10.5387	10.6186	10.9863	11.0569	10.7818	11.9663	10.8924	8.54465	10.6191	10.0514	9.99736	10.9229	11.1041	10.3549	9.59708
SAT1	10.9086	9.5023	9.61095	9.50423	11.8428	11.4813	11.2737	10.9594	10.8557	11.3855	11.0496	11.6932	11.819	11.0274	11.5786	11.8678	10.6246	11.3601	10.5085	11.0001	11.7457	11.7874	11.4132	11.7157	10.9029	11.299	10.5713	12.2768	10.7575	10.6985	11.5596	11.5529	11.246	11.5398	11.5886	11.5398	11.0685
SCG2	7.9282	7.87131	8.11598	7.85533	7.98566	7.89749	8.88967	11.4229	8.56404	8.52222	7.87738	8.16686	7.88473	8.37116	11.4626	10.1828	9.62861	8.21743	7.92561	13.247	8.42603	8.39562	8.93302	9.10681	9.36625	8.16643	8.35991	12.1923	7.90042	8.18577	8.40453	9.84352	8.71407	9.29568	8.82668	8.61445	8.42926
SDC1	8.66437	8.65337	8.00834	8.64412	10.184	10.5539	9.1319	10.584	9.75778	9.99065	9.17846	8.61291	8.6422	8.99267	8.89071	9.35785	8.87284	8.19923	9.2401	9.83984	8.37217	8.30359	8.60694	8.53705	8.54772	8.23385	8.04255	9.29517	8.22307	8.51088	8.45673	9.16717	8.28887	8.2636	8.39332	8.5392	8.36683
SDC4	9.32853	7.82843	8.08053	7.86366	8.10447	7.88929	7.85768	8.18498	7.86549	11.2983	7.88999	7.85832	7.84773	7.88511	7.87744	7.85132	7.93484	7.84631	7.89221	7.86013	7.8816	7.86902	7.8449	7.9429	7.94636	7.90446	7.91074	7.90347	8.68876	7.84711	7.93937	7.86479	7.87248	7.88652	7.85081	7.85048	7.87279
SERPINE1	8.50183	7.89836	8.04059	9.27246	8.72987	9.18505	8.91983	12.8293	8.00117	8.38787	8.05524	8.12768	7.93427	8.48462	8.51464	8.50312	8.7221	9.05202	8.87767	11.265	8.07413	8.82	8.09576	9.55209	8.70345	8.1068	8.12198	8.9538	8.01707	8.04693	8.21821	7.96632	8.45825	8.05156	9.29818	8.1656	10.0234
SERPINE2	10.2713	11.3644	13.1427	14.4148	12.6681	12.5028	15.2482	15.2608	14.595	15.0523	14.1433	14.5367	14.0917	15.1586	14.834	15.0298	14.8238	15.1191	14.8575	15.302	14.4578	15.1646	14.9288	15.0523	14.9709	14.979	15.2006	15.1335	15.1538	15.0203	14.9709	15.1482	15.2006	15.1138	15.1288	15.3529	15.0857
SERPINH1	9.14325	9.66479	10.513	8.34027	8.48395	9.54184	12.6291	8.33248	9.45349	10.6482	10.1714	10.5817	11.8275	11.2264	11.8124	11.7912	11.1318	11.0465	11.8764	10.7643	9.43089	10.9111	11.4201	10.3322	10.8739	11.1213	10.8272	10.079	11.606	10.0231	10.5037	12.305	10.9088	10.8347	11.7186	11.2703	10.5681
SFRP1	8.50183	8.56547	7.96569	8.39791	8.12898	7.9392	7.89828	7.87622	7.84753	7.87861	7.89159	10.6475	10.5207	12.9158	7.82597	8.07856	8.07572	8.05538	10.449	9.34078	8.02446	7.88472	8.05804	8.01463	7.91884	7.86869	7.91004	7.93009	7.96368	7.89518	7.96516	8.2029	8.03095	9.17853	7.90667	8.02835	7.87089
SFRP4	8.78933	8.76667	8.33832	10.9542	12.2067	10.6847	11.5004	8.66785	11.3267	11.8382	10.5935	9.745	9.6953	10.3304	10.7646	11.1958	10.2131	9.69994	10.3424	8.67093	10.2669	9.67288	11.3592	10.847	8.83736	10.2745	9.67125	13.0829	9.6344	9.97073	9.98339	11.7475	10.7438	10.9636	10.3997	9.96946	10.3541
SGCB	8.656	8.83808	7.97354	8.63069	10.1952	10.9648	10.6007	8.62449	9.71519	8.98273	9.7894	8.14529	8.18785	8.80225	8.55413	9.07559	8.97018	8.12937	9.68787	9.04634	8.38429	8.23796	8.92784	8.88195	8.69112	8.19771	7.99898	9.9264	8.19733	8.67919	8.30637	8.78752	8.2032	8.13679	8.25067	8.43826	8.05921
SGCD	7.87972	7.88804	7.87328	9.35037	7.88319	7.9368	7.87541	8.0053	7.94698	7.87666	7.9168	7.85607	7.86409	8.69612	8.0202	7.86955	7.84522	7.88612	7.95394	7.97692	8.87401	8.11621	8.35702	7.87656	8.60441	8.16456	8.67344	7.86949	9.01843	9.03724	8.20545	8.4806	8.54933	8.78957	8.94706	8.65364	8.45806
SGCG	8.1132	7.99828	7.86222	7.93054	7.92735	9.78872	8.76461	14.3828	7.90554	8.28432	8.80927	7.91915	7.93767	9.04962	9.54172	7.89553	8.20484	7.92608	9.17532	12.0053	8.03379	7.94511	10.1633	7.89828	8.47758	7.89624	10.8982	7.90207	9.44195	7.91095	8.15177	7.99359	7.87925	9.04687	7.93758	7.92472	7.89857
SLC6A8	8.71056	8.30736	9.55468	7.96175	7.99592	8.05762	9.06955	9.25617	8.02879	8.78696	9.04528	9.98415	9.47727	8.23841	8.23152	7.94838	8.65698	8.40904	8.84081	8.27344	8.16005	7.98643	8.30096	8.30993	8.89181	8.05251	8.85226	9.18083	7.97693	8.07511	8.0419	8.45152	9.1868	8.03455	9.25536	9.91483	8.67641
SLIT2	8.13444	9.04557	8.10764	9.40505	7.92007	8.0127	9.5676	8.71652	8.93251	10.7604	10.3978	11.9129	11.2374	12.4318	8.16885	8.89322	8.84638	12.7546	10.3047	9.80461	10.9624	10.4401	8.76722	11.3723	9.67901	11.0399	13.2131	9.72174	12.7758	10.7244	11.0506	11.1994	11.0202	11.4365	12.7559	10.5655	11.4195
SLIT3	9.7364	7.92888	7.837	7.90774	8.64238	13.0537	7.89086	7.86055	8.52649	7.82138	8.69379	9.34897	9.3866	7.92863	9.09627	8.00579	7.87078	7.8604	7.85388	9.40684	7.87808	9.96614	7.83051	7.85872	11.1004	9.39891	10.6457	8.72157	10.3093	10.4885	8.29165	11.145	9.96727	9.68676	10.0231	9.98059	9.42302
SNAI2	8.7213	9.26026	9.74684	10.6229	8.73821	11.2399	10.0419	9.28055	10.1598	12.097	10.5111	11.0515	10.8846	10.1877	11.3903	10.7195	11.5299	12.038	11.6266	10.5059	11.9908	11.3897	12.0154	9.28993	11.1973	12.5304	12.5768	11.623	12.2712	11.4054	11.7298	12.0781	12.8501	12.171	12.7994	12.184	12.0646
SNTB1	7.903	8.17371	8.48117	8.02329	7.85285	7.90426	11.4667	7.87401	9.05313	10.6985	7.95797	9.76083	9.93992	10.9652	11.0077	10.8443	9.62725	10.5448	11.5247	9.5566	12.0765	12.1904	11.5522	10.8129	11.0807	11.7869	10.0831	7.91079	11.1588	11.2064	12.1077	8.175	10.9139	11.0664	12.4168	11.2035	12.2849
SPARC	7.84152	8.09816	7.9653	7.88563	8.26124	7.86812	7.87939	8.11564	9.90709	11.2918	10.2454	9.04788	8.39899	11.8033	9.69183	8.07856	7.84521	10.1259	10.0593	8.94682	7.8848	10.3082	9.873	11.0131	10.7645	11.8341	12.2493	8.15273	10.8452	11.5217	10.8994	10.3254	10.7915	10.9843	11.3679	9.79342	10.5098
SPOCK1	10.1728	9.31827	11.1075	8.61502	9.74726	7.97889	8.26722	8.3182	8.52649	7.94423	9.20658	7.93467	7.81751	8.20522	8.56995	7.90212	8.56898	10.2746	8.7263	8.22486	8.89709	9.22431	8.17062	8.14143	7.91884	10.4528	8.75313	8.34646	8.67994	8.07328	10.715	8.13687	10.028	9.92222	8.17391	9.45164	11.0959
SPP1	10.2142	11.5671	8.67479	13.223	12.108	10.288	14.4616	12.2687	12.4855	13.3578	11.821	13.4444	13.2701	14.0239	11.7742	13.1969	13.174	11.8026	11.5766	14.2509	12.9387	12.6543	12.1806	12.7586	11.5925	13.3551	12.3338	9.50636	13.473	9.45983	11.8311	10.2196	11.5662	12.3434	11.3407	12.818	12.1302
TAGLN	8.82784	8.6192	8.6174	9.19422	10.0309	9.79729	9.15032	9.38145	9.22968	9.20682	10.1062	10.3428	10.2047	10.241	10.2966	10.5498	9.99676	9.98643	10.0413	10.097	9.76675	9.79362	10.1693	10.0627	9.69958	9.91119	9.95807	10.2494	9.84742	9.7372	9.87104	10.0763	10.0986	9.84734	10.722	9.82285	10.3851
TFPI2	7.87778	7.87891	8.02506	9.4492	7.98566	8.14689	7.89086	7.88401	7.84753	7.90246	7.89159	8.08735	7.93427	8.77445	7.90896	7.97842	7.88912	7.90895	7.89617	7.87744	7.96043	7.91698	8.59315	7.88246	7.92518	8.14044	7.92239	7.82463	7.96785	8.30211	7.95883	7.94774	7.93581	7.89008	7.99525	7.96917	7.90105
TGFB1	7.96013	7.8454	7.85807	7.90141	7.9678	7.88567	8.03036	7.9201	7.85125	8.1536	9.20658	9.7416	9.67049	7.8889	7.89429	8.00579	9.65187	7.88313	7.89863	7.90736	9.55086	7.79726	7.90781	7.86917	7.86088	9.70258	7.85714	7.90081	7.87583	7.95711	7.85628	7.88429	9.02588	8.95481	7.90835	8.16719	7.86075
TGFBI	14.4092	10.585	10.7676	9.82467	12.5303	11.7846	10.9418	13.6921	11.758	12.7714	12.392	13.6577	13.938	12.1258	14.2463	13.2986	13.51	12.9004	13.6256	13.607	13.7146	12.9779	13.9918	13.1676	13.8412	13.8323	13.9066	12.6372	13.3661	14.1177	13.5962	13.8792	14.0831	13.5291	13.9461	14.1283	13.6435
TGFBR3	9.40231	8.17106	9.10773	10.1705	7.91061	7.88246	9.11572	7.88004	8.13935	8.11085	7.88713	8.56671	8.69864	8.20522	7.92593	8.75605	10.5949	9.05364	8.36421	9.3931	8.78026	7.89425	8.59315	9.54574	8.21153	9.23512	9.5276	11.7523	9.58406	9.16139	8.80058	9.69426	8.68941	9.05674	8.8902	8.16288	9.19375
TGM2	10.0307	10.2547	9.18581	8.3419	8.98509	8.68602	10.2066	9.37023	9.88	10.0338	8.86543	10.2797	11.6043	8.9436	8.97844	9.36785	9.88746	9.85815	8.2777	10.6388	9.93225	9.79216	9.40244	10.0745	9.07707	9.97721	8.56145	8.88583	9.49139	8.3592	9.46211	9.83402	9.09548	10.0421	9.31416	9.14663	10.5608
THBS1	7.83423	7.88094	7.90177	7.85424	7.89246	7.86036	7.86041	7.8925	7.86639	7.89808	7.93916	7.86408	7.84773	7.88396	7.84007	7.8709	10.3995	7.8604	7.82831	7.87129	7.86833	9.23764	7.85126	7.86629	7.98108	8.75562	8.48952	7.89412	9.00683	8.86865	8.80106	7.90774	8.71948	9.0706	9.34217	9.49526	9.43122
THBS2	12.0937	14.148	8.44431	13.2174	13.1708	9.18505	9.73823	10.0554	11.0151	12.1781	11.2542	12.4168	11.3281	10.1553	11.8623	12.7821	10.1068	8.19398	13.9214	10.5458	13.5017	12.6634	13.0313	13.381	11.9681	12.8321	14.6204	10.9032	11.5038	13.6547	12.9718	13.9355	13.3825	12.1568	13.1221	14.161	13.2157
THY1	7.93193	8.10899	8.23487	7.92596	7.94968	8.36657	7.91112	7.92803	8.93251	7.92349	8.47704	9.19114	9.08412	10.4834	7.86939	10.7918	7.94575	10.5998	8.89471	9.40055	9.06466	9.73407	7.89044	9.66857	10.8555	9.94729	11.5217	12.4081	10.6922	9.87567	11.0777	10.3526	10.8288	11.7933	10.6717	10.1639	11.3572
TIMP1	11.3868	12.5891	14.2833	14.4612	12.7669	12.4037	14.6156	13.3303	11.9604	14.5052	13.7657	14.7746	14.9288	14.6966	14.6692	14.1509	14.7228	14.4901	14.5725	14.7142	14.516	14.5805	14.6795	14.5783	14.6733	14.7883	14.3444	14.9099	14.6866	14.5225	14.6899	14.4612	14.8521	14.692	14.5725	14.7082	14.7519
TIMP3	7.8614	7.88162	8.09226	7.86573	8.20075	9.95191	7.84376	8.11564	7.83464	7.84401	11.7687	10.5985	10.2361	7.86549	7.91295	13.247	7.95095	9.42615	7.85629	7.86799	7.86093	7.88119	9.05044	10.6018	8.9983	10.5897	10.3212	7.97956	10.6891	8.77201	9.00174	7.87575	7.92389	9.48659	10.2811	10.7312	11.4808
TNC	8.5614	8.55733	8.09153	8.88035	9.23323	11.9251	10.4063	10.5146	10.755	11.4547	10.9641	9.91198	10.0946	11.2588	11.0857	9.74205	11.2338	10.4154	10.6011	11.5132	11.0806	8.58904	10.7477	9.91087	11.1042	11.15	10.7292	10.2072	10.8471	11.7746	11.0648	10.4926	9.98051	10.2253	9.91489	9.92482	9.5939
TNFAIP3	7.87622	7.84673	8.01879	7.9362	9.09657	7.89124	8.72013	8.07474	8.66719	8.48536	8.2218	7.94724	7.99144	7.89617	8.48126	8.27496	8.24037	7.9684	8.22786	8.72166	8.06663	8.04737	7.97039	8.06689	8.35428	7.88083	8.13526	8.51864	7.93804	7.94968	8.63995	7.87451	7.95099	7.93399	9.05284	7.92649	8.04604
TNFRSF11B	7.84946	7.87657	7.89301	11.8059	7.8636	7.87583	7.856	8.12344	7.85745	7.89942	7.84753	11.8285	11.3998	12.4543	7.95069	7.89144	8.18782	9.81409	10.2784	9.62512	9.77835	9.76745	7.8874	10.6366	11.0443	8.08887	8.65522	7.91988	7.85385	8.6207	8.23781	7.88303	8.96795	7.90384	9.78575	10.3216	7.94647
TNFRSF12A	7.94012	8.84359	9.05421	7.87279	7.87006	9.34525	12.3875	7.80696	8.38549	10.4003	8.18616	10.8343	10.4717	9.64457	10.2279	11.0443	8.10968	11.1869	11.9031	8.02678	10.5985	9.16596	10.8094	11.2755	10.119	9.85924	8.46287	11.6871	9.92988	10.0883	10.9082	9.99318	10.2219	9.61004	9.5718	9.95544	11.151
TPM1	8.654	8.39215	8.95888	8.95176	9.63282	8.71131	8.20797	10.7066	8.74003	9.6033	9.72744	9.12888	8.92837	9.42348	9.79373	10.5017	9.72376	8.9334	11.3757	12.1	11.1784	9.60706	10.073	9.36669	9.14959	9.95795	9.78982	8.31996	9.47633	9.69372	10.2103	9.32804	9.22547	8.84973	10.0367	9.23028	10.3139
TPM2	11.044	11.8045	12.9521	12.4843	12.856	11.8189	10.3596	10.5059	11.9112	12.2205	13.4338	13.6979	12.8306	11.9585	13.3179	12.3738	13.5301	14.4007	11.3904	11.894	13.6116	13.1496	14.0232	14.876	13.5449	13.6857	13.9816	12.7402	14.5444	13.3718	13.6516	14.1055	14.3666	14.2902	13.5606	13.0857	13.7786
TPM4	8.90366	8.67797	8.35778	9.69494	7.93542	8.59638	9.97812	10.1636	9.49246	8.28432	8.40079	8.309	8.03555	9.55266	7.8645	10.4357	7.91039	8.82985	8.93237	8.24692	8.55357	8.5968	9.05763	9.28508	9.39047	8.49094	8.19235	8.13687	8.16234	8.18702	8.65539	9.67276	8.4511	8.33539	8.33384	8.01125	8.2816
VCAM1	8.11556	8.51728	8.66978	8.0809	9.29711	10.9709	11.6705	11.6558	9.16673	10.0603	8.99608	10.4392	10.3745	11.1019	8.75428	10.5186	10.2501	10.1163	10.6742	11.4219	10.6001	10.1852	8.88008	9.25581	10.1477	11.5261	10.4675	10.4205	10.2861	9.71229	10.6502	9.8091	9.91271	10.4985	10.9718	10.5636	10.4218
VCAN	7.91698	8.13711	8.01585	13.7758	8.26124	7.91593	8.11389	8.08389	9.57514	7.98914	10.8498	7.86874	7.90388	7.94723	9.76765	12.5294	11.5304	11.1819	7.91806	10.2649	8.82901	10.3003	10.2839	7.89181	12.3366	12.0319	14.2407	9.50483	11.6985	12.2883	10.1877	12.053	10.133	12.4853	13.0028	11.8807	11.2536
VEGFA	9.62859	10.5244	8.68067	10.6589	8.65529	8.13944	7.94043	7.9562	8.56345	8.62729	8.10517	8.72398	8.46533	8.16323	9.70961	10.1356	7.97515	9.42375	8.94024	8.06525	9.20014	10.1348	8.51719	9.15013	8.50801	9.34909	8.36417	7.93788	9.37472	8.63476	9.82346	8.49731	11.5343	9.30558	8.40587	8.86272	8.37867
VEGFC	7.92449	8.39562	9.33843	9.48567	7.89246	8.90279	10.2851	7.97202	8.2006	7.88094	7.8551	9.40357	8.99318	7.90042	7.94474	11.9335	8.06181	9.72679	7.85291	7.90387	7.86762	7.95193	8.93681	7.87411	8.14199	8.90782	8.64764	7.9477	8.15473	7.8713	7.96714	7.89175	8.78387	7.92454	8.18384	8.10889	9.27246
VIM	10.1871	10.7026	12.9881	10.9293	9.67389	11.2995	11.9598	10.9426	11.1014	12.344	12.1791	12.9084	13.0785	13.1401	12.5099	13.0462	13.2439	12.9479	13.3231	12.5958	12.9553	12.862	13.548	13.3051	13.4561	13.0586	12.9928	13.6677	13.3526	13.0543	12.633	13.9755	12.8068	13.0745	13.5265	13.2804	12.5149
WIPF1	9.06987	9.79187	7.90825	8.03578	7.98134	7.96422	8.02704	10.6183	8.34892	7.96195	7.92689	7.87432	7.85212	7.95836	7.91761	9.09596	7.97681	8.0627	8.02861	9.50617	8.0164	8.05459	7.89938	7.95095	8.74686	8.02742	7.92639	8.32947	7.99519	8.27221	8.17547	7.88561	8.14172	7.97712	8.05054	8.95094	7.90108
WNT5A	8.50183	8.55357	9.57474	10.6043	8.36197	8.2233	7.88803	11.5139	13.5493	11.7103	9.03085	7.86457	7.87695	11.2341	9.53883	10.764	8.31795	8.07566	9.66313	13.7944	9.04509	7.84492	10.5085	9.78098	10.7307	9.413	8.69742	7.93009	8.02058	8.72467	9.70349	10.4844	9.72065	7.8782	9.21483	9.39537	9.51532
NAME	GSM954810	GSM954822	GSM954821	GSM954820	GSM954797	GSM954798	GSM954803	GSM954799	GSM954800	GSM954804	GSM954818	GSM954812	GSM954809	GSM954816	GSM954819	GSM954790	GSM954813	GSM954811	GSM954801	GSM954796	GSM954823	GSM954808	GSM954814	GSM954826	GSM954791	GSM954793	GSM954806	GSM954795	GSM954815	GSM954817	GSM954802	GSM954794	GSM954792	GSM954824	GSM954805	GSM954825	GSM954807
ImmuneScore	-4.05432	-1.36824	-1.09373	-0.80816	-0.78609	-0.671812	-0.523811	-0.50172	-0.407752	-0.315885	-0.296998	-0.254155	-0.231212	-0.175332	-0.111562	-0.106912	-0.102281	-0.0964043	-0.0767776	-0.0506821	0.0353886	0.115019	0.142559	0.178997	0.328304	0.437543	0.484668	0.569705	0.592519	0.613481	0.629123	0.728187	0.859729	1.0736	1.64431	1.67113	1.92958
Sample	GSM954810	GSM954822	GSM954821	GSM954820	GSM954797	GSM954798	GSM954803	GSM954799	GSM954800	GSM954804	GSM954818	GSM954812	GSM954809	GSM954816	GSM954819	GSM954790	GSM954813	GSM954811	GSM954801	GSM954796	GSM954823	GSM954808	GSM954814	GSM954826	GSM954791	GSM954793	GSM954806	GSM954795	GSM954815	GSM954817	GSM954802	GSM954794	GSM954792	GSM954824	GSM954805	GSM954825	GSM954807
ADAM8	8.14342	7.87137	7.86681	7.86367	7.86228	7.88312	7.8968	7.8911	7.87861	7.8832	7.84792	7.86013	7.94012	7.92149	7.91439	7.86226	7.85288	8.15839	7.85448	8.28293	7.89143	7.89183	7.8685	7.89122	9.6462	7.87454	7.82463	7.88246	7.87695	9.03213	7.846	7.85917	7.8224	7.84943	7.97251	9.63731	8.53085
ADCY7	8.30316	8.9879	7.95167	9.02408	9.7192	8.14194	8.86945	9.35251	9.77733	8.80781	7.95812	9.09867	9.39211	8.63431	8.32834	9.22121	8.14454	8.82691	8.63268	10.6862	9.33621	8.02879	10.1518	9.70294	8.21368	10.1101	10.0297	8.23338	8.25258	8.06993	8.50923	9.45925	8.13348	8.05217	8.2225	8.16566	8.09576
ALOX5AP	8.06798	9.73086	7.92818	7.86902	7.81843	10.0036	7.87744	7.89359	7.84505	9.37426	7.90774	8.0344	7.84287	7.85043	9.07381	7.88094	9.83114	7.86997	10.4282	7.86762	7.85981	7.90878	7.98272	7.84816	10.4506	7.9392	7.88976	9.10078	8.51555	9.72768	8.89523	7.91233	9.92698	10.8405	11.7125	12.1493	10.8972
AOAH	7.96254	8.22788	9.44553	8.57293	9.7441	8.09578	8.73025	9.3552	9.53573	8.86492	8.98627	9.24888	14.0364	8.55611	8.5282	8.88309	8.20153	8.92655	8.95085	9.09657	9.20033	10.0392	9.41234	9.15245	8.8492	10.664	9.76238	8.12917	9.15283	8.43049	9.13133	9.33535	8.68425	8.9708	8.24328	8.15736	9.2923
ARHGAP15	7.93827	8.08952	11.9819	9.37514	8.85948	8.58483	8.49932	8.43683	8.11564	8.48905	7.86479	8.06769	11.0986	7.93958	8.23815	8.75498	8.06193	7.94723	8.0782	9.24339	8.87709	9.91553	9.91504	7.9067	7.9645	7.99936	9.81134	8.07097	8.69314	8.65328	8.97978	9.16218	7.90306	8.19747	8.97365	9.16352	9.50239
ARHGDIB	10.3901	14.8433	10.8647	14.3599	14.5405	14.648	12.9017	14.6115	12.6101	14.5544	14.2763	15.1834	15.2955	14.7275	14.5074	13.8505	14.8521	14.7275	15.0999	12.308	14.6204	11.5756	14.7519	14.4829	14.89	11.9051	15.0259	14.8959	14.0063	15.1095	14.7323	14.2662	15.0203	15.1138	15.1953	15.0081	15.0857
ARHGEF6	8.38412	11.6042	8.77445	11.8595	8.61116	11.3772	10.8695	10.1592	11.8232	11.565	11.0055	13.8226	7.94012	11.3521	11.3814	11.6871	11.0465	12.13	11.9811	7.85979	10.6568	9.93589	7.90916	7.86041	11.943	9.05769	8.12549	12.1961	11.0642	12.1102	10.5442	11.7638	10.9685	11.1593	13.0169	12.2271	11.9681
BCL2A1	8.04028	8.52534	8.58238	8.53931	9.37578	7.97639	8.82925	8.77672	9.62773	8.78288	9.41069	9.84298	9.57338	8.8615	8.5744	8.79765	8.27098	9.50108	8.68868	9.28677	9.56314	9.45349	10.8206	9.39424	8.16468	9.78872	8.67329	8.27424	8.36535	8.23011	8.20938	9.34286	8.10798	8.10036	8.29457	8.20341	8.1363
BIN2	7.90877	7.95299	7.87825	7.90024	7.85126	8.04414	9.13489	8.11529	8.02705	7.92144	7.8234	7.89405	7.8277	9.14889	8.06088	9.55834	7.97197	9.44995	7.87753	7.83153	8.13087	8.02879	12.3062	9.85136	7.97913	7.85814	7.86889	8.77364	7.98434	7.92233	8.41285	7.83813	7.99703	8.10935	8.12794	8.27312	8.41889
CASP1	8.59771	8.11503	8.25645	7.87864	8.04262	8.47376	7.90243	7.90786	7.95193	7.92217	7.97633	7.95123	7.88737	7.88054	7.92792	7.86629	8.27173	7.8664	8.69776	7.9969	8.78795	8.1683	7.90275	8.43662	7.89556	8.80536	7.89446	8.27244	8.00365	8.49321	8.1508	7.90216	8.36597	8.55645	8.42957	8.53522	8.40649
CCDC69	7.96395	8.61189	8.21054	8.30727	9.57913	8.01559	8.88976	9.03743	9.69045	9.23309	9.76667	9.09867	8.78965	8.98879	8.34727	9.16535	8.16975	9.03866	8.81164	10.6282	9.87731	9.64085	9.90445	8.9868	8.53485	10.8315	10.4119	8.53255	8.05998	8.3435	8.21783	9.68245	8.26276	8.17521	8.6692	8.35664	8.38181
CCL5	8.61994	9.92592	9.31331	10.9928	10.6551	10.0241	11.8218	9.52952	10.9651	11.4589	10.3896	11.0805	11.3896	11.5246	11.9005	10.6095	10.6988	10.3618	10.6197	10.1411	10.4518	9.77632	14.1422	11.1008	12.0747	10.042	11.7838	11.4079	11.5475	10.2252	11.6892	10.8613	11.6017	11.3449	11.4955	11.1946	12.402
CCR7	7.82612	7.86513	7.8655	7.88851	7.88562	8.94239	7.87009	8.04421	7.87622	7.83647	7.93593	7.86013	7.85985	7.87746	8.2953	7.87632	7.92819	7.83042	7.86088	7.96103	7.90279	7.96191	7.85937	12.0927	7.90501	7.87454	7.91442	7.85828	7.83596	7.9645	7.82463	7.87222	8.88192	9.65576	10.2545	9.47734	10.2341
CD2	8.09923	8.02628	9.03809	7.91699	8.96927	8.02413	7.94266	7.99538	7.91542	8.03358	9.1249	7.93644	8.25076	7.87825	8.0403	8.85627	7.88976	7.92142	8.16975	7.90804	7.92064	8.19223	7.9203	9.54628	7.92233	7.87454	8.21051	7.91079	8.70979	8.09735	8.76156	8.16037	7.99833	7.88687	8.40116	7.9233	9.43504
CD247	7.92521	7.95076	7.92073	10.227	7.99316	8.69567	8.9303	8.05548	8.25896	7.92405	8.9641	8.5943	8.07918	9.43048	8.88925	7.90414	9.52496	8.18182	8.47496	8.63475	8.21058	9.04706	8.30972	8.02517	8.68041	8.25346	10.5796	9.25763	9.25958	8.74721	9.15759	8.13703	9.86941	9.93268	10.0061	9.372	9.52686
CD27	7.9462	8.05448	11.7028	8.19069	8.33925	8.06798	8.85106	9.10716	9.50957	8.03358	8.23376	9.3931	11.3778	8.15397	8.09395	8.15799	8.8133	8.92197	8.34868	8.60842	8.83738	9.497	9.34867	8.76971	8.10569	10.3208	8.07332	9.1254	10.3648	8.06451	9.95886	8.56528	7.97167	9.24693	8.87279	8.87665	8.23927
CD300A	7.86874	7.85208	7.84673	7.87293	7.92007	7.82749	8.01702	7.92005	8.21587	7.92979	7.90774	7.95222	7.89625	7.86566	7.8713	7.87975	8.64309	7.86766	7.92518	7.92333	7.87868	7.85966	7.89386	7.88874	7.88895	8.14689	7.84496	8.65871	8.00704	8.4124	7.91696	7.87667	7.88583	8.06567	7.91948	8.39904	7.92453
CD302	7.86718	7.84216	7.90323	8.39117	7.9378	8.01295	7.9016	8.15239	8.03696	8.76343	9.15004	7.87828	7.93731	7.89873	8.0609	7.91443	7.88934	9.18299	7.90918	8.25056	7.90444	7.86103	7.89178	7.86895	7.86944	10.5849	7.95875	8.32768	8.83003	8.19797	8.77245	7.89387	7.90795	8.104	8.80555	8.41793	8.87358
CD37	8.02671	7.89602	7.91906	7.88808	8.34054	7.88061	8.17745	8.16031	11.4632	7.91593	7.94884	9.92486	8.08387	7.92626	7.89867	8.45333	7.90413	8.05114	8.183	7.92253	7.97821	7.97384	9.00741	8.02306	8.66529	8.78179	7.92215	7.94913	8.15246	7.87367	8.29695	8.43736	7.92488	7.88782	7.8819	7.92272	7.8917
CD3D	7.90997	9.41917	7.98655	7.88183	9.88974	9.60111	8.45188	9.37259	7.87566	9.09881	9.39523	8.21869	7.86041	8.83925	9.08245	10.0537	9.18539	11.8141	9.34902	8.15953	7.88944	8.0539	7.98744	10.2555	9.4492	8.75667	10.3273	9.03909	8.3954	8.83974	8.56551	7.88461	9.62994	9.81787	9.71167	9.65405	10.6323
CD48	7.89659	7.91593	7.95921	7.89156	8.25231	8.61435	7.88934	8.18054	8.25639	7.90231	7.92714	8.0344	8.10259	7.93561	8.5486	7.85044	9.29	7.92364	8.6678	7.89246	8.02391	9.2203	7.91306	8.00956	10.2129	9.34525	8.92647	9.25713	8.99894	8.77456	9.18378	7.90446	8.676	8.99462	8.35632	10.2091	9.91629
CD52	8.07394	8.25057	8.12092	8.18943	8.11036	7.94643	7.91295	8.63163	9.21642	8.51364	8.86275	9.23366	8.7308	8.69695	8.46144	8.81852	8.20614	9.22653	8.41842	9.14835	9.27092	9.89731	9.33577	9.15672	8.02267	11.141	8.30535	8.02665	8.21302	8.14672	8.02065	10.7561	8.08954	8.33786	8.76717	8.20153	8.09181
CD53	8.09283	8.04297	11.1556	8.08061	8.22208	8.23243	9.09468	8.67811	8.6117	8.50803	8.17068	8.67397	10.6612	8.16779	8.24072	8.31892	8.01683	8.40716	8.21822	8.15818	8.47081	7.99039	8.67593	10.1321	8.95657	8.84356	9.48705	9.19181	8.54759	9.61499	8.53133	10.748	8.31335	8.80209	8.74923	9.05271	8.7927
CD69	7.96904	8.25627	8.00609	7.97267	7.99254	7.96834	8.56374	8.82917	8.02529	8.04436	8.01371	8.13878	8.01856	8.01406	7.9711	8.08233	7.96252	9.55486	8.00516	9.12091	8.29511	8.35599	8.58641	10.5476	8.69166	8.03498	8.00876	8.48676	9.21143	8.0123	9.23072	8.14749	8.20921	7.99601	7.92257	7.95479	8.02085
CD74	8.36277	10.0686	11.5816	10.3476	9.89275	10.1894	10.5846	9.6369	10.3931	10.253	10.3498	11.6245	12.0946	11.0238	10.2135	10.456	10.3323	10.2843	10.6026	9.4244	10.2934	10.0672	10.2451	8.30694	10.7516	10.0484	11.2945	10.6207	9.49274	10.578	9.83544	11.0799	10.6027	11.5614	11.5209	10.9637	11.2072
CLEC2B	9.58284	8.75025	9.31718	8.68308	9.71179	8.6503	7.89033	8.43683	8.79192	9.21766	9.15585	7.92534	9.40231	8.90565	8.74438	9.06327	8.31723	8.39397	8.37769	10.6345	8.47926	12.8235	8.43172	10.9402	8.01729	9.50358	9.23296	7.99779	10.3625	9.25115	10.1004	9.32641	9.4203	10.4027	9.79578	10.1371	9.27827
CLEC4A	8.12979	9.03816	8.00589	9.71392	10.8731	10.1644	9.72955	8.98519	7.88631	10.1575	8.88902	7.92416	8.46951	9.67141	9.37924	10.1843	9.84918	10.4164	8.99559	9.44448	11.6723	8.96559	8.17629	7.91508	11.2247	8.33861	10.4546	10.9015	9.60577	11.057	9.87881	10.7223	10.3883	10.1891	10.4475	10.5622	11.3439
CORO1A	7.8998	7.87097	7.87131	7.93713	7.88405	7.84593	7.87744	7.84261	8.25639	7.87411	8.74446	7.90736	7.87293	7.90904	7.89561	8.17444	7.87525	7.92142	7.85936	7.87132	7.84869	7.86901	8.05885	8.05413	7.89617	7.91259	7.9078	7.89427	7.98434	7.9403	7.88205	8.01908	7.93856	8.59453	8.42245	8.31941	7.86787
CST7	8.00679	8.2632	8.32509	8.37364	9.3464	8.27909	8.80592	8.89979	8.5734	8.4655	9.41234	9.46129	9.23895	8.73025	9.36148	8.43494	8.22447	9.37847	8.33118	10.4929	9.39859	8.98452	9.82687	10.8281	9.20521	9.32317	9.36717	8.16935	8.4049	8.18035	8.0392	9.37144	9.13883	8.97312	8.11771	9.2484	9.19458
CSTA	7.90531	7.90684	7.91884	11.1135	9.04528	11.0328	8.14595	7.90931	7.86396	9.831	10.6217	7.97743	7.89183	9.31982	9.40976	7.90564	10.1473	7.87338	8.91856	7.96103	8.1796	7.97355	11.8365	10.5222	8.00325	9.54184	8.08475	9.07674	10.6248	8.20697	10.5555	9.07894	9.54044	9.64	10.5371	9.58611	9.39625
CTSS	8.24316	9.02247	8.22555	8.50636	8.16272	9.84922	10.5903	11.809	13.5545	10.2133	10.8955	11.9561	7.85613	10.7733	9.64579	8.02984	9.78921	9.88561	10.6049	8.05208	10.9658	12.6791	8.1722	7.8848	10.901	10.536	8.53032	10.8025	12.1798	10.4609	11.1499	12.8617	10.6972	10.8421	10.9738	10.9722	10.901
CYBB	7.88647	7.88838	8.07474	7.9117	7.96778	7.88354	7.94266	7.89488	7.9027	7.92295	7.89771	8.0344	7.98329	7.94695	7.93593	7.8876	7.94315	7.9635	7.9049	8.26124	8.04935	8.46394	8.39655	8.9829	7.91076	8.14689	7.95843	7.93755	7.9135	7.88936	7.93511	7.92803	7.90728	7.92097	7.89181	7.88493	7.93737
DOCK2	8.0193	8.37373	8.19708	9.83885	9.73653	9.37817	10.4516	9.35868	8.36791	8.88037	9.4873	10.3177	10.374	10.1688	8.77139	9.32401	8.38828	9.4424	10.1937	10.9067	9.52349	8.25067	10.7446	9.06303	8.36895	9.08697	10.2419	8.35973	8.16569	9.98172	8.13761	10.0291	9.76615	9.79397	10.7827	10.5325	8.35252
EMP3	12.2181	11.4784	10.0207	11.2924	13.8816	10.8248	11.8623	9.61865	10.6289	13.1844	12.3167	9.87685	10.8213	12.8703	11.0191	9.43392	12.0841	9.58838	9.61179	11.8223	11.8745	10.0369	11.0578	9.17484	11.7078	7.91259	10.745	10.9937	11.2804	9.3685	11.5565	10.0334	10.7248	11.209	11.431	10.8238	11.0202
EVI2B	7.94658	8.7828	8.05504	8.34466	8.8162	8.2168	8.80111	9.37202	8.94452	9.26503	8.80568	8.40277	8.21733	8.70185	8.62074	9.89584	8.59745	9.07732	8.78031	8.14012	8.87393	8.41465	9.62219	8.74533	8.69858	10.4152	9.59709	8.70452	8.27318	9.17019	8.12912	8.07635	8.47044	8.64426	9.28758	9.12358	8.96026
FCER1G	7.90432	9.52005	14.5973	8.83076	9.97526	9.77643	11.9035	8.18054	11.4459	11.1359	7.9027	13.5159	14.8547	12.917	9.22742	13.0658	10.6175	8.81852	9.25647	10.0413	9.49447	9.79292	8.28231	8.33412	11.1237	9.7694	7.97552	12.0927	10.7779	12.1845	11.5642	12.5523	11.4528	11.7288	11.9997	12.4146	11.2802
FGL2	8.03176	8.281	8.72687	8.34812	8.96927	7.97607	8.95771	9.58543	9.34734	8.82659	9.31215	9.97505	9.65682	8.85328	8.75533	9.03194	9.11719	9.3076	10.9336	11.9569	8.9284	9.71852	10.064	9.28884	8.15998	9.82404	9.2084	8.11927	8.14602	8.16211	8.09228	8.80218	8.81406	9.07546	8.18861	8.94812	10.5453
FGR	8.08033	10.2185	8.35478	9.65385	9.92958	9.68121	9.72406	11.0298	10.5967	10.2824	10.2494	11.065	8.3625	10.3166	9.98476	10.6333	10.5331	12.219	10.5082	10.0251	10.4914	9.95094	9.55762	8.5602	11.1474	9.96741	10.2082	10.1259	10.6387	10.3076	10.9698	10.5047	10.9944	11.1075	11.156	10.8186	10.4812
FLI1	7.96224	8.91696	8.37775	9.00842	7.87621	9.08657	9.39349	7.89726	7.87176	9.36604	8.02407	7.99629	7.84413	9.36759	9.17223	9.97231	9.2971	8.02252	10.0434	11.8037	7.95842	10.3609	8.79348	9.74203	8.88619	7.82239	8.1702	8.94812	8.43967	9.38769	8.52654	9.753	8.78777	9.23153	9.05455	8.96814	9.42302
FYB	7.96602	7.97807	7.88972	7.99134	8.72466	7.8758	8.407	8.21948	8.61149	8.43557	8.49691	9.40869	7.91144	8.39463	8.06849	8.26191	7.99593	8.03305	8.2711	7.91788	8.23205	7.8687	8.49588	7.92812	7.97768	7.89283	8.17689	7.99513	8.10724	7.99738	8.32265	8.77049	8.20208	7.90196	8.76355	8.22431	8.26703
GBP1	8.30218	8.42409	9.54817	8.51555	9.10327	8.21575	8.29099	8.78602	7.91407	8.3572	9.03766	8.29507	9.68361	9.25169	8.62304	9.25304	8.21743	9.2357	8.48515	8.13538	8.64948	8.24968	8.57983	8.76714	8.03329	8.55752	9.03996	8.43239	8.32041	8.18272	8.52992	8.90351	8.13756	8.54346	8.94189	8.01518	8.58382
GBP2	9.55182	11.6077	9.46298	13.4069	13.1604	11.7885	13.9406	11.9295	11.5057	12.2863	13.2292	13.5686	14.1897	13.1277	12.6634	13.5357	12.578	12.7396	11.5188	13.5878	13.1427	11.2142	14.3102	10.6475	13.2655	11.1569	12.9567	13.4509	13.7448	13.6039	13.5493	12.5163	12.4611	13.4133	13.9918	13.0488	13.8042
GIMAP4	9.04653	13.3194	10.4384	13.3362	11.3778	13.3661	12.935	13.3462	12.3902	13.3927	13.8363	14.3828	14.4721	13.9183	13.4695	13.7225	12.8992	14.3599	13.3505	12.1332	13.3336	11.5204	14.2535	12.1781	14.0639	12.2101	14.3116	13.8612	14.0037	13.7468	13.7789	14.2724	13.4982	13.8726	13.7387	13.9567	13.9838
GIMAP6	7.9054	7.9343	10.1429	8.15702	8.18538	7.88017	8.08483	8.05076	7.95101	8.06371	7.95293	8.00296	9.86479	8.17314	8.0153	8.06106	7.94845	8.24509	8.00738	7.98044	8.42544	8.22116	8.38266	8.20013	8.39156	8.42555	8.14192	7.95022	7.99883	7.91237	7.93482	8.10814	8.3787	8.2459	7.91742	8.35586	7.93699
GLRX	11.4169	8.83722	9.5972	8.41731	9.46371	10.0408	8.08256	8.29273	7.92803	10.4443	8.70422	8.88712	9.01353	8.58007	9.92841	8.2653	9.96034	9.13032	9.00372	7.96103	11.8821	7.99473	9.31345	14.1638	10.7976	8.84823	8.14744	7.95774	9.59921	10.7895	9.81214	7.91775	9.92768	10.245	10.4558	10.2256	10.9376
GMFG	8.66738	10.6636	10.777	11.5128	11.7391	10.4412	13.2357	11.2768	12.4748	11.5045	12.0403	12.884	13.9355	11.5612	11.8428	11.0443	11.1928	11.473	11.3334	13.2858	11.7532	12.1426	12.6526	10.1497	11.4569	11.2049	12.0175	11.4185	13.4744	11.3613	11.1881	11.5936	10.5256	11.1667	11.3674	11.4124	11.261
GMIP	8.87427	7.91441	8.04685	7.82352	7.80466	8.64369	7.85175	7.86364	10.0977	7.82995	7.84424	7.84756	7.83156	7.89315	7.85806	7.85044	8.65045	7.84919	7.89119	7.9765	7.86557	9.09187	7.81756	11.4528	7.85613	14.0679	7.86156	9.59568	9.1962	8.82935	9.69675	7.83116	8.96073	8.54864	9.30425	7.84063	8.51243
GNLY	7.90806	7.90384	7.90427	7.9099	8.04472	8.08056	7.98942	8.10696	10.0632	7.91157	8.05964	9.42378	8.0353	7.97384	8.03779	7.98094	8.1436	8.39246	8.06882	8.88078	8.15559	7.97663	8.2418	8.00472	8.43564	10.0736	8.02895	8.39754	8.24458	7.93023	8.25947	7.90114	8.19632	8.24013	7.88269	8.36075	8.4622
GPR65	8.22567	9.17372	7.97802	8.69526	8.19455	9.04361	10.4557	9.04213	10.5967	9.63344	10.2632	10.0188	8.76086	10.8036	10.3133	10.3565	9.1468	9.68582	9.18293	8.03664	9.35672	8.1179	10.3119	8.35759	9.81878	11.3715	9.91428	10.2326	9.77105	9.25415	9.01271	10.475	10.0872	10.1513	10.8448	10.2417	10.4511
GZMB	7.82162	7.82559	7.8454	9.59708	7.98728	9.17376	9.51435	7.8345	7.86483	10.2843	10.8924	7.86497	7.85083	10.7435	8.98902	7.85551	9.51562	7.85392	7.98324	7.83474	10.798	8.06758	7.85246	7.82077	9.92222	8.34107	8.08475	9.99604	11.0887	10.1971	10.8809	7.83813	11.0087	10.3606	11.2899	10.0416	11.8697
GZMH	8.23321	7.85979	8.59446	8.7861	9.1383	7.84337	7.96249	7.85806	7.89109	7.85787	7.8539	7.82133	7.86832	7.87989	8.39735	7.91204	7.89246	7.91886	7.85334	9.8072	7.83455	13.6694	13.2685	9.8354	9.3005	8.0127	7.90207	9.43353	10.0686	7.91853	10.1597	7.82543	8.73906	9.39222	9.72401	9.20778	9.68467
GZMK	7.93529	7.89334	8.18957	8.17195	7.91483	7.88798	7.90003	7.981	8.46282	8.17106	7.89937	7.92534	7.85613	7.9111	7.95926	8.07535	7.91255	7.90725	8.84183	9.61924	7.86557	8.42585	8.04913	9.23876	9.49924	9.03155	7.90652	7.95017	9.00947	8.03423	9.08101	8.62245	8.00034	7.89301	7.93698	8.73867	7.93086
HCK	8.15106	10.8635	8.43401	8.17322	9.42858	10.7382	10.0496	8.43683	8.10743	8.67166	8.3435	8.69314	9.04474	8.38294	8.80066	8.20756	9.93352	8.80466	9.87764	9.22035	8.21992	8.43847	9.1814	9.0799	8.00133	9.57596	10.3491	8.11698	9.57313	10.1002	9.70643	9.60178	10.3816	11.2645	11.7028	11.1476	11.0514
HCLS1	8.0917	9.31538	9.77413	8.75313	8.85948	10.5241	9.1121	7.94452	7.9971	7.92718	8.54567	7.93644	14.8316	9.89768	9.63162	10.9808	9.72546	7.98301	8.63501	14.343	7.88479	10.3252	8.28231	8.20402	9.80333	7.90193	8.00021	9.33596	8.15564	11.8796	7.88795	7.92096	10.9537	10.3901	10.8733	11.3504	10.7871
HLA-B	11.2296	11.5814	9.77643	9.43859	8.69379	11.0191	11.6694	9.88305	8.20474	12.2392	11.4922	9.8377	14.1086	12.5303	12.0578	12.3979	9.65661	10.9393	11.984	7.94968	12.999	9.82978	8.67477	7.98665	11.9829	9.34525	12.7805	12.0037	10.9188	12.4761	11.3072	13.5629	11.4274	11.2341	12.7245	11.6691	12.8351
HLA-DMA	8.65964	10.8522	8.88471	11.6676	11.844	9.5542	12.4868	11.8641	11.1083	11.7864	12.3423	12.6487	13.8274	12.6606	11.9265	11.5522	11.3016	11.5778	12.0392	13.301	11.0881	10.5753	13.8323	8.60532	11.4318	11.0974	12.5283	11.7927	13.7468	10.963	12.3547	12.2065	10.8733	12.1485	12.5336	12.1382	11.6027
HLA-DPA1	7.83592	7.81711	7.91562	10.4988	9.7192	10.7739	10.8904	7.86455	8.25639	11.845	10.6672	9.31949	7.86275	7.8592	11.1574	12.7413	10.257	7.82324	11.8124	14.7251	7.81789	10.5392	11.9023	7.86366	11.2962	10.0934	14.2627	11.907	10.617	11.6676	10.8713	13.3883	12.5001	11.6712	13.0266	12.0677	13.1221
HLA-DPB1	7.93484	8.92487	7.8454	7.95171	7.9004	8.06376	7.85037	7.88721	7.84239	7.91875	7.89771	7.89868	7.90559	7.92413	7.95711	7.80703	7.92418	7.89617	7.8635	7.86479	8.00678	9.18543	8.01035	7.8801	7.86088	10.2472	7.92803	7.87808	9.17077	7.9437	8.95186	7.87828	8.27953	8.75661	8.95421	8.64677	8.54392
HLA-DRA	8.39776	11.591	8.93408	10.2129	11.6942	11.6235	10.7999	11.9151	11.0011	11.5637	12.9556	12.1302	9.42708	10.7284	11.5642	10.5885	10.8133	10.1431	12.4501	11.8908	11.9408	10.7449	14.2829	9.09731	12.08	11.9309	13.4548	11.8095	10.5675	11.5283	9.63047	14.1747	12.118	12.4799	13.0045	12.3025	13.0575
HLA-E	11.6246	14.3444	10.2643	14.2069	14.2276	13.5894	12.5317	10.8769	11.85	14.0934	14.197	14.2069	9.98732	13.8412	14.2991	14.1724	13.5741	14.516	14.1509	11.7795	14.343	11.5139	15.2067	13.4428	14.5973	11.8202	14.7994	14.6573	13.8392	14.7115	14.3512	14.4071	14.1989	14.2991	14.5529	14.5505	14.6733
HLA-F	8.05353	9.6588	8.29517	9.1442	9.32086	8.87994	10.3516	10.5015	10.9862	10.0159	9.7726	9.98729	7.97419	9.88466	9.84026	9.66103	9.56259	9.09434	9.69407	8.08142	9.28267	8.68582	8.86924	10.1704	9.69902	9.73253	9.69368	10.6372	9.7435	9.78531	9.59406	10.2843	9.41377	9.58597	9.86241	8.80413	9.56841
HLA-G	7.95025	8.49802	7.93879	8.21327	7.90622	7.96139	7.85392	9.55903	7.8543	8.98812	8.70422	8.13834	7.87935	8.85652	8.69006	9.32768	8.19898	8.13823	8.09748	7.90306	9.40511	7.863	10.159	8.29091	8.35064	7.91259	10.3893	8.38341	10.4717	8.15212	10.4638	9.61523	8.51408	8.03411	8.32378	8.15273	8.20556
IFI30	14.3553	12.0446	10.4206	9.686	7.87367	10.4724	7.8645	7.83144	7.87622	7.95814	8.15081	7.91595	7.91385	8.20875	10.1199	12.1025	9.18779	7.91267	8.20424	8.14172	7.93369	8.74936	7.84631	8.80132	9.7508	8.62625	7.94513	7.95494	7.86303	10.0644	7.99838	7.90212	10.0824	9.82404	9.42901	11.4492	11.6007
IKZF1	7.91233	7.90995	7.91079	8.24224	8.14421	9.35018	10.2232	9.57596	7.97784	9.59921	10.1322	9.84298	7.92449	10.3867	8.80548	10.2672	8.4452	10.9898	10.8652	9.35294	8.66288	8.42585	8.02044	10.2782	9.52391	7.84994	12.2583	8.9147	7.89757	9.6889	7.94674	7.92803	10.0234	9.67901	10.5688	10.2211	10.7352
IL10RA	7.96979	10.2816	8.1547	7.94474	8.02364	8.82195	7.92066	10.5458	8.00542	8.05791	7.98252	8.55434	8.05419	7.9912	8.22609	7.98482	9.86616	13.4285	8.81446	8.10447	8.19657	7.96916	8.65577	8.2252	7.87208	10.444	8.45462	10.0203	7.98434	10.5071	7.90686	7.92437	10.4889	10.4051	10.6102	10.7976	9.14362
IL18RAP	7.94045	7.92504	7.94835	10.4062	7.91255	10.6077	7.86939	12.0319	9.40882	7.89554	7.87451	7.92039	8.42656	8.11577	8.02017	7.86867	7.96293	9.71193	8.06321	8.03657	8.15261	8.0352	9.24007	12.4352	9.27072	8.02732	7.93482	7.91478	7.91094	8.21829	7.89575	7.93165	7.91103	9.50133	7.90303	9.07407	9.39047
IL2RB	7.96875	8.12415	11.3072	8.18702	7.85922	7.97099	8.52425	8.65328	9.88272	8.60906	9.01225	8.8311	11.0906	8.63278	8.2953	8.90537	8.10998	8.63551	8.37056	8.45145	8.76001	7.96916	9.70833	10.04	8.30449	13.3474	8.76752	8.16114	7.85771	8.7724	8.08884	9.37144	8.64582	8.22139	8.20673	8.77041	8.75448
IL2RG	8.00819	7.89429	7.94835	7.93522	7.92595	7.89287	7.8968	7.90931	7.89912	7.94592	7.89478	7.95222	8.1565	8.02515	8.15208	8.05478	7.91112	7.90387	8.0266	7.99592	7.914	7.89826	8.00266	7.88405	7.92454	8.02732	7.9645	7.91004	8.39271	8.50788	8.51819	8.39674	7.93798	8.5747	7.94723	8.01391	9.52832
IL32	8.20984	7.92624	8.26519	8.58385	14.3289	8.88778	9.37093	8.83259	8.48133	9.7773	9.02158	8.1061	10.3992	9.77277	8.70076	9.17767	8.33323	9.5639	8.02581	12.0692	8.17315	10.7441	10.5244	7.95461	8.70023	8.60933	10.0839	9.40371	9.11596	10.6592	9.04624	10.8175	9.24716	9.49573	10.5501	9.43824	9.12582
IL4R	8.78257	10.0951	8.27828	9.17903	8.66061	9.59466	9.82375	9.8314	8.36415	8.99499	9.94716	8.9864	7.9959	10.5073	10.294	9.12284	10.9415	9.33784	9.7581	8.0285	10.8142	10.0832	10.1725	8.97797	8.77788	8.87516	9.71227	9.80269	9.71049	10.7139	9.56146	9.29353	10.3119	10.1198	9.41565	9.9766	8.96595
IL7R	7.87689	7.85489	7.84026	7.87293	7.89159	7.86905	7.90896	7.93	7.92242	7.84946	7.85139	8.15311	7.90559	7.88676	8.64542	8.03536	7.89411	7.90387	7.94174	8.88758	7.87255	8.93251	7.97744	7.86647	7.85884	8.79573	8.15815	11.3979	8.48424	9.72297	8.88615	11.9181	7.87734	7.93033	8.13907	10.0501	10.7499
IRF8	7.96275	9.39297	8.13471	8.2233	9.66537	7.98227	8.99531	9.04185	8.76058	8.86806	8.29238	9.28209	7.94491	8.62121	8.39735	9.2628	8.21361	8.75938	8.63671	8.99405	8.6118	8.28471	9.16908	8.05884	8.25237	9.97213	9.53417	8.29091	9.73851	8.11095	9.56662	9.62512	8.7651	8.02762	8.49475	8.12869	8.05096
ITGA4	8.04926	8.70987	8.10541	8.62278	8.69379	8.05449	8.13188	10.1172	8.44289	9.22134	8.0329	7.89262	8.57327	8.88052	8.83528	8.38787	8.40921	9.67238	9.57788	9.69214	9.64216	8.18516	8.13025	8.23003	8.54677	10.7131	8.93434	8.5241	7.88977	8.25157	8.14664	8.81881	8.28018	8.15854	8.53832	8.30428	8.26193
ITGAL	7.9289	10.6433	8.14531	9.39647	7.91483	9.3432	10.4466	7.93889	8.27225	9.73276	8.18412	7.93905	8.42656	11.0226	10.1286	7.94695	10.7388	8.00692	9.24267	7.89448	11.2284	8.63101	8.73475	8.24023	11.1593	8.50476	8.66374	10.259	9.53369	9.20646	10.0482	8.06761	12.238	12.5846	12.6144	11.4546	12.0712
ITGB2	9.19673	13.5017	9.86033	12.3889	11.2891	13.9144	12.4625	12.9335	10.8748	13.2721	10.269	11.2447	10.7934	13.5607	13.2711	12.7697	13.6243	13.9765	13.4957	11.069	12.4556	11.2246	13.9746	12.2792	14.2297	11.8623	13.357	13.5473	12.4081	13.3628	12.9552	14.3942	14.1125	14.4436	14.5423	14.4678	14.6156
ITK	7.87498	7.93258	7.88639	7.94372	7.90246	8.4763	7.9689	7.95573	7.9971	8.26659	7.98757	8.5947	8.14529	7.90394	8.40175	8.15799	9.41428	7.88274	8.49724	7.82559	8.1796	8.83546	8.23914	7.87764	7.97607	8.12133	8.33683	7.93517	7.98434	9.33758	7.92149	8.05624	7.89559	8.70674	8.12794	10.3577	9.93425
KLRB1	7.83251	7.88446	7.87825	7.88525	7.99565	8.32573	7.87659	7.91303	7.90661	7.87638	8.02407	7.9227	7.903	7.88368	7.8655	7.91385	7.85746	7.8991	7.85269	7.89035	7.88166	8.05232	7.86959	7.86234	7.86088	7.91593	7.93009	7.88892	7.89558	7.83399	7.85979	7.89759	9.10753	8.15162	7.90347	8.47392	7.84747
KLRK1	8.01659	8.30718	8.61477	8.2399	8.71007	7.95069	7.88114	9.00971	11.0029	9.01065	8.93302	8.84337	8.86498	8.57406	8.30217	8.83888	8.11284	9.39781	8.82908	8.48395	8.6065	8.66719	9.78693	8.68297	8.28273	8.59638	9.54417	8.23338	7.90628	7.98939	8.12882	9.29	8.12069	8.04917	8.19265	8.12172	8.11292
LAIR1	9.38219	10.9301	11.2112	11.136	11.6286	10.818	11.4755	11.5997	11.8071	11.5458	11.3623	11.5196	11.3623	11.2715	11.2026	12.01	11.329	11.3728	11.2559	11.5473	11.1405	11.774	12.1006	11.5529	11.0061	11.7498	11.5543	11.0925	11.4127	10.948	11.1054	12.5974	11.102	11.1313	10.9635	11.0568	10.965
LAPTM5	7.93024	7.89836	7.90831	7.94798	7.87028	8.84507	7.95978	8.14384	7.91775	7.90453	9.04044	8.54006	8.04039	8.16867	8.18192	8.10255	9.10937	8.18531	8.39469	8.96706	7.96763	7.84946	8.34514	7.98051	7.92826	7.86297	8.76752	7.92998	7.88473	9.42121	7.89315	9.13745	9.6231	9.30624	8.21618	9.10409	8.98001
LCK	7.93548	8.17236	9.45039	8.14837	8.89381	8.14682	8.62616	9.11345	9.58592	9.21802	8.48636	10.5856	9.15069	8.36272	8.67221	9.4333	8.08346	8.84412	8.63473	8.99357	9.01777	8.7945	9.46759	9.39308	8.47452	10.2259	9.60782	8.18131	7.9751	8.03986	8.05603	8.77136	8.06341	8.13466	8.35586	8.5365	8.25244
LCP2	7.99046	9.77384	8.58831	7.95888	7.92007	8.73708	7.9573	8.01323	7.9201	8.16046	8.14384	7.97181	9.29202	8.97327	9.02881	8.04222	9.34931	9.21812	8.94291	8.45145	10.7561	7.89052	12.9651	7.93994	8.69758	11.7357	7.89412	9.98908	9.20187	9.51532	9.18886	11.2866	9.70628	9.51018	9.85827	9.93502	10.0981
LGALS9	7.91816	8.91713	8.12185	8.08667	8.59835	8.32455	9.2654	8.95643	9.8252	9.56515	9.94165	9.18269	8.31955	8.12615	9.68057	8.55543	8.15448	8.47446	9.47763	9.23468	9.99682	9.92841	9.16283	9.11952	8.7721	10.5111	9.43981	8.77556	8.8435	8.43542	8.8827	8.81053	8.03699	8.26118	9.24523	8.04878	8.04496
LILRB1	8.50258	10.71	10.4943	11.1233	11.0332	10.3333	11.241	11.3589	10.8537	10.7253	12.6155	11.8739	12.2983	11.0584	10.7633	11.0232	10.9681	11.381	11.2377	11.5327	11.2128	11.1711	12.2039	11.678	10.8084	12.3197	12.2386	11.4306	10.9034	11.4824	10.6759	11.799	10.6863	11.6828	11.8338	11.5199	11.3571
LILRB2	8.12877	9.138	7.90137	8.23041	8.04386	9.17357	9.63012	8.2152	7.9971	7.89644	8.2029	7.88537	7.93585	9.65341	8.39266	7.92955	9.74322	7.93857	8.78757	7.89448	12.7204	8.38549	7.8998	11.6361	9.61004	8.15975	7.92803	10.4459	8.86806	10.067	9.39115	8.03156	10.4366	10.6819	10.4867	10.3119	10.0325
LPXN	8.61494	9.32489	7.94636	10.9756	8.55333	10.7105	8.14136	7.98599	7.97784	7.93994	8.12949	10.101	7.94939	8.03141	8.92696	7.92172	9.94989	7.97784	11.4866	9.01781	7.88723	9.31718	7.91773	7.8994	9.04403	7.86952	8.72157	9.19415	8.90426	11.2403	9.11182	7.99555	10.9325	11.6944	11.5818	11.3808	11.8916
LSP1	8.04388	8.69637	8.49471	9.37379	9.56702	8.69362	8.79388	10.1435	10.1751	9.65336	9.37743	9.63986	8.53331	9.12454	10.0471	9.78737	9.07184	9.99181	9.45303	8.43792	9.16043	8.7797	8.55158	8.32192	8.66765	8.34127	9.61125	9.28881	8.64849	8.90527	8.76232	8.53898	9.1723	9.07303	9.11767	8.95787	8.74573
LST1	7.90067	9.45708	8.67486	9.02136	8.44109	9.09213	9.00339	8.67873	8.29434	9.21272	9.48996	8.78516	11.0049	9.1055	9.90453	9.63407	9.75646	9.49258	9.39029	8.51915	9.89516	8.9281	9.90097	9.54315	10.0396	8.5659	10.644	10.0668	10.6514	9.71886	11.0584	9.43251	10.1246	10.4312	10.5036	10.7294	10.3466
LTB	7.97506	8.48336	10.9067	8.96389	8.62481	8.88175	9.35809	9.64499	7.94124	8.86411	9.2349	8.00954	12.0638	9.81525	8.7525	9.17954	8.78058	9.32545	8.96561	7.89749	9.35788	8.68219	10.2719	7.88066	9.05863	7.91619	9.93835	8.717	9.74586	8.4084	9.63698	10.8715	9.13184	9.95985	10.099	9.45983	9.70115
LY96	10.3905	14.0051	10.1281	13.3797	14.0584	14.0364	14.3315	10.8635	12.1485	13.5545	14.2868	14.1638	9.80772	14.1265	14.2111	14.3146	14.1098	14.1315	14.0364	12.502	14.1041	11.4984	14.5094	11.4933	14.1671	12.2336	14.5767	14.3538	13.9406	13.9838	14.0546	14.4923	14.1865	14.2597	14.1497	14.3461	14.3723
LYZ	7.89727	8.31725	8.09784	7.90727	8.43639	7.98398	8.9464	8.10811	9.11139	7.97375	8.85906	8.435	8.57395	8.62661	8.1925	8.96148	8.67031	8.11832	8.0439	8.73976	11.1742	8.93305	8.90836	8.6006	8.59702	9.46959	9.65691	9.20471	8.31713	9.75317	8.18058	9.46721	9.07418	9.39142	9.91584	9.51213	9.2929
MAFB	8.41576	8.08735	8.55811	10.3851	9.24169	12.3126	9.55601	7.90931	7.86483	8.26294	8.95281	8.13834	7.96654	9.94085	10.5251	7.87975	10.7164	8.43022	9.26839	8.75513	7.92766	10.0745	8.15498	7.97493	9.50452	8.18737	7.9078	10.6238	7.90628	11.7985	7.923	11.92	12.02	10.1787	11.8963	10.8452	12.6372
MFSD1	13.9441	12.657	10.4705	12.0702	11.9315	13.3797	11.3781	10.2533	8.84795	10.388	11.6187	10.4278	9.32853	12.2233	10.9674	11.4132	12.3996	12.2911	12.323	9.35294	13.0188	10.4675	8.15498	12.2224	12.2204	9.25647	12.8897	11.6819	10.8315	13.1935	11.2284	8.03156	12.9581	12.8163	12.8668	13.1591	13.4285
MICAL1	8.44375	10.0231	8.1547	10.7186	7.99565	10.8994	9.35282	8.06211	11.9978	10.529	7.91151	14.1416	7.86678	10.0024	8.07075	7.91596	9.82467	9.23256	8.78422	9.86849	9.21126	12.0978	7.8717	7.89216	7.88203	7.95853	8.19121	7.87723	7.89181	9.8903	7.86979	7.85483	9.69895	10.3689	10.7591	9.67901	9.42479
MNDA	8.03087	9.79397	8.47526	8.46386	7.85314	8.08906	7.95978	8.00675	9.29245	8.02116	7.99359	11.2749	8.18123	7.97251	8.65964	7.8876	8.38714	8.17794	9.40803	7.86479	7.86812	7.87939	8.70459	7.9362	8.12122	10.7505	10.9512	8.27787	8.06748	8.18207	7.93644	12.033	9.09845	8.67009	9.9553	9.87511	8.59279
MSN	13.4826	11.369	10.2614	8.36223	10.3061	11.6469	8.45576	8.21036	8.22747	8.27375	9.02032	7.92039	8.2113	7.91445	9.9734	8.198	11.3586	8.19183	9.46563	8.48395	9.06556	9.2203	8.10656	13.2922	8.08655	10.3538	8.31734	9.78575	7.94147	10.4353	7.90871	8.56528	11.1814	10.4252	11.6236	10.856	11.6863
MYO1F	8.11789	7.90482	12.912	8.05826	8.00464	7.86522	7.95286	7.90451	7.89747	7.88161	7.87451	7.9227	11.6691	7.89315	7.90923	8.04222	7.84922	7.87559	7.92149	8.91294	7.87406	7.88272	8.13826	7.9045	9.08031	7.93484	7.88182	7.89679	7.88473	7.88493	7.87245	8.08999	7.8872	7.84447	7.89995	7.86017	8.75994
NCF2	8.1775	8.19959	11.3007	9.28137	8.2218	8.36697	8.15059	8.88365	8.5734	8.63896	8.18412	8.35822	11.1237	8.61939	8.09727	9.12319	8.67739	8.54683	8.30159	8.60842	8.50442	8.00117	8.18179	7.91025	8.02549	8.12133	9.02239	8.16935	7.89558	8.032	7.97813	8.9412	8.00542	8.13579	8.16937	8.23003	8.10541
NCF4	7.92129	8.74837	8.04809	8.00639	8.22479	8.49817	8.90878	8.1966	8.53547	8.14754	8.32734	8.47718	8.28445	9.06055	8.62139	8.1073	8.56579	8.32744	8.2421	8.29644	8.29232	8.15044	8.48603	8.21411	8.61452	8.69567	8.79036	9.31365	8.68298	9.02308	8.60441	9.95023	9.25599	9.26005	8.87975	8.78811	10.2374
NCKAP1L	8.67231	8.13797	11.3222	10.2009	10.7745	10.8744	11.9223	9.07289	8.99905	11.4776	11.8569	10.4426	10.3395	12.7669	11.5348	12.6475	11.0725	8.02252	12.1904	10.5884	12.2451	14.0679	8.93386	8.95717	12.3296	10.7359	13.1754	12.1866	11.9737	12.5752	12.3808	12.6144	12.7403	12.4662	12.7118	12.7669	12.452
NFKBIA	12.246	13.865	10.6809	13.8212	11.3751	13.4409	12.5611	13.0581	12.8691	13.9473	14.3583	14.6317	10.0421	13.35	13.8888	13.6793	14.3378	14.0395	14.2171	10.5975	14.0624	11.628	13.6822	13.2507	13.712	11.801	14.4436	13.5846	14.0006	14.1206	13.8122	13.8535	13.8505	13.7724	13.8947	13.886	14.3354
NKG7	7.9096	7.98064	7.9559	7.91562	8.45918	8.34017	8.05103	7.88493	7.95391	7.9947	9.94008	7.90207	7.903	7.90123	8.22274	7.87137	7.87883	7.97784	7.89429	7.86762	8.30039	8.60474	8.08382	8.15901	7.93363	8.84823	13.4185	7.95271	8.42535	8.75843	7.91143	8.56528	9.09277	8.50183	9.35723	9.09804	9.41899
P2RY14	7.87878	7.85891	9.46998	7.89955	7.90941	7.86121	7.92265	7.85361	7.89723	7.87532	7.9103	7.85062	8.8992	8.05735	7.86637	7.8624	7.86667	7.84073	7.86285	7.86711	7.87987	7.9076	7.88912	8.98637	7.87694	8.13167	7.87639	7.89761	8.18882	7.88472	8.10453	7.96831	7.88305	7.87563	8.15143	7.87956	7.8681
PLEK	8.14003	10.0035	8.13711	7.91792	7.94608	10.421	7.85175	9.95311	8.01633	8.0111	11.4465	10.101	7.90829	7.95434	9.65651	7.90564	11.6706	11.8886	11.2077	8.60842	10.6752	9.42199	8.60662	11.0102	11.1154	7.98798	12.6169	10.685	10.4014	11.6176	10.0134	7.94838	10.9647	10.8809	12.5001	11.633	12.2849
PRF1	7.89374	7.88611	7.85056	7.89087	7.94608	7.87089	7.87255	7.8402	8.50174	7.85268	7.89035	7.94198	7.97452	7.8449	7.86893	7.89942	7.85903	7.92364	7.90119	7.91061	7.84367	7.8756	7.90492	7.98051	8.8149	7.93484	7.92803	7.87723	9.15283	7.86548	9.28508	7.99555	7.87071	7.84301	7.8968	7.84756	7.90166
PSTPIP1	7.83592	7.8126	7.91079	7.87083	7.84646	7.90042	7.87415	7.93	7.90087	7.91041	8.71584	7.91826	7.94491	7.8712	7.86232	7.85875	7.84323	7.85215	7.82943	7.89035	7.83042	8.08617	7.8499	7.85149	7.88119	8.08553	7.84201	8.85698	7.88166	8.45557	7.90274	7.91512	7.83985	7.86549	7.88563	7.85124	7.86231
PTGER2	7.86998	7.92199	7.90193	9.88184	7.89159	8.92243	7.88542	8.01323	8.60695	7.86476	7.88429	7.89109	7.96013	7.9004	7.86773	7.88312	7.86157	7.92364	7.89576	9.82766	7.95466	7.92349	14.2515	7.87488	7.94865	7.86036	8.09102	7.88318	9.4287	7.95025	9.47775	7.86959	9.56049	8.56611	9.36978	7.87338	7.89218
PTGER4	8.6421	7.92148	7.90594	9.87511	8.62791	9.84811	8.12284	9.65499	11.3832	8.09894	7.9027	13.1565	7.95446	7.94397	8.53357	8.50678	9.87024	10.854	8.84507	7.87667	8.82384	8.99493	8.53584	10.1841	9.24209	8.26704	8.90167	9.20309	9.35996	9.24693	9.07194	8.37567	9.02694	9.63389	9.45865	9.54205	9.78461
PTPRC	7.95676	7.91013	9.71159	8.25283	8.42124	7.99198	8.6359	7.9496	8.75721	7.92206	8.84583	7.90309	9.56646	8.58636	8.23171	8.24496	7.90266	8.12618	7.89114	8.66374	7.99403	8.4461	8.10421	8.66978	8.92996	8.66505	8.5734	8.76699	8.38367	8.52419	8.48963	8.97956	8.26838	8.07376	8.68095	9.1261	9.3624
PTPRCAP	8.2706	10.6332	15.1191	8.60814	8.9538	10.3613	9.08706	10.6407	9.22958	8.1273	8.73468	9.22341	13.5017	7.95877	10.4153	13.6296	9.57474	13.5034	8.76009	14.9069	12.2422	10.2622	8.67477	8.39791	12.4686	8.71761	9.0942	10.492	10.3595	9.9469	10.9402	8.7849	10.8045	11.2899	12.7105	11.4117	12.3187
PTPRE	8.77826	8.28613	8.22521	8.31706	8.69001	8.39044	8.93783	8.8973	8.5748	8.6291	8.79828	8.03209	8.39159	8.80414	8.96496	8.6157	8.41128	8.7582	8.69551	9.18592	8.96474	8.24397	9.26339	8.32608	8.19179	10.4346	9.01122	8.23119	8.14708	8.09893	8.08282	9.05353	8.8653	8.04432	8.26727	8.32822	8.36078
PVRIG	7.85136	7.85979	7.87411	7.85259	7.90622	7.84247	7.90896	7.86647	7.98359	7.88753	8.01594	7.94198	8.06725	9.27827	7.83803	7.92955	7.88976	7.8976	7.87202	7.86634	7.86872	7.82811	7.9403	7.89653	7.87605	7.86952	7.87632	8.6207	8.94478	7.87159	8.59597	7.86324	8.31528	8.08524	8.62245	8.32322	8.29506
RAB27A	8.35214	7.99666	9.12924	7.96927	8.24307	8.26112	8.23225	8.41927	8.28296	7.92163	8.03152	7.91868	8.63973	8.60698	8.15888	7.93306	8.08235	9.24537	8.36967	7.9767	7.95211	8.31028	7.89229	9.13364	8.3294	8.02074	7.89423	8.56987	8.631	8.16551	8.80556	8.01656	8.09576	8.04842	8.3705	8.34056	8.23286
RABGAP1L	8.93021	10.0597	10.6538	10.8718	9.80847	9.68177	11.4459	9.39127	9.92026	10.1935	9.86578	9.9631	9.64959	12.122	11.3185	10.3392	10.1765	9.23256	10.0383	9.97505	10.287	9.78098	10.6271	8.89709	10.4715	10.9932	10.5198	10.5503	10.8832	10.0548	10.5046	11.0837	9.51813	9.79954	10.7205	8.89619	10.0891
RAC2	7.92535	9.03292	7.98108	9.22929	9.11042	9.29461	7.91889	9.23695	9.39826	8.70149	8.23376	8.60946	8.33722	8.42887	8.80088	9.57788	9.30449	8.77445	8.99934	9.28677	10.6298	8.00117	10.064	8.11251	9.40288	7.89975	9.7792	8.69454	8.34027	11.9642	8.4274	9.53284	9.55622	8.96994	9.66431	10.7799	10.6211
RASSF2	7.9673	8.41062	9.82324	9.3051	9.2178	8.3249	9.03928	8.80352	10.1644	8.7494	9.31695	9.58219	10.1148	8.87463	8.82218	9.7131	8.54603	8.52457	8.97313	8.93104	9.33106	9.98056	9.14259	8.82293	8.72434	10.0055	10.8736	8.68691	8.5278	8.38572	8.28755	9.31756	8.29023	8.51233	8.5899	8.54154	8.65573
RGS1	8.07459	7.92544	7.90137	7.8863	7.84155	8.55352	7.79055	9.52599	13.0297	7.9889	8.39731	11.4833	7.90052	8.39025	8.0403	8.91656	9.2635	8.17794	8.36132	8.57754	7.88723	7.92349	7.97197	10.2636	7.89857	8.2233	10.1728	9.14722	8.92096	8.48737	8.88023	9.52304	8.63431	8.21503	7.90542	8.67506	8.06992
RHOG	10.2684	9.82502	9.15283	9.42302	9.73653	10.1991	9.48946	9.78978	9.19105	8.87316	8.90224	9.73564	9.5986	10.1847	8.88357	8.80286	10.2907	10.9667	10.1601	8.18367	11.075	9.82058	10.3654	8.67959	9.96727	8.79573	9.96843	8.88795	9.48529	10.8244	8.9879	10.8744	10.1824	9.81103	10.2835	10.8628	10.4788
RHOH	7.90811	7.97039	7.95167	8.80689	8.9538	7.91889	8.03337	8.12936	8.1946	8.48183	7.88303	8.37306	7.89832	8.19882	8.00518	9.20991	7.99717	8.46394	8.03535	8.20075	8.73867	8.67826	8.99462	9.47009	8.03199	7.88068	9.25115	8.08922	8.15564	7.9684	7.99141	8.80218	8.18828	7.95573	7.98273	8.21235	7.92008
RNASE6	8.19657	7.8693	7.83904	7.93713	7.91483	7.86596	7.88196	7.9111	7.9201	7.93563	7.86392	7.93346	7.87778	7.88521	10.0773	7.86041	7.99185	7.89181	7.96585	8.51458	7.96763	7.87834	8.05885	7.93994	9.71432	7.82763	7.80955	9.84811	7.84773	10.1235	7.88205	7.84016	9.64023	8.77732	8.23781	9.86012	7.96013
S100A8	8.0236	8.80788	8.60516	7.89518	8.42007	8.12959	7.85661	9.54429	7.8486	9.10681	8.43841	7.86401	8.13444	8.669	8.15503	8.81852	8.79875	7.87338	7.93854	12.1626	7.87078	7.87834	7.88068	9.22866	7.97451	7.89332	7.90207	8.71512	7.88977	7.93196	8.07003	8.13872	8.27106	8.18246	8.06777	8.60662	8.68186
S100A9	9.89593	8.76289	13.3946	8.77605	7.99565	8.4457	9.39989	9.55601	7.95025	10.7482	9.5658	7.89109	12.2648	9.02515	8.91098	9.68413	8.38272	9.56605	9.29976	7.85979	9.71297	7.90108	7.9203	7.92596	8.50152	14.0236	7.97956	8.53397	11.7173	8.27225	12.1798	11.8939	8.21171	9.01058	8.53943	8.33177	9.45616
SAMHD1	8.46155	7.87097	8.01659	7.9042	7.86682	7.86415	7.89553	7.87825	8.3182	10.3785	7.9027	7.90207	8.86498	7.88208	8.46386	7.88312	7.91075	8.19183	7.85621	7.87397	8.03574	10.527	7.90146	9.27048	9.92698	8.17246	7.92178	7.86908	7.85521	10.5921	7.87841	11.7153	8.89805	8.88438	9.25656	10.8377	10.4089
SELL	7.85535	7.86463	7.90053	7.8572	7.8551	8.56268	7.90003	7.86937	7.86816	7.92446	7.88303	7.91595	7.97452	7.93561	8.03491	7.84297	9.48679	7.92142	8.20118	8.05208	7.88912	7.88925	7.95404	14.1177	7.849	7.86036	8.11	7.87131	7.85637	7.89334	7.85634	7.8709	7.84164	8.8719	7.85132	7.87769	9.55503
SELPLG	7.87774	7.86651	11.8829	7.93803	7.98012	8.20003	7.92234	11.5691	8.00542	7.90453	8.14384	7.95944	10.9785	7.84094	9.37634	11.4445	9.40609	9.5905	8.15098	7.89035	7.9492	10.8425	7.92535	12.3147	9.53002	7.9095	7.84966	9.8571	9.54643	9.41519	9.27334	7.93937	9.22858	9.87511	9.93579	9.69065	9.98499
SH2B3	8.66198	8.32813	8.04498	8.42409	7.90828	8.18972	8.21815	8.93674	9.48331	9.04114	9.50035	7.85037	7.94491	8.87443	8.4381	9.42671	8.12655	8.23841	8.21153	9.84953	8.45508	7.93681	7.83134	7.91255	8.28756	7.95853	10.6354	8.37108	7.90628	8.17086	8.05767	7.99555	8.17195	8.04498	8.99195	8.1047	8.17836
SLA	7.99503	8.58503	8.4793	8.52403	8.99132	8.48144	9.21186	8.50493	8.83318	8.66621	8.88179	8.65221	7.92154	8.83505	8.81299	8.83312	8.85902	8.25012	8.81225	8.88192	8.76889	8.32152	9.58925	8.56483	8.97442	8.20381	8.55821	8.66364	8.7072	8.69928	8.43275	9.13672	8.78536	8.86253	9.08401	8.99757	8.84422
SRGN	8.18825	8.48704	8.01308	9.17186	8.31062	9.38358	9.37032	10.509	8.50879	10.6497	10.5108	9.2637	8.58753	9.69612	9.27009	11.0144	9.92903	8.91374	10.4807	9.20787	10.8165	8.74098	8.20476	7.89518	10.1255	8.8291	9.31175	10.3994	9.74512	9.59621	9.97903	11.4597	10.2653	10.4718	10.8847	10.6003	10.4207
TAP1	13.1503	13.1831	9.87912	12.8027	9.82158	13.4752	15.1138	7.93889	10.1789	11.542	9.57338	11.0519	8.7308	12.2467	13.3451	12.8887	12.4821	8.15216	14.2662	12.1702	7.91674	10.5785	8.1722	8.38676	13.8226	10.7203	8.85457	13.5198	11.6303	13.7272	12.3338	8.06761	13.5558	13.3024	14.2082	13.3617	13.8985
TCIRG1	9.20697	9.28697	8.78909	8.31713	8.92905	8.7032	9.03379	8.56052	8.51175	9.2036	7.97347	8.78869	10.4027	9.31621	8.34142	7.97476	9.1443	9.14914	10.4698	9.6136	10.8073	10.4127	7.94834	8.04017	9.74171	8.50718	7.95267	10.77	8.85328	10.5732	9.24502	11.2524	9.0501	9.56864	9.8911	9.95433	10.0823
TGFB1	7.85807	7.88313	7.8454	7.95711	9.20658	7.85714	7.89429	7.89863	7.9201	7.86917	7.88429	7.90736	7.96013	7.90781	8.16719	8.1536	7.90835	7.8889	7.86088	7.9678	9.65187	7.85125	8.03036	7.90141	7.79726	7.88567	7.90081	9.55086	9.67049	7.87583	9.7416	8.00579	9.02588	7.86075	7.85628	8.95481	9.70258
TNFAIP3	8.01879	7.9684	7.84673	7.94968	8.2218	8.13526	8.48126	8.22786	8.07474	8.06689	7.87451	8.72166	7.87622	7.97039	7.92649	8.48536	9.05284	7.89617	8.35428	9.09657	8.24037	8.66719	8.72013	7.9362	8.04737	7.89124	8.51864	8.06663	7.99144	7.93804	7.94724	8.27496	7.95099	8.04604	8.63995	7.93399	7.88083
TNFRSF1B	8.15888	11.9701	9.54786	11.8138	10.3369	11.2536	11.4245	10.7136	8.5899	11.7132	12.2145	10.0148	7.86678	11.1935	11.299	8.29862	11.9265	12.3366	11.069	9.72869	11.9847	13.1616	8.12208	8.05884	12.121	8.29086	12.295	11.6683	11.6544	11.7223	11.3619	8.13872	11.674	12.5752	11.678	12.392	12.4146
TPP1	13.4335	12.4625	10.5777	11.8853	10.0062	12.3199	10.7496	13.1097	8.60695	10.9525	10.5602	9.97143	10.5458	11.431	11.147	11.9051	11.8668	13.2812	11.6683	7.93542	7.90084	10.5238	9.24007	12.8429	11.5936	8.50476	13.7738	12.1923	10.468	12.8027	10.9728	7.95346	12.1923	12.0887	12.0427	12.5563	13.2191
TPST2	9.10464	8.59716	8.12408	9.93302	7.90537	10.1327	9.34512	7.91087	7.97151	9.45219	10.5053	8.63422	7.89076	9.67065	9.26275	9.09372	10.3615	7.90379	10.3007	8.23859	10.7679	8.46756	7.87743	9.26536	10.1546	8.19094	8.44262	9.77364	10.0514	11.5343	10.1837	9.72572	11.0162	11.2283	10.9778	11.0569	11.2059
TRAF3IP3	7.97351	7.99896	14.9128	9.95704	10.4941	7.98305	7.83881	7.87935	7.87176	7.92718	7.86588	7.83822	12.4679	7.86635	7.97598	7.84816	7.98342	8.56611	8.10599	7.85391	7.88912	8.66719	7.89681	7.89216	7.85208	7.90426	7.85663	7.83352	9.1757	8.06906	9.71227	7.83032	7.95568	7.9477	7.94723	7.95537	9.22508
TYROBP	7.88976	7.90087	7.84026	7.84463	7.86573	7.82984	7.92764	7.88973	7.9201	7.98225	7.89035	7.9894	9.45616	7.89942	8.39482	7.90564	7.89246	7.88274	7.92069	7.86876	7.87868	7.90389	7.80565	7.89292	10.7248	7.97085	7.94997	11.6995	7.94531	8.27036	7.87438	7.94838	9.33535	7.87089	9.62399	9.85877	10.5389
VAV1	7.96631	8.07132	7.85158	8.12467	7.93255	8.07431	8.60791	8.63908	7.8827	8.71652	8.47869	8.18667	8.04039	9.31185	8.23292	8.15799	8.11416	8.09085	8.12355	8.60842	9.25149	7.93196	8.87279	9.81564	8.25302	8.12133	8.62019	8.08266	9.65704	8.46931	8.46234	9.20634	7.98083	8.31897	8.19265	8.06889	8.05739
VNN2	7.87317	7.96808	9.25093	8.32866	8.45996	8.13521	8.20043	8.24176	8.90926	8.39842	8.11748	9.38933	9.36306	8.03643	8.11868	8.29806	8.1274	8.01122	8.20393	7.96428	8.29714	8.41214	8.2268	8.61857	8.011	7.97686	8.63289	8.41607	8.75725	8.26003	8.58002	8.33879	8.11802	8.23083	7.99526	8.17428	8.41396
WIPF1	7.90825	8.0627	9.79187	8.27221	7.92689	7.92639	7.91761	8.02861	10.6183	7.95095	7.88561	9.50617	9.06987	7.89938	8.95094	7.96195	8.05054	7.95836	8.74686	7.98134	7.97681	8.34892	8.02704	8.03578	8.05459	7.96422	8.32947	8.0164	7.85212	7.99519	7.87432	9.09596	8.14172	7.90108	8.17547	7.97712	8.02742
ZAP70	7.91034	7.91989	7.98731	7.97268	7.97461	7.92576	7.90125	8.22064	8.76831	8.37321	8.06978	7.93699	7.96522	8.27579	8.00216	8.03553	8.02636	8.85888	7.90977	7.86834	8.00702	7.89435	8.00704	8.78505	8.04811	8.55561	8.00609	8.03046	8.11025	8.02067	8.23373	8.23571	7.97211	7.98649	8.10572	8.00214	7.98646
NAME	GSM954810	GSM954821	GSM954809	GSM954822	GSM954803	GSM954795	GSM954790	GSM954817	GSM954808	GSM954797	GSM954798	GSM954826	GSM954815	GSM954823	GSM954816	GSM954802	GSM954796	GSM954791	GSM954792	GSM954814	GSM954793	GSM954801	GSM954813	GSM954812	GSM954819	GSM954805	GSM954820	GSM954811	GSM954800	GSM954807	GSM954799	GSM954824	GSM954794	GSM954804	GSM954818	GSM954825	GSM954806
StromalScore	-4.64299	-2.16472	-1.23148	-0.832803	-0.245339	-0.226578	-0.226368	-0.207817	-0.138522	-0.118998	-0.0690107	-0.0612617	-0.0479988	-0.0261909	-0.0153308	-0.0106083	0.0417985	0.0723005	0.12943	0.167587	0.171145	0.183546	0.2457	0.359139	0.376319	0.428645	0.438805	0.455974	0.506557	0.573856	0.602583	0.641296	0.768353	0.867184	0.967673	0.969422	1.2987
Sample	GSM954810	GSM954821	GSM954809	GSM954822	GSM954803	GSM954795	GSM954790	GSM954817	GSM954808	GSM954797	GSM954798	GSM954826	GSM954815	GSM954823	GSM954816	GSM954802	GSM954796	GSM954791	GSM954792	GSM954814	GSM954793	GSM954801	GSM954813	GSM954812	GSM954819	GSM954805	GSM954820	GSM954811	GSM954800	GSM954807	GSM954799	GSM954824	GSM954794	GSM954804	GSM954818	GSM954825	GSM954806
ABCA6	7.90441	10.9327	9.87273	7.98684	8.48842	8.03723	8.43665	8.32448	8.92354	8.22703	9.40731	9.49776	8.09504	8.3211	8.12152	7.92784	8.99665	8.03033	7.95057	8.93861	8.18338	8.23016	7.96824	8.18491	8.04203	8.6572	8.06805	7.93753	9.08116	8.42122	8.58598	8.26934	8.42677	9.26383	9.01199	7.98038	8.89453
ACTG2	13.0215	10.4455	11.5019	13.8612	14.7426	14.1588	12.8787	13.1188	11.4933	14.7519	13.3347	14.3193	14.3495	14.3995	14.0193	14.0023	12.8429	13.6337	14.4966	13.5034	12.5185	13.4001	14.4523	14.582	12.3251	14.8019	13.9838	14.6375	14.0792	14.202	14.7911	14.9531	14.8183	14.4275	14.8871	14.2035	14.8159
ADAM12	8.09931	8.40925	8.51888	8.16152	9.6851	8.72315	9.84001	8.88677	8.6916	8.43484	8.15234	9.63836	9.15103	9.62198	9.22329	8.97941	8.45794	8.13128	8.67196	8.70971	9.75198	9.58958	9.06251	8.90863	9.72785	9.2344	8.49004	8.45291	9.41189	8.81484	8.81674	9.27065	9.08406	9.22617	8.84237	9.17259	9.2721
ADAMTS5	8.9345	8.11717	8.25076	7.96669	7.88362	7.84756	7.88409	7.90246	7.86901	7.88273	8.31485	8.00221	8.86325	7.93634	7.9382	8.80511	8.36197	7.87131	7.89278	7.90146	7.86952	7.85334	7.92238	8.28713	7.88493	7.87784	7.89686	8.09736	7.87504	7.87621	7.94738	8.09569	7.90446	7.87204	7.88912	7.91171	7.94224
AIF1	8.04718	9.67733	9.39504	9.07168	10.1572	9.06088	9.3012	9.3685	9.46683	9.63034	8.80281	8.70798	9.94218	9.32689	9.16812	9.16779	9.9392	9.94153	9.36138	10.5192	8.92764	9.44202	9.38329	10.1313	9.29816	9.81365	9.59132	10.1602	9.83689	9.68653	9.48	9.59438	9.92055	9.75015	9.27647	9.58598	10.6221
AOC3	8.02665	8.10541	10.2289	8.84421	9.1291	8.5986	9.81274	8.67739	8.33336	11.5114	8.22268	9.16103	8.89943	9.86313	9.17357	8.38422	7.86634	8.79028	8.30571	9.61124	9.7496	9.86538	8.58778	9.65177	9.00422	8.69087	8.99925	10.2474	9.89046	8.63761	9.35673	8.24217	10.2276	9.40821	9.80122	8.6022	11.1115
APBB1IP	8.21815	8.2838	7.91698	8.83185	8.73674	8.66485	8.46496	8.43638	8.12775	8.66167	8.40928	11.131	8.20756	9.8198	8.14563	8.31283	9.28677	8.63329	8.95629	8.62463	7.87735	8.93271	9.02276	8.47003	8.85876	9.3326	8.68911	10.1565	9.31781	8.4597	8.79047	8.21829	8.24037	8.19794	8.49263	9.13184	9.0942
ARHGAP28	8.16498	7.91646	8.13395	7.88054	7.98006	8.90848	8.93335	8.32961	8.47494	8.29112	8.22959	8.42789	8.18118	7.89496	8.26091	8.2256	8.09357	8.2809	8.61236	7.91133	7.91564	7.97914	8.29816	7.97665	8.26546	8.16048	8.908	7.94018	8.12986	8.58345	7.86797	8.10637	8.98994	7.93278	7.93378	8.68016	7.87457
ASPN	8.07888	7.84946	8.09127	8.99308	8.11474	8.39904	9.78147	8.76156	8.86093	7.95393	10.5037	7.8713	8.34027	7.97065	9.23653	8.25092	8.15542	8.80088	8.77336	8.12208	8.68876	9.98859	12.0207	8.80654	11.954	11.0578	11.028	10.3116	8.18498	10.2709	11.5778	9.58307	10.4974	9.19569	10.9101	9.51653	11.6299
ATP8B4	8.64348	7.97197	8.1565	9.10734	9.75363	9.33016	8.90162	9.32247	8.5389	8.2218	9.13333	8.53992	8.28532	8.93674	10.0966	8.01379	9.09657	9.15114	9.62761	8.09183	8.47344	8.6118	9.3326	8.81936	9.36268	10.6981	8.09708	8.46394	7.97784	9.9743	9.0921	9.59682	9.41176	8.41562	8.38279	9.94249	9.24007
BGN	14.5134	13.1773	14.1692	15.4963	15.0906	14.7036	15.2335	15.1335	14.5134	14.4385	15.3646	14.607	15.1953	15.1395	15.5153	15.3646	15.3719	15.1834	15.4851	15.0081	14.1468	15.3247	15.5048	15.4402	15.8101	15.2955	15.7003	15.2335	15.302	15.0298	15.4313	15.529	15.3088	15.529	15.5153	15.4851	15.1538
BTK	7.9447	7.95271	7.94012	9.01236	10.2253	8.27352	9.27798	9.40882	9.31025	9.80168	8.14272	8.18527	8.7377	9.29615	10.0312	8.52367	10.7044	9.00387	9.20407	12.5864	9.27892	9.60333	8.81179	11.4034	8.62278	9.48635	8.14692	8.79306	12.9423	9.10092	9.40944	9.36162	9.80693	8.83722	8.87159	9.50299	9.75728
C1QA	8.01203	10.0346	8.38096	8.08214	8.11474	8.21268	8.16646	8.30856	8.05232	8.35743	8.09766	8.76111	7.91915	9.00125	8.49794	8.07643	8.33442	8.62981	8.43453	8.72013	8.31592	8.67043	8.50588	8.63821	8.27337	8.69894	8.31429	8.94682	9.39826	8.54677	8.80433	8.71335	10.6102	8.19284	9.98224	8.36578	8.77623
C1QB	7.98851	9.97516	14.4678	10.987	14.2497	10.2518	8.21263	11.1398	10.1391	9.80168	10.0529	8.81936	11.4099	9.39002	10.449	11.4394	11.6012	10.9863	11.1916	8.05885	8.50476	9.38875	10.9075	13.9874	9.03854	11.8051	8.67929	9.23256	11.8177	12.8052	8.35428	11.7795	9.567	10.1667	9.4636	11.7616	9.36717
C3AR1	7.89595	7.95813	7.89832	8.04344	9.22587	8.62533	9.15729	8.52551	9.58037	8.26829	8.18567	9.57132	7.99883	8.88453	8.21499	8.20241	9.28677	8.67315	8.53943	9.77699	7.99936	9.70613	8.50201	10.1572	8.33786	9.08706	8.07655	7.97283	11.8963	9.06282	8.85528	8.9243	9.42414	8.67166	7.99359	8.60173	9.06996
CCR1	7.90145	7.89624	7.87136	7.90042	7.93861	7.92647	8.13049	8.67373	7.89315	8.19779	8.01363	7.92011	8.02725	9.96255	7.91571	8.29252	7.89448	8.58193	8.25366	8.99462	7.93086	7.8685	7.93092	8.06769	7.99786	7.95447	7.94592	7.83158	7.85783	8.5888	8.04421	8.07735	7.92096	8.05214	7.84329	8.35487	7.8663
CD14	10.4108	9.79514	11.2445	11.2502	11.3493	11.2374	11.2568	11.271	10.1184	11.3081	11.0594	11.3554	11.5689	11.3158	11.3621	11.2595	10.4748	11.2727	11.1712	11.4462	10.4448	11.3043	11.191	11.3845	11.2791	11.364	11.2089	11.5679	11.3014	11.3739	11.2069	11.3483	11.5187	11.2627	11.5627	11.3702	11.3503
CD163	7.98229	7.93832	8.07621	7.95616	8.75621	8.97943	9.04413	8.89968	8.61556	8.20112	8.24673	8.20582	8.94012	9.56676	9.01734	8.99426	9.89879	8.98401	9.41909	9.92587	9.42319	8.9891	8.98695	8.61456	9.13052	9.12091	7.9762	8.16306	8.76911	9.87169	8.13584	9.45805	11.296	8.62007	8.18635	10.598	8.39802
CD200	7.95368	7.88378	8.12196	8.36602	8.48749	8.59337	10.2124	8.72244	8.1252	8.95347	8.334	10.4705	12.5264	9.90655	8.1027	9.32866	8.7197	8.62551	8.24844	8.92329	9.68328	8.29993	8.00433	8.85183	8.95523	8.62636	8.75252	8.24532	8.9076	8.90273	8.64492	8.1035	8.63623	9.02666	9.85445	8.75152	8.75505
CD248	8.69695	9.16596	7.96013	12.033	13.9015	11.4201	10.7388	11.5128	10.5921	9.7852	11.1447	7.86917	11.4425	12.13	11.4394	11.4016	11.6771	11.4829	12.1707	10.2161	13.6594	11.2905	12.6399	13.0169	11.872	12.1199	11.9576	9.07894	11.4303	12.3015	7.94151	12.8617	8.39674	11.5948	10.9216	12.7403	13.1935
CD33	8.06364	7.85489	8.96767	7.86561	7.85661	7.84152	7.88519	7.88693	7.89426	7.90622	8.1201	7.84026	7.91632	7.84814	7.84858	7.86237	7.92333	9.03425	7.91699	7.88682	7.88756	7.92149	7.88268	7.86497	7.90286	7.87293	7.86846	7.85576	7.8827	8.86475	7.85629	8.19669	8.00579	10.0677	7.84329	8.6373	7.90652
CD86	8.06025	8.31006	8.90089	8.78561	9.73564	9.21347	9.25502	8.88517	9.16242	8.74375	9.02435	9.57828	9.7109	9.15295	9.39935	9.6315	10.7378	9.74326	9.20566	9.42733	9.61821	9.34443	9.81465	9.54341	8.9184	9.59803	9.418	8.93672	9.5509	9.49093	8.74461	9.1325	9.75268	8.95222	8.69433	9.22356	9.81788
CD93	7.88203	7.84946	7.85208	7.83613	7.82734	7.85325	7.86471	9.8608	7.85523	7.99565	9.24147	7.86917	9.47727	7.89683	7.86237	9.7758	7.86479	7.97451	7.86939	7.8415	7.87204	7.84068	7.85128	7.88956	7.92735	9.48384	7.87245	7.95015	7.81939	8.63344	7.8713	7.88264	7.85691	10.7238	7.94774	9.64202	7.85038
CDH5	8.06672	7.83863	7.85874	7.82351	9.23591	10.8445	7.84741	9.49457	7.97355	7.93255	9.648	7.8713	9.33146	11.1359	9.644	9.91197	7.87132	10.396	7.80045	7.8188	7.97889	8.15316	9.53869	7.85709	10.0285	10.0473	9.40038	7.88396	7.93115	9.96004	7.84946	9.79168	7.88161	7.85024	7.84424	10.0095	7.84007
CH25H	7.86062	7.88162	7.96013	7.90628	8.15551	7.88562	7.94695	8.46669	7.91233	8.01428	8.88611	7.87353	7.86983	7.88912	7.92413	7.87376	8.0805	8.97787	8.55788	8.16316	7.8642	8.15098	8.9878	7.92534	8.17202	7.91534	9.18737	8.01472	8.02705	9.47853	8.06803	8.19123	8.19696	9.691	7.95812	9.08446	7.92591
CILP	8.21233	8.05008	9.26827	9.62464	9.98013	9.78	9.72149	11.0057	9.5823	13.5477	9.18246	9.12292	8.39567	11.0185	10.6441	8.53075	10.9102	9.38694	8.97105	8.14656	10.4168	8.00325	8.7678	7.88043	9.94658	12.3465	11.2701	9.55064	8.04553	8.37729	11.5769	8.72945	12.2915	11.6348	10.3506	11.0665	13.1041
CLEC7A	7.91923	8.94516	8.71683	8.32284	8.64042	8.84384	8.69435	8.48189	7.86859	7.98299	8.30585	7.94779	8.69506	8.74225	8.78026	8.59987	7.89848	8.72056	8.53279	9.36983	8.32881	8.99583	8.5645	9.71727	8.75565	9.02362	8.32152	9.93457	9.00172	8.65138	9.00717	9.03581	8.87555	8.54061	8.71056	9.10233	7.87984
COL10A1	8.05221	7.84478	7.90829	7.82239	7.86017	8.63958	9.70485	8.38584	7.85823	7.84753	9.47258	7.85903	8.39899	8.02034	7.86366	8.38744	7.87667	8.65964	8.63509	7.86524	7.9095	7.85825	8.44108	7.89109	9.29528	8.67122	7.88222	7.8876	7.97202	8.92035	10.5085	8.12775	7.82543	9.81609	7.8539	8.7397	7.88182
COL14A1	7.98952	8.65038	10.4893	8.69565	10.7854	8.5285	9.65807	8.16391	9.97865	10.829	8.38369	9.5954	8.32746	9.85297	9.03528	8.1535	10.9804	8.63527	8.2817	10.9157	11.6824	9.2273	8.71627	10.4087	9.09052	8.87221	8.67518	9.3076	10.611	8.25158	9.58215	8.19481	9.686	9.29615	9.66901	8.62533	11.2246
COL15A1	8.77837	12.3488	12.0298	10.729	7.89553	10.9478	10.8935	10.4971	9.64085	8.1743	9.82978	7.8645	10.3155	7.87485	7.84913	10.2552	7.8377	11.0525	10.8188	7.87605	10.2472	10.2805	10.5465	11.9546	11.7687	11.2703	11.2683	11.5539	13.4171	10.7493	10.2481	10.8686	12.2256	10.3268	13.1054	11.0004	12.6712
COL1A2	9.68803	11.3276	10.4803	14.0859	14.0754	13.4492	13.5911	13.8519	12.39	13.4152	13.6917	11.6428	13.1548	13.4937	13.5863	13.277	14.2395	13.5772	13.8337	11.4841	12.026	13.7452	13.8624	14.2579	14.1282	12.8966	13.646	13.8461	14.1156	14.0237	13.7127	12.947	14.2388	13.7092	14.3537	13.8126	14.0319
COL3A1	9.69895	9.48802	10.5233	12.8897	12.6559	13.5169	13.2292	13.4069	11.4817	13.6725	13.1954	10.9963	13.1598	12.0227	13.9539	12.8668	13.8306	12.2369	12.7669	10.6728	13.5533	11.6436	13.9406	13.7012	14.1125	12.8978	14.0887	12.3979	13.4274	12.9948	14.0193	12.2611	14.5423	13.5649	14.716	12.7714	14.2953
COL5A3	8.14692	8.0285	8.42656	9.47943	7.86851	7.82795	11.0185	9.76844	8.13308	7.90622	10.709	7.95975	9.06874	10.9756	9.13635	9.30857	7.85049	7.84681	8.85153	13.4707	13.8134	8.95805	9.95773	11.8786	10.1061	8.09906	9.78856	11.7488	14.0846	8.87062	10.0721	9.78676	7.86813	10.1693	11.1965	10.6644	8.40876
COL6A3	8.75041	9.7158	9.47839	10.905	10.7626	10.2622	11.1132	12.2136	11.4965	10.1599	11.6462	9.42446	12.1113	11.1492	11.5333	11.195	10.6938	10.4506	11.2805	10.2621	10.6559	10.8416	12.1928	12.2958	12.3098	11.2436	12.9709	10.7499	12.1372	12.2792	12.1367	11.6804	11.6327	10.5998	12.6009	11.3763	12.6178
COL8A2	7.98136	7.96425	8.64191	8.35209	8.44808	8.35482	8.5867	8.25763	9.01751	8.82882	8.62232	8.42709	8.22965	8.6036	8.85337	8.20285	9.21104	8.09538	8.96295	8.96889	9.44097	8.97238	8.73763	8.84898	9.22426	9.68242	9.27347	9.28427	9.16046	8.57959	9.34004	8.57183	8.97076	9.39236	10.0399	8.23381	9.03685
COMP	8.02195	7.97197	7.88794	10.0789	7.93861	9.57161	7.86569	8.188	9.66144	7.86463	10.2482	7.85968	7.87541	13.2738	7.88446	7.86782	7.86233	11.9501	12.322	7.88803	10.2628	8.90098	10.2184	8.00338	13.4535	11.0304	10.9577	12.4231	7.90464	8.46966	12.5928	13.1486	12.3416	12.6911	13.4519	12.9743	14.3758
COX7A1	7.89575	8.10121	10.785	7.8776	9.16683	10.7372	8.01125	10.6577	10.1799	14.1897	10.1264	7.99045	10.1284	8.05331	9.8086	10.2016	14.2249	9.39838	9.33776	8.08382	9.86815	10.7918	10.7503	8.97161	9.47338	10.8803	10.3048	8.07568	8.01633	7.94978	7.89359	10.0506	11.8124	12.0685	7.95812	10.0715	8.15815
CSF1R	9.98239	12.371	14.3131	13.9144	14.1265	14.202	14.2051	14.2343	11.7761	12.8811	13.1033	14.2645	14.7375	14.2424	14.2082	14.2171	12.4499	14.1724	14.0667	14.2433	12.2559	14.1029	13.7248	14.2276	13.8505	14.2358	13.6117	14.2581	12.3694	14.3828	13.9341	14.0468	13.9229	13.8323	13.4567	14.4418	14.2407
CXCL12	7.87609	9.84026	9.52987	8.12411	8.87523	8.44407	8.06793	8.22127	8.51032	8.27553	8.5726	8.25436	8.42362	8.06305	8.9432	8.4639	7.99781	7.91555	8.42577	8.07972	8.28032	8.21956	8.52524	8.32237	8.16874	8.59025	8.52963	8.47272	8.01869	8.93395	8.0778	8.8315	9.59321	8.865	9.02598	8.24355	10.1641
CXCL14	9.47108	9.55538	9.72004	11.5713	11.9149	12.2245	10.9046	10.5867	12.9871	12.5646	12.6911	10.3747	10.527	12.4731	11.8764	9.47459	11.4699	11.5089	10.714	12.2731	13.1442	13.1364	13.0363	11.9097	12.8078	13.2226	12.7223	11.0837	10.7887	13.4458	11.7323	10.8871	10.6455	12.2674	13.4409	12.5472	13.9514
CXCL9	7.864	7.82291	7.903	7.83731	7.89328	7.83773	7.87051	7.85576	7.84946	7.89515	7.84994	7.81712	7.84773	7.81843	7.85585	7.82598	7.8636	7.84181	7.8504	7.89226	7.87583	7.8487	7.85536	7.88681	7.8571	7.85132	7.83352	7.84339	7.89425	7.86594	7.84537	8.48808	7.85803	7.85024	7.88429	7.84533	7.8602
DCN	8.74744	9.0695	10.2459	11.3158	12.8536	13.4439	12.1671	11.1206	11.1387	14.3777	13.7863	9.41574	12.2177	13.2818	13.3033	12.9446	13.5285	12.2993	13.0039	10.3761	11.5935	11.5713	13.6629	11.2457	13.0541	11.4813	13.6813	11.1305	10.4252	13.1957	14.3063	12.3736	14.2413	12.9693	14.2881	13.0226	14.3935
DDR2	8.0752	8.51089	10.0144	9.61367	8.18967	9.37272	8.12763	10.7583	8.87023	11.1521	11.0194	11.3978	8.78588	8.04235	7.96758	8.8809	9.66052	9.45818	10.3328	8.36582	8.77264	10.5328	10.1952	9.28219	9.01741	9.78895	9.08068	8.69774	8.73942	10.6814	7.958	10.4129	8.32446	9.43477	10.1518	10.3489	9.08512
DIO2	10.7855	8.88052	8.70538	9.52326	10.5681	10.4613	10.3726	8.03031	8.48866	8.01133	9.04692	11.5094	10.1203	8.43074	9.14896	10.4844	9.09789	8.89792	7.96136	10.7825	9.37758	8.79358	8.01164	8.60117	8.01436	8.00728	8.24088	10.7217	9.19466	7.92387	9.06488	8.91547	8.02196	8.08531	10.0261	9.22393	9.1261
ECM2	8.25111	7.87472	7.87491	8.52856	7.96765	8.32168	8.94804	8.80193	8.54779	7.86007	9.39519	7.86448	8.64267	8.9346	8.66477	8.77382	7.89825	8.45923	9.31533	7.85695	7.89119	8.85701	9.74672	10.3077	9.49497	9.04238	9.70486	9.20503	9.49049	8.91251	9.44732	8.71653	9.2819	8.59848	9.13303	9.06658	9.38757
EDIL3	7.92262	7.92647	7.89832	8.58981	8.99531	9.05962	7.83742	8.70555	8.81771	7.87245	8.54013	10.0182	8.54088	9.88151	10.0925	8.50413	7.87991	8.79728	8.43792	8.31471	7.85119	7.91197	8.49552	7.93067	10.4474	8.75319	9.94989	9.05358	7.96205	8.6465	11.0109	8.69565	10.5892	9.6462	11.23	8.47768	8.40876
EDNRA	11.5109	13.8151	12.8956	14.4948	14.5367	14.5621	14.582	14.3894	14.7115	13.712	14.107	13.0782	14.5341	13.7468	14.5582	14.4744	14.8132	14.5662	14.2885	11.3751	12.5111	14.4071	14.4148	14.7036	14.5544	14.0934	14.7201	14.6182	13.699	14.3538	14.6182	14.5009	14.849	14.516	14.7596	14.4071	14.625
EGFL6	8.82467	10.548	10.1981	8.55422	10.9925	12.8394	10.6322	10.0103	12.5543	10.7539	12.708	7.92625	11.2087	11.0459	9.79327	11.1028	12.0413	10.2114	11.5645	9.92064	11.1648	9.88166	10.8179	10.9942	13.0558	12.9351	13.0592	10.7927	11.6374	12.331	13.8132	8.63305	12.131	8.8933	13.4651	10.0293	11.3984
EMCN	7.89344	7.86431	9.14325	7.8991	8.82369	7.89914	8.02984	8.75944	8.76924	7.90828	8.11127	8.69183	8.2019	8.26817	9.17761	7.92956	8.09276	7.94968	8.47848	8.34514	8.36657	8.07566	7.89187	9.24888	8.04678	7.98884	8.84214	10.9873	8.92227	8.62182	9.72734	8.09681	7.93165	9.6716	10.2618	8.17065	8.43061
ENPEP	8.61592	8.54761	8.73851	11.1187	10.6573	11.1561	10.8803	11.5069	10.5978	10.5993	11.6677	9.29247	10.5899	9.29812	11.424	10.4794	10.1341	10.6091	10.4276	8.76396	8.49014	10.8787	11.8493	12.8753	11.2335	10.1418	12.5442	10.3448	11.0981	10.3774	12.3122	10.9506	10.9459	10.7276	11.9975	10.5112	11.81
ENPP2	8.12973	9.48409	8.66775	10.5707	10.1264	10.6028	9.41349	9.87903	9.81644	9.26029	10.9531	8.14674	9.57573	8.001	10.8688	9.86857	8.34528	9.87127	11.4583	7.99366	8.14252	8.68889	10.1363	8.53811	9.77178	10.3699	11.3225	11.5669	9.02387	10.6016	11.6674	9.89263	10.0148	11.5489	8.2969	11.0009	8.45667
ERG	7.89478	7.90947	8.25796	7.93664	8.01716	7.9413	8.12561	8.82074	10.6246	7.99506	8.19756	8.11682	8.0034	8.1687	8.01242	8.14695	8.14813	8.79851	7.99915	8.25831	8.3959	7.96316	7.96806	8.31275	8.28912	8.43514	8.33255	8.01497	8.78833	8.03708	8.09787	8.73442	8.23447	8.69855	9.02019	8.03404	8.54539
F13A1	7.87447	7.85704	7.8897	7.8693	7.87101	7.87808	7.85142	7.89206	7.91233	8.09417	7.93033	7.81137	7.84394	7.84266	7.8592	7.84344	7.83571	7.86369	7.89119	7.8499	9.34525	7.87562	7.85173	7.828	7.86023	7.81295	9.79342	7.88511	7.93706	8.36434	7.85903	7.86133	7.8602	7.86404	7.81043	7.88493	7.84334
FAP	8.38598	7.91171	8.06725	7.9175	7.81711	10.1824	7.91204	7.86421	8.94302	7.88999	8.60814	7.94896	9.60441	7.91273	7.85257	10.081	7.90306	7.92007	9.3326	7.87367	8.2233	7.88339	7.89246	8.05978	7.86283	7.86077	9.95934	7.99371	7.85044	7.9467	7.90302	9.94908	8.22526	7.92144	11.6361	9.32709	9.17324
FASLG	7.89374	7.86108	7.97452	7.86133	7.85661	7.84227	7.8876	7.87989	7.863	7.83421	7.86092	7.87488	8.08259	7.85823	7.87612	8.57567	7.84747	7.87053	7.84113	7.83436	7.86036	7.87624	7.87087	7.85613	7.89511	7.83476	8.49958	7.90212	7.92242	7.87889	7.91473	8.19763	7.89759	7.87283	7.9027	7.84198	7.84848
FBLN2	8.26084	9.24182	9.30494	9.97629	9.23393	8.43835	9.04133	9.61285	8.80707	9.99971	10.4493	8.76917	9.42569	10.6052	9.36664	9.3845	8.71975	8.94052	9.71229	8.86677	8.56208	10.1522	10.4976	9.21222	10.3747	10.2534	9.72094	9.5473	8.53077	8.76894	8.98084	9.23304	9.13155	9.56861	9.52937	10.6261	10.8683
FCGR2A	8.09911	8.322	8.07318	8.16943	8.469	9.6163	8.92512	8.85446	8.53233	8.59696	8.21337	9.20371	7.90265	9.2563	8.33973	8.02284	8.0516	9.27387	8.97257	8.32559	9.10914	9.20171	8.11876	8.4927	9.01592	9.38382	8.58871	8.63314	9.57553	9.13059	8.48844	8.95211	10.0346	8.43769	8.30403	8.92083	8.59665
FCGR2B	7.91865	7.91478	7.87136	7.97989	7.90123	8.17739	8.0936	7.98998	7.94452	7.94245	7.91829	7.94896	7.91094	9.049	8.02515	7.93009	8.02309	10.232	8.92499	8.57429	9.36965	8.46098	9.07849	8.28713	8.13352	8.11317	7.97383	7.97784	8.68252	8.9124	8.56696	9.18378	8.21093	8.39627	7.88072	9.97842	9.27807
FMO1	7.86498	7.8949	8.07973	7.8869	8.01702	7.86833	7.94151	7.85037	7.98878	7.85613	7.86317	7.85213	7.94914	7.87731	7.8571	7.87656	7.9765	7.86369	7.86939	7.8952	9.73008	7.87369	7.87419	7.90387	7.95191	7.88995	7.87497	7.88158	7.90661	9.19329	8.1483	7.87659	7.96368	7.86187	8.10306	8.60791	7.81891
FOXF1	8.12592	7.835	7.85344	7.94151	8.40995	8.14568	8.88309	7.87246	7.92761	8.82623	8.12896	7.86917	7.88977	8.15261	7.91222	7.92836	7.90057	7.97607	8.0257	8.18179	7.88567	9.66935	8.39025	7.90564	7.91065	8.03217	7.93262	7.85576	8.14662	7.91032	8.37299	7.92233	8.37567	8.19284	7.91151	7.96363	8.67329
FPR1	8.0445	7.91171	7.89832	8.57784	7.92922	8.50582	9.65153	8.21559	8.86093	7.87028	8.07985	7.94184	8.74904	9.2282	8.97365	8.85505	8.12898	8.49464	8.26558	11.3515	10.1101	9.41993	8.43663	7.88303	8.90051	8.50376	8.65399	9.77057	8.66567	8.22093	9.84409	8.14648	9.45925	9.12656	9.36031	8.28228	10.8915
FRZB	7.99643	8.35586	9.15986	10.6668	9.44808	9.02597	9.22121	9.099	9.02956	10.4958	11.1869	8.84387	9.54238	9.38599	8.91665	9.38836	9.44773	9.5395	8.12069	10.4005	9.43342	9.03129	8.96994	9.79313	8.54444	8.32014	8.2353	10.2887	10.1233	9.1291	9.399	8.73221	11.0121	10.1981	9.99571	8.61224	10.1122
GIMAP5	7.93906	7.95167	8.10259	8.20135	9.46043	8.30337	9.40175	9.48881	8.63101	9.30026	8.57929	8.32965	8.7038	9.02857	8.42398	8.98452	8.91294	8.49036	8.74488	9.38232	8.29086	9.03129	8.12448	9.56214	9.55622	9.76252	8.2085	10.3274	9.98767	10.0747	9.31991	8.94565	9.60178	8.81645	9.9086	9.36604	12.5398
GPR124	8.82901	9.26825	7.97452	13.6415	11.185	12.281	12.791	10.8333	8.92212	9.57006	13.267	7.89749	11.0791	7.90279	12.3242	11.9257	8.75513	12.6321	13.0451	8.9667	14.7726	13.5323	13.5457	10.9206	13.0297	12.0744	10.4566	14.4812	8.5734	11.4841	10.8213	13.0349	13.1293	7.92979	9.82485	13.65	8.1702
GREM1	8.00632	7.88669	7.89031	8.37217	7.99788	8.39203	9.2223	8.62099	7.94632	8.68195	8.04421	7.88038	8.45476	8.11546	8.06145	8.22552	8.26497	8.3499	8.20973	9.79635	8.75025	9.08366	8.62596	9.7207	8.67545	8.40757	8.39519	9.36579	10.5538	9.09282	8.39673	9.42512	8.19638	8.81095	9.06952	8.58289	8.11126
HDC	8.49547	8.6179	7.90052	11.7912	9.75363	10.8371	9.15509	9.2655	9.66144	9.30026	11.3039	7.88269	8.82573	8.22447	10.377	9.0826	8.05208	11.3555	9.17969	13.6169	7.9392	9.143	8.20575	12.3694	8.63044	10.4306	10.9161	12.6807	14.5907	10.1862	10.583	11.7055	9.01371	10.8564	10.0853	11.666	13.1844
HEPH	8.02721	7.85416	7.86486	8.43981	8.27347	8.53962	8.18371	8.09754	8.75532	7.88049	8.43108	7.93343	7.97977	7.85264	7.85507	7.83546	10.7675	8.82499	8.51707	7.8827	7.93695	9.22118	9.13818	7.93341	8.37078	8.34136	7.85062	7.85112	7.91568	9.77297	7.8411	8.53178	7.91533	7.85018	8.72244	8.67068	9.8494
HGF	8.52261	9.13251	8.79721	8.71358	8.31786	8.54044	8.41831	8.6064	8.29881	8.43025	8.35515	9.0496	8.28824	8.55057	8.38093	8.51226	8.00822	7.98217	8.51184	10.8894	8.78297	8.28769	8.52348	8.62314	8.62255	9.30872	8.11284	8.35306	8.33653	8.20726	8.45314	8.76687	8.40857	8.22152	8.0734	8.67101	8.57457
IGF1	7.859	7.85808	7.86088	7.89794	7.87891	8.41813	8.24718	8.36411	8.39569	7.99054	8.03119	7.90784	7.86857	9.09348	7.90079	7.91841	8.01274	8.50036	8.59791	7.95237	8.0442	8.86413	8.2594	8.06628	8.06284	9.19558	9.13316	7.94425	8.09256	9.03157	8.02716	8.10712	9.46597	9.04242	9.58108	10.3224	10.0886
IGSF6	8.01439	7.90053	7.89832	8.61224	7.90382	8.24666	9.31317	8.51432	9.34403	7.87492	7.98327	8.16481	9.14691	9.43163	8.75975	8.83996	7.81473	8.45441	8.43907	10.753	8.95288	9.13097	8.24753	10.5567	8.83381	8.81033	9.06087	9.44663	8.33248	8.74846	9.64528	8.27845	9.96512	9.05035	9.39612	8.29596	10.1122
IL18R1	8.39717	7.94636	8.14529	7.94343	9.63454	9.79127	7.90246	9.05094	8.37158	8.90701	9.69412	7.97163	9.61505	7.85823	10.287	9.75263	9.61924	9.44995	9.03683	8.87279	8.34107	7.87443	7.90347	8.24692	8.1002	9.42146	10.6845	8.18531	7.95391	9.01975	8.08018	7.88496	7.8709	10.4221	7.86392	7.81845	8.39821
IL1B	8.19553	7.97662	8.29157	8.00303	8.27502	7.85204	7.88647	7.93618	7.94723	7.94608	8.68681	12.6219	8.02725	8.31795	8.0283	7.92012	7.90057	9.7743	9.64	8.65577	8.34107	11.2924	11.0558	9.46909	7.97197	7.87694	7.98123	8.03882	7.86396	7.90924	8.00071	9.64482	7.89144	11.5778	8.43841	9.11354	8.14231
ISLR	7.87254	7.8402	7.93209	7.87531	8.72296	7.90028	8.19293	8.42369	7.89899	8.09607	8.09219	8.51984	7.87755	8.1058	8.85973	8.00101	7.85328	7.92022	9.29127	8.13903	7.87331	7.91187	7.89401	7.96907	8.77955	10.1014	7.87544	9.8047	8.41977	8.43235	8.76232	8.84749	8.2163	9.92963	7.96838	7.89511	8.24099
ITGAM	8.02232	8.84248	7.91385	8.10188	7.89429	8.40453	8.62862	8.23487	8.09901	8.57411	8.24587	8.75828	7.86697	8.19657	8.38647	8.13705	8.14172	8.36135	8.17478	8.34514	8.15975	8.2894	8.28765	8.30131	8.28504	9.1908	9.46922	8.5949	7.8827	8.1706	9.58754	9.23817	7.86813	8.0111	8.62774	8.82839	7.9477
ITGBL1	8.04531	10.1794	9.34008	8.46442	8.74359	8.62653	8.65245	8.25919	7.94198	8.62791	8.04535	9.51048	8.21818	8.88453	9.14004	8.32483	7.9678	8.55357	8.21762	9.75713	12.7897	8.86057	9.25253	12.4246	9.01865	8.51555	8.92549	8.93666	10.62	8.34503	10.8208	9.28197	10.5156	9.30449	9.71432	8.47588	9.46604
ITIH3	7.94417	8.17631	8.33722	8.01769	7.95069	8.07413	8.70422	7.93308	9.08175	7.89832	7.9462	8.14157	7.94531	8.07572	8.0117	8.13892	9.52657	8.01252	7.93487	8.36214	8.02732	8.40399	8.10408	8.47003	8.28504	7.91674	8.16374	7.97283	9.37903	8.10855	7.97697	7.9196	8.19696	8.45332	9.22019	7.96914	8.39821
ITIH5	8.48285	10.3861	10.1651	9.17577	9.28681	9.51677	9.2753	9.20574	10.5756	9.79096	9.14111	9.47337	9.28741	9.29833	9.26381	9.22859	10.3626	9.50568	9.16803	9.49137	9.88789	9.84378	9.34157	9.66569	9.29841	9.20597	9.44249	9.85634	9.40945	9.33462	9.60787	9.18317	9.41544	9.81825	9.43766	9.38754	9.30899
ITM2A	8.31005	9.01506	11.5564	11.9788	10.5369	9.11066	9.35346	10.9579	9.65689	11.0205	10.2846	9.15991	9.59766	11.0768	10.2185	8.74098	9.55164	9.75107	8.7288	11.7404	8.42338	8.97999	9.0317	10.9761	9.62798	12.1929	10.8344	11.8125	9.77904	10.9963	11.0253	9.61978	10.5789	9.98497	11.0717	10.9589	10.7021
KCNJ8	7.86157	7.98627	7.96654	7.85891	7.88753	7.94514	8.02327	9.0916	7.90878	7.94245	11.4303	8.13023	8.17621	8.05331	7.91009	7.87935	8.10447	9.75103	9.41248	8.04913	7.89749	8.95432	10.1164	7.86607	10.8429	7.94649	7.95363	7.89322	8.34962	9.77249	7.94993	9.32459	9.09052	7.91533	8.75619	10.7095	8.07332
KDR	7.94643	8.20519	7.94012	8.13444	8.27502	8.77139	7.9367	8.80592	8.4143	8.45918	8.12885	10.1255	7.92198	8.87709	9.21752	7.87024	13.7176	8.20749	7.91699	8.3803	7.91259	7.92234	8.49344	8.10892	8.00167	7.92235	7.99838	8.67543	8.02705	7.93937	7.93429	8.33264	7.88316	7.92144	8.05259	8.4382	7.84427
LDB2	7.99185	8.47378	8.42656	10.6211	8.75627	8.28659	9.18072	11.4465	9.55017	9.36728	11.0827	8.72811	9.63679	9.1713	8.58007	9.70154	9.35294	10.7196	10.7482	9.69945	9.13942	10.9095	10.6977	9.78147	10.5363	8.60669	8.28945	9.02394	9.89788	11.3883	8.6465	11.9181	9.71634	10.3851	10.293	10.9018	13.3855
LMOD1	7.92262	7.98758	8.71056	9.82951	9.35282	9.60092	11.5529	7.90669	7.90709	13.7026	7.84538	8.17237	9.90657	7.93229	9.93935	10.5698	10.8195	9.43139	8.96122	7.90686	7.88246	8.19438	9.08509	7.88804	7.88118	7.87293	7.91397	7.94415	7.89582	7.89813	8.08018	9.39849	7.88161	10.4357	7.88912	7.90141	7.8698
LPPR4	7.89	7.91625	7.90559	9.04133	7.90246	7.84227	8.07535	8.15165	7.91401	7.88713	9.20658	7.88113	7.90388	7.86872	7.84858	7.84971	8.26124	9.14856	8.28217	7.84458	7.84033	9.87912	9.63047	8.18667	8.62854	7.87293	8.4135	10.9371	7.94674	10.3841	9.54324	8.27816	7.8602	7.87562	7.92714	9.22041	7.97956
LRRC15	8.16102	8.22326	8.47493	9.3432	13.1026	9.91658	10.2091	9.5205	9.46543	10.6519	9.38992	9.63828	12.5283	10.5957	9.92841	10.5742	10.2225	9.49332	10.5037	11.7173	9.7694	10.4336	9.98611	12.4431	10.2985	9.6652	9.84904	10.3781	10.8281	9.83481	11.2258	11.0018	10.84	9.67479	10.0641	10.0597	11.3497
LRRC32	9.22391	9.04261	8.1132	12.6842	8.3997	11.9919	7.95222	12.305	10.3514	7.94245	11.9387	12.7897	12.1312	12.6883	9.14209	12.678	7.88845	12.939	13.378	9.61124	8.79573	11.3619	13.1737	9.44827	13.8412	12.3147	12.1283	8.47474	8.71652	12.4625	7.98599	14.0405	8.31639	11.6312	12.9813	13.2277	13.9552
LUM	8.38243	8.37601	8.05377	10.1032	9.45368	11.3095	11.578	10.6171	9.60543	10.8256	12.4992	9.3246	9.58396	10.6994	10.41	10.0763	12.1443	10.852	10.6379	7.89241	9.48382	10.8715	11.276	11.0581	10.9565	10.2734	11.5019	9.13213	9.871	11.6843	12.0481	10.1352	11.3218	10.4352	9.57903	10.6869	8.5343
LY86	8.10395	8.05876	10.4838	9.1474	10.2355	8.43136	9.41441	9.39273	8.11127	10.3942	9.12243	8.24651	9.15283	9.5395	8.81637	8.83076	11.5339	9.18602	10.1504	11.0953	7.87735	10.2816	9.70806	10.5494	8.8821	10.3775	8.52988	10.9474	10.7478	10.8126	10.0468	10.2647	10.1377	8.99175	9.4941	10.541	10.4992
MAF	7.98772	8.31152	7.89683	8.30405	7.97007	8.26591	7.91871	10.0445	7.94735	8.07721	10.1454	8.70448	8.09613	8.76247	8.93321	8.20421	10.3741	9.96356	9.7897	7.83066	8.75263	8.72964	9.13653	7.90763	9.96978	9.9037	9.17909	8.05998	7.84686	9.28145	9.2544	9.53817	9.09022	9.59844	8.83128	9.20848	9.57322
MFAP5	8.22674	9.33248	11.2253	12.1102	12.0053	10.2106	9.4547	11.4694	11.0059	14.2707	8.04398	11.7223	8.45296	11.1286	12.6855	8.24049	12.7089	11.9195	11.9895	10.9908	11.6447	9.31593	10.7861	13.9584	10.5517	12.1412	12.9606	10.1615	11.9038	9.04674	12.7255	13.699	13.9441	12.422	13.3584	13.1882	14.0989
MMP3	7.90811	7.86431	7.88794	9.26497	13.6807	8.91685	9.00546	7.92276	8.86093	7.93255	10.097	7.89292	7.94914	11.4378	10.7983	8.17197	10.6547	8.02984	11.0138	7.90916	7.96433	8.5637	9.09555	8.05096	9.29461	8.93122	10.0703	9.00947	7.9201	8.04972	10.8536	10.2312	9.20634	11.4808	12.2053	11.5304	12.2324
MS4A4A	8.05177	8.0719	9.2381	8.80152	9.25178	9.31624	9.30157	9.20215	9.62403	9.3907	8.85021	8.60077	9.31682	9.0426	9.5958	9.15957	8.51974	9.37283	8.876	9.91755	8.84002	9.33206	9.21186	8.87906	9.10298	9.70231	9.06716	9.68329	8.36034	9.6927	8.73323	9.53526	9.48014	8.93391	9.43465	9.53892	9.43544
MS4A6A	7.91385	7.98991	8.03551	8.82701	8.10552	9.18421	9.25749	9.28788	8.59064	8.24319	9.02073	9.56701	7.89791	8.28676	8.10121	7.91376	8.4496	8.82506	9.68065	8.46071	10.6108	9.09673	9.06407	8.53852	8.67137	9.69754	8.52718	8.06651	8.28424	10.485	8.33556	9.73493	9.86621	8.11373	8.24653	9.84298	8.22474
MSR1	7.94994	7.9816	8.10379	8.05158	8.05119	8.48278	8.91466	8.55709	8.29039	8.31764	7.95027	9.50348	7.99661	8.58889	8.59578	8.27267	8.4221	8.78907	8.65356	9.33552	8.66895	8.52891	8.13145	8.32154	8.89916	8.76189	8.18051	9.56122	9.71514	9.17676	8.59978	8.63828	9.82302	9.01486	8.79611	8.29232	9.14051
MXRA5	9.52183	10.3678	7.87454	14.1283	11.4598	13.426	8.42038	13.938	11.3289	11.3292	14.2386	13.886	11.4328	13.2587	12.0479	11.9205	8.28293	13.3661	14.3567	10.3032	11.4201	14.1265	13.9526	14.082	14.2407	14.1924	13.5579	13.197	11.8886	14.3599	13.6478	13.7708	13.4113	13.3319	12.6355	14.3146	14.0006
NOX4	7.88532	8.04518	7.92812	9.31885	8.21582	9.45621	7.91946	8.96364	8.63689	8.47706	8.79921	9.2228	8.61143	9.05354	8.64675	8.79303	8.07262	10.1066	9.17031	8.2324	8.06289	8.39924	8.88976	7.95966	9.69265	9.25203	9.27026	7.89239	7.93128	9.41013	7.99123	10.7178	8.0437	9.01287	9.14614	9.85186	8.05769
ODZ4	7.87245	14.0792	12.0549	8.06319	10.4033	7.90905	7.88878	10.9808	10.2641	9.26749	10.2859	7.88563	8.79225	8	10.9992	9.03767	8.05208	7.88563	10.5075	7.95045	10.9495	10.2575	10.4982	8.21499	8.79008	8.45658	9.79954	7.91267	7.87622	11.0875	9.4555	11.9347	7.88795	8.34158	7.90965	10.3283	8.17682
OLFML1	8.90185	8.84359	7.88794	10.7014	11.6084	10.7154	11.3942	10.4159	11.1588	10.5465	12.1077	7.86041	11.8072	12.2583	11.7157	11.4417	7.87825	11.0399	10.3656	7.87256	8.95288	11.7212	11.6698	10.9285	11.3281	10.79	13.028	10.0959	8.90713	12.5611	12.208	12.3175	9.60178	11.1207	10.8536	11.6549	12.5621
OLFML2B	9.60651	9.69548	10.1343	13.6547	12.1883	13.4381	12.4701	14.5783	10.95	11.3265	14.4111	13.96	12.8078	13.6383	13.1364	13.2986	9.65692	12.658	14.3672	10.6072	11.3858	13.6243	14.1553	11.2232	13.4297	13.8363	13.2015	13.1872	10.219	14.1144	13.8274	13.8078	9.54985	12.323	12.9158	14.2535	13.6117
PAPPA	8.4548	8.03249	8.71056	7.9356	7.86284	7.93855	8.48536	8.87427	8.64319	8.55333	8.90596	8.00573	9.53883	7.95656	8.37775	9.30963	8.64238	9.96453	7.90516	8.11389	8.05762	8.95805	9.71297	12.0958	8.02017	8.0419	7.96914	9.18697	13.8888	7.98012	9.09666	8.26162	8.8333	9.91232	9.84591	8.63585	8.57856
PCDH12	8.19633	14.0763	12.411	10.1044	10.1794	10.9075	9.03443	9.6762	7.93427	14.2222	8.8211	8.54604	9.89914	8.76648	10.3664	10.0688	11.6153	8.06115	9.73064	8.36214	8.2443	9.09119	9.8377	7.93346	11.3537	9.7109	8.34627	8.15216	8.00542	10.084	8.62401	9.94875	8.70062	8.17106	11.8326	9.32795	10.1053
PDE2A	9.36129	8.31292	7.89832	9.31434	8.49053	8.112	8.42038	7.8651	7.84505	8.08476	8.156	7.84403	7.94147	8.59362	8.14919	8.62285	7.88688	8.02768	8.03677	8.60662	7.85225	8.16574	8.27773	7.87373	7.92321	8.06999	8.00831	8.10892	8.33248	8.39143	8.63908	7.94372	7.98643	8.30354	7.86479	8.0089	8.90959
PDGFRB	9.76411	13.664	13.0273	13.4381	11.0659	12.5919	11.3242	13.5435	10.9082	11.2439	13.7789	12.1679	11.5583	9.31932	11.512	11.6828	8.33442	12.5172	12.9066	13.3645	8.14689	12.9743	13.699	13.8018	13.0643	12.9933	12.9296	12.9147	11.7264	13.4185	12.697	14.016	8.19696	12.2442	12.5336	13.1403	12.5378
PIK3R5	7.87483	7.87761	7.87454	8.13727	8.3167	8.18384	9.21578	7.9645	8.22904	10.0062	7.95103	7.91385	13.8519	9.08085	8.22567	8.76027	8.28293	8.19398	7.99296	10.7275	7.87082	8.85652	8.07653	9.19448	8.24987	8.16214	8.12193	8.10359	9.19105	8.37049	8.63908	8.15041	8.25709	8.7409	8.21238	8.10621	9.43504
PLXDC1	7.90071	10.6217	10.5598	8.14837	10.8647	8.30196	9.38096	8.3853	9.9245	9.95934	8.02573	8.73753	7.9087	8.66288	9.09774	8.06294	11.0016	8.50467	8.10186	10.0271	11.0498	9.75779	8.4046	9.10753	8.48361	8.54916	8.19902	10.5801	9.70591	8.36396	9.68445	8.0367	10.4633	9.31033	7.98252	8.08328	9.43504
PLXNC1	7.85941	7.87293	7.87778	7.86416	7.8968	8.96515	7.94695	7.8318	7.84031	8.55333	7.85208	10.2513	7.96165	7.91273	7.86366	7.88368	8.48395	7.89617	7.83026	7.86235	7.84792	7.83958	7.82265	7.89262	7.85551	7.85083	7.82558	7.8779	7.86055	7.87539	7.94151	7.87791	7.88964	7.89828	7.88072	7.84756	8.09102
PRKG1	7.8724	7.87624	7.89416	8.02061	8.10177	8.00427	8.24682	7.90639	8.22877	8.33419	7.91627	8.4469	8.08774	8.51051	8.19958	7.90495	8.29896	7.99643	7.94575	8.53341	9.30077	8.30994	7.90269	8.56876	8.01075	7.91041	7.9728	8.34555	8.39699	7.99434	8.44447	7.95312	8.46904	8.20417	8.04629	7.89755	8.88751
PTGER3	7.85943	7.9416	8.19076	7.87414	8.10711	8.24265	8.11453	7.87885	8.82322	8.10731	7.94549	8.42165	8.48083	8.17998	7.9873	8.50302	8.39139	7.92701	7.89652	8.20512	8.48307	7.95429	7.89758	8.59964	7.93472	7.90975	8.25169	8.83559	9.14148	8.06429	8.50405	8.2737	8.08282	8.05295	8.58156	7.94722	8.8879
PTGIS	7.92361	7.92818	7.94939	10.338	7.89902	9.58475	8.04847	9.3842	7.88161	7.85419	9.90772	7.88405	9.07955	7.87203	7.90781	9.59732	7.88513	9.40209	8.93285	7.98773	7.88756	8.59809	9.70569	7.88427	7.91357	7.98273	9.6399	7.8504	8.90713	7.88915	7.92179	10.588	7.85253	10.3775	7.84594	9.36233	7.89552
RAMP3	7.89561	7.88915	7.89985	7.91082	7.97702	7.94844	8.07606	8.04914	9.30558	7.97821	8.05553	10.6198	7.8747	8.29874	7.99856	7.89669	7.90033	8.0038	7.92726	8.24211	9.19777	8.04894	7.94638	7.92099	7.92754	8.00051	7.93692	7.9913	8.69517	8.4346	8.05944	7.94721	8.14587	9.55737	7.87305	8.4296	7.90823
RARRES2	8.19077	8.09816	7.9282	8.54663	7.90123	8.45714	7.96662	7.93308	8.52649	10.2347	11.9079	9.50546	7.93117	8.12385	8.22322	8.22456	8.91294	8.65431	9.87878	8.10656	10.0451	11.0782	10.0147	8.73305	8.39735	8.34317	10.0749	8.03882	10.1914	9.956	10.4461	9.41802	8.959	9.04939	10.2378	11.3091	13.4014
RASGRP3	7.92297	8.14873	7.85731	10.7611	8.14595	10.9139	7.94151	11.4648	7.88044	9.1519	10.257	7.90774	8.86806	11.1232	9.71325	9.2015	7.84325	9.75183	10.0325	7.90916	7.87454	9.39127	9.85541	11.8138	8.76323	10.8055	8.80689	11.4224	13.8151	11.0335	9.93445	10.6735	8.03156	9.04873	7.96632	11.2232	7.92591
RGS4	7.97451	7.95484	9.40231	8.10188	8.07837	9.41219	7.9494	7.93346	8.76924	8.71007	8.21238	9.29028	9.08938	8.37112	8.34461	9.31033	10.483	9.49511	8.86588	8.9667	10.3208	7.89119	8.14272	8.45544	8.21093	7.99338	8.09276	8.56611	8.13049	7.96349	8.01323	10.6697	7.9438	8.55693	8.19333	7.92219	8.04948
RSAD2	8.13931	12.5484	12.3869	10.4282	9.71852	7.92866	7.90408	8.097	8.6984	8.77605	8.56395	11.0777	10.2895	8.84638	10.2086	10.4093	9.52657	7.99144	9.38769	8.16316	8.17246	8.16012	8.03471	8.31598	11.1831	9.22068	9.85645	8.46394	9.20302	10.0831	8.16266	7.92767	9.07894	8.10512	8.96598	7.98273	8.17682
RUNX1T1	8.05212	7.99941	8.22039	8.31817	9.13385	8.67387	8.45053	8.18552	8.58723	8.41582	9.49319	9.83115	8.49135	8.48926	9.36137	8.38847	9.40634	8.15071	8.62888	8.33362	8.66521	7.99213	8.28171	8.15588	9.00739	8.45784	9.3772	8.25867	8.15798	8.76305	8.07361	8.74053	8.84106	8.62905	8.66117	9.25401	8.61713
SAMSN1	7.98976	7.91855	9.34069	8.58712	8.88576	8.16806	8.72028	8.27008	9.12433	9.26878	8.1762	9.3552	8.63582	8.63703	8.61095	8.53332	8.94205	8.18944	8.35507	9.37147	7.89134	9.38554	8.51986	9.29553	8.47174	8.89025	8.18268	8.67344	8.74681	9.10957	8.88882	8.30565	9.17465	8.61181	9.12029	8.33594	9.65714
SCUBE2	7.86418	8.3306	7.88605	9.20433	7.91593	7.9001	7.88519	10.0325	10.069	9.00037	9.9966	7.92596	9.06874	7.9067	7.87825	9.56936	7.88513	9.47081	8.90418	7.88803	7.87583	8.92823	10.2332	7.89405	11.255	8.17269	11.1544	7.93619	8.40382	8.08356	7.89221	10.9354	8.17228	7.953	11.029	10.1916	8.72157
SERPING1	7.9266	7.93713	8.30353	8.11426	8.49578	8.18754	9.79544	8.53951	8.28203	8.41092	8.28515	8.89117	8.00292	8.52979	8.84108	7.99913	8.96538	8.13074	8.63619	9.09869	11.3594	8.54169	8.41763	8.58522	8.25965	8.54481	8.50124	8.57455	8.86966	8.84762	8.52275	8.37262	8.66313	9.26025	8.94764	8.05988	11.0964
SFRP4	8.33832	8.76667	8.78933	9.69994	10.7646	10.2669	11.8382	9.6344	11.3267	10.5935	9.67125	10.9542	9.6953	10.2131	11.3592	9.745	12.2067	9.67288	10.7438	11.5004	10.6847	8.83736	10.3997	8.67093	9.96946	9.98339	9.97073	10.3304	8.66785	10.2745	10.3424	10.3541	11.1958	10.847	11.7475	10.9636	13.0829
SGCD	7.87328	7.88804	7.87972	7.88612	8.0202	8.87401	7.87666	9.01843	7.94698	7.9168	8.67344	9.35037	7.86409	7.84522	8.35702	7.85607	7.88319	8.11621	8.54933	7.87541	7.9368	8.60441	8.94706	7.97692	8.65364	8.20545	9.03724	8.69612	8.0053	8.16456	7.95394	8.45806	7.86955	7.87656	8.4806	8.78957	7.86949
SH2D1A	8.06109	8.22866	8.7308	8.47869	8.79369	8.26224	8.99018	8.22108	8.96681	9.36728	8.00916	10.4153	8.76938	9.36872	8.77903	8.11281	9.74726	8.29098	8.15125	10.3654	9.16329	8.80121	8.27667	9.88626	8.6238	8.32509	8.53357	9.33851	9.17902	8.16366	9.21051	8.09047	9.35767	8.60321	9.44357	8.21604	9.18822
SIGLEC1	7.86306	7.88162	7.91094	7.86834	8.73025	7.91798	7.93175	7.8857	7.89556	7.86035	7.85714	8.09904	9.78737	7.85346	9.37249	10.3075	7.89448	7.96765	7.8355	8.13826	8.90279	7.91679	7.83363	7.91112	7.97352	7.87738	7.86962	7.91664	7.87733	8.96193	7.92789	8.79476	12.5633	8.00122	7.96176	9.34022	7.94513
SP140	7.94733	8.97825	8.49205	7.97762	8.21919	9.13398	8.3476	8.16402	8.14843	8.59028	8.22347	9.06909	7.91836	8.23811	8.10638	8.0134	8.18461	8.68252	8.32378	8.51923	8.47909	8.04466	8.04783	8.25132	8.09492	8.09024	8.01816	8.15967	7.95575	8.77025	8.45439	8.06247	8.72075	8.18342	8.01244	8.30038	8.43985
SPON1	8.17121	8.39342	8.31456	11.3078	9.71852	8.00495	8.21263	9.60333	9.76067	9.32665	11.7826	13.3555	8.39899	11.384	10.1493	7.93382	8.16903	10.3309	11.3963	9.51316	8.20409	9.53987	11.7523	8.56823	10.6954	11.1439	11.2891	9.32184	7.9201	8.82116	11.1618	10.3587	9.02505	8.12085	12.784	12.0796	13.8306
SPON2	7.85044	13.7343	12.3488	7.86799	9.86728	7.84988	7.87137	8.02643	7.88044	7.86573	8.75505	7.78627	7.86041	7.8421	10.2583	7.83488	7.88688	7.87053	7.84545	7.8614	7.87204	7.8487	7.89315	7.82133	8.83996	10.6651	8.13173	7.85883	7.86396	9.16499	7.88493	9.53456	7.84121	10.9667	11.2064	9.19521	9.01566
SULF1	8.04141	7.91007	8.57327	9.05802	7.9689	7.99592	8.06451	9.01411	7.89052	8.92251	9.20254	8.17237	8.18925	8.10968	8.28135	8.27203	8.11676	7.88733	8.74572	8.93386	8.95288	7.93655	7.9866	8.49667	9.11756	8.03687	7.9042	8.46394	8.42331	9.30286	8.28362	9.07856	8.08999	8.19794	8.81072	8.40474	7.93009
TCF21	7.92714	8.29286	7.9786	8.03477	8.07743	8.51379	8.8259	7.98348	8.16338	9.15978	7.95309	8.2677	9.00347	8.27055	8.03632	9.33371	8.41456	8.1353	8.03976	9.42388	11.2797	8.07128	8.00086	8.67109	8.25779	8.18379	8.25612	9.11287	9.55313	8.06227	8.08666	8.2081	9.03184	8.51013	8.14851	8.02576	8.44267
TFEC	7.92402	8.03416	8.243	8.09791	8.15705	8.22224	8.42057	8.1413	8.44051	9.04228	7.94792	8.38025	8.16566	8.53017	8.30094	7.97515	9.21336	8.04945	7.96614	9.2054	8.6923	8.38022	8.01617	9.02222	8.20002	8.11248	8.40757	8.50521	9.30596	8.08368	8.53383	7.96469	8.73327	8.31349	8.48169	7.99331	8.89258
THBS2	8.44431	14.148	12.0937	8.19398	11.8623	13.5017	12.1781	11.5038	11.0151	11.2542	14.6204	13.2174	11.3281	10.1068	13.0313	12.4168	13.1708	12.6634	13.3825	9.73823	9.18505	11.9681	13.1221	10.5458	14.161	12.9718	13.6547	10.1553	10.0554	12.8321	13.9214	13.2157	12.7821	13.381	13.9355	12.1568	10.9032
TLR2	7.84896	13.5607	12.4155	7.86753	7.84629	7.90106	7.83842	7.90146	7.85586	8.04386	7.86718	7.87546	9.14691	7.86055	7.88676	9.65499	7.82341	7.88303	7.90516	7.87071	7.88567	7.84946	7.86429	7.84288	7.82538	9.17831	8.1107	7.83571	7.84505	7.8246	7.94151	8.55362	7.82543	7.85139	7.84121	7.85969	7.87819
TLR7	7.83886	7.9139	7.96013	8.95311	7.88114	7.8816	7.87743	8.54147	7.87939	7.89832	8.27164	7.88405	8.14118	7.9067	7.84269	7.85979	8.05208	7.87809	9.09804	7.8717	8.97863	10.7923	8.31423	8.72166	8.13046	9.86681	7.87689	8.07568	7.9201	9.47734	7.97697	9.19203	8.14902	7.91385	7.87338	9.50705	7.86889
TNFSF4	8.24143	7.88771	7.93907	8.10594	8.5899	8.06484	8.16864	8.8393	7.90669	7.87929	8.54448	8.72837	8.02107	7.90839	8.27742	8.01534	7.86171	8.10681	8.01754	8.2236	7.8711	7.88463	8.05013	8.13699	7.92099	8.71556	8.03792	7.88342	8.88543	8.36409	8.01164	8.59926	7.89324	7.87765	7.86501	8.01317	7.99403
TNN	7.90705	9.03607	7.84682	10.8193	8.20575	7.89748	7.83084	10.3032	11.4002	8.75898	11.4295	7.86917	9.62041	7.93767	8.07156	9.75337	7.86876	10.4075	10.7331	7.91306	14.7426	8.10463	9.369	7.92039	10.4893	8.35966	13.664	12.2674	7.92504	9.96814	10.2954	8.93973	7.89988	10.5655	7.93877	10.8434	7.9842
TRAT1	7.91573	10.2825	10.6457	7.98757	8.24749	8.07334	8.35931	7.98093	8.80284	8.88767	7.94514	10.3126	8.98485	8.50908	8.17307	8.93793	9.82235	8.20185	7.97356	9.99776	9.14508	8.21999	8.01771	9.32756	8.14194	8.02407	8.15326	8.80711	8.48726	8.01885	8.60261	7.92841	8.80214	8.2515	8.78632	7.99409	9.08533
TXNDC3	7.98156	8.19708	8.1565	8.50279	7.91593	8.42307	9.39172	8.15982	10.5541	7.91032	8.02153	9.66431	8.87936	9.54696	8.89899	8.09475	8.11676	8.54823	8.1759	8.16316	7.92662	9.02008	8.27211	10.7854	8.77303	8.57066	8.41657	9.47459	10.918	8.17955	9.86345	8.07558	10.1032	9.19448	9.63414	8.13496	10.5432
VCAM1	8.66978	8.51728	8.11556	10.1163	8.75428	10.6001	10.0603	10.2861	9.16673	8.99608	10.4675	8.0809	10.3745	10.2501	8.88008	10.4392	9.29711	10.1852	9.91271	11.6705	10.9709	10.1477	10.9718	11.4219	10.5636	10.6502	9.71229	11.1019	11.6558	11.5261	10.6742	10.4218	10.5186	9.25581	9.8091	10.4985	10.4205
VSIG4	7.94147	8.00559	8.38096	8.11113	9.22121	8.17488	9.12057	8.27612	8.81771	9.87977	7.9593	9.76649	7.87541	8.53931	8.1768	8.01769	9.72869	8.57429	8.25919	9.60023	8.84823	8.5637	8.40891	8.47003	8.23471	8.73424	8.13026	8.22971	9.75242	8.34954	8.52172	8.2308	9.37713	8.39627	8.3435	8.35966	9.69854
WISP1	7.95868	7.84082	7.95068	8.96633	8.07218	7.97611	8.51315	8.51404	8.62676	8.04864	8.01604	9.02966	8.22729	9.11375	7.90895	8.13969	11.8861	8.32973	8.32772	8.44639	8.22713	8.92953	8.63786	8.48472	7.91071	8.60575	7.89761	7.96321	7.89296	8.514	7.95115	8.4112	8.45773	8.76698	7.98384	8.06742	8.69343
WNT2	7.98917	8.24059	10.4571	8.34719	10.095	8.35342	9.44049	8.17624	9.497	10.2216	7.96815	9.18649	8.15048	9.58261	8.78787	8.13743	10.5684	8.33325	8.17478	10.6763	9.9918	9.17256	8.65254	10.0817	8.50897	8.37852	8.36773	9.2605	10.426	8.16311	9.43301	8.26237	9.7743	8.97787	9.30878	8.21535	10.5617
ZEB2	8.34899	7.8884	7.87454	8.5953	7.87351	8.45658	8.39418	8.25049	8.8265	8.61116	8.3527	9.38571	7.94531	9.65631	8.23451	8.19215	7.94449	8.49526	8.26869	8.57429	7.86172	9.34931	8.40036	7.90927	8.87602	8.8223	9.35847	7.88396	7.88667	8.576	8.35428	8.19996	8.71877	9.08994	9.52792	8.65927	10.9583
ZFPM2	8.02907	9.60281	10.1819	8.03928	8.10071	8.32561	9.64063	8.16898	7.98878	8.8757	8.10772	9.46516	8.5467	8.54458	8.23451	8.74188	8.57754	8.14077	8.14884	9.30203	9.18505	8.17418	8.1413	8.27344	8.53471	8.03687	8.56454	8.19844	9.32889	8.07629	8.20516	8.30759	10.2188	8.25684	8.50696	8.03181	8.91813
ZNF423	7.84194	7.85648	8.00145	7.86144	8.35439	8.72454	7.87201	9.6536	8.54362	7.8878	8.72084	7.87314	8.26582	7.87079	7.88182	8.35954	8.64018	7.89591	8.82019	7.88914	8.04087	8.38943	9.5934	7.97103	8.1465	8.08024	9.36954	7.89381	7.88887	8.99771	7.86766	8.1519	7.97525	7.846	7.89426	8.94654	8.29983

## Sheet: Fig.2_GSE16091
EMT	Immune score		EMT	StromalScore		EMT	TumorPurity		ImmuneScore	TumorPurity		StromalScore	TumorPurity
-2.00031	-2.24408		-2.00031	-0.952845		1.17807	-1.45979		0.893334	-1.45979		1.72863	-1.45979
-1.9796	0.107242		-1.9796	0.519971		1.69603	-1.21793		1.00984	-1.21793		1.19303	-1.21793
-1.66817	-1.3759		-1.66817	-1.65715		-1.35008	1.20315		-0.750701	1.20315		-1.60668	1.20315
-1.4492	-0.188684		-1.4492	-1.70039		0.351529	0.114453		-0.314202	0.114453		0.262758	0.114453
-1.35008	-0.750701		-1.35008	-1.60668		0.480296	0.356		-0.775026	0.356		0.2961	0.356
-1.12794	-0.7213		-1.12794	-1.52848		0.0377079	-1.53954		1.06465	-1.53954		1.6683	-1.53954
-0.956184	0.810126		-0.956184	0.16145		-0.442495	-1.60413		1.66663	-1.60413		1.09935	-1.60413
-0.695828	-0.54207		-0.695828	-1.37244		-0.956184	-0.50038		0.810126	-0.50038		0.16145	-0.50038
-0.543322	-0.783689		-0.543322	-1.29674		-0.695828	1.00562		-0.54207	1.00562		-1.37244	1.00562
-0.442495	1.66663		-0.442495	1.09935		-1.66817	1.49983		-1.3759	1.49983		-1.65715	1.49983
-0.389915	0.484966		-0.389915	0.753952		0.413428	0.879342		-1.19233	0.879342		-0.35508	0.879342
-0.101017	-0.543496		-0.101017	-1.55864		-0.543322	1.08917		-0.783689	1.08917		-1.29674	1.08917
-0.0439127	0.244844		-0.0439127	-0.118963		0.436415	-0.53991		0.719494	-0.53991		0.334696	-0.53991
-0.0401985	-0.815992		-0.0401985	0.764022		0.55332	0.239378		-0.68892	0.239378		0.435215	0.239378
-0.0302615	1.51929		-0.0302615	0.545212		-0.389915	-0.62677		0.484966	-0.62677		0.753952	-0.62677
0.0296627	-0.403052		0.0296627	-0.633828		0.353549	0.411462		-0.335286	0.411462		-0.310709	0.411462
0.0377079	1.06465		0.0377079	1.6683		-1.9796	-0.26688		0.107242	-0.26688		0.519971	-0.26688
0.111467	-1.04449		0.111467	-0.743285		-0.0302615	-1.17279		1.51929	-1.17279		0.545212	-1.17279
0.112604	-0.51901		0.112604	-0.166771		0.111467	0.977134		-1.04449	0.977134		-0.743285	0.977134
0.297115	0.421517		0.297115	0.145214		0.0296627	0.602135		-0.403052	0.602135		-0.633828	0.602135
0.351529	-0.314202		0.351529	0.262758		1.5504	0.077338		-0.251521	0.077338		0.265196	0.077338
0.353549	-0.335286		0.353549	-0.310709		-2.00031	1.59986		-2.24408	1.59986		-0.952845	1.59986
0.361054	2.0184		0.361054	1.18605		-1.12794	1.15712		-0.7213	1.15712		-1.52848	1.15712
0.413428	-1.19233		0.413428	-0.35508		1.20459	-0.02441		-0.365206	-0.02441		0.59012	-0.02441
0.436415	0.719494		0.436415	0.334696		2.06432	-1.12604		0.885596	-1.12604		1.17634	-1.12604
0.480296	-0.775026		0.480296	0.2961		-0.101017	1.086		-0.543496	1.086		-1.55864	1.086
0.55332	-0.68892		0.55332	0.435215		0.361054	-1.90077		2.0184	-1.90077		1.18605	-1.90077
0.71164	2.02506		0.71164	0.664299		0.297115	-0.25494		0.421517	-0.25494		0.145214	-0.25494
0.875244	-0.016036		0.875244	0.212098		0.112604	0.44155		-0.51901	0.44155		-0.166771	0.44155
1.17807	0.893334		1.17807	1.72863		-1.4492	0.975978		-0.188684	0.975978		-1.70039	0.975978
1.20459	-0.365206		1.20459	0.59012		0.875244	-0.03145		-0.016036	-0.03145		0.212098	-0.03145
1.5504	-0.251521		1.5504	0.265196		-0.0439127	-0.01148		0.244844	-0.01148		-0.118963	-0.01148
1.69603	1.00984		1.69603	1.19303		-0.0401985	0.145668		-0.815992	0.145668		0.764022	0.145668
2.06432	0.885596		2.06432	1.17634		0.71164	-1.58397		2.02506	-1.58397		0.664299	-1.58397

## Sheet: Fig.2_GSE39055
EMT	Immune score		EMT	Stromal Score		EMT	TumorPurity		Immune score	TumorPurity		StromalScore	TumorPurity
0.607913	1.92958		0.607913	0.573856		-0.39332	0.305668		-0.10691	0.305668		-0.22637	0.305668
1.04497	1.67113		1.04497	0.969422		0.450773	-0.17892		0.328304	-0.17892		0.0723	-0.17892
0.719652	1.64431		0.719652	0.428645		0.873654	-0.57108		0.859729	-0.57108		0.12943	-0.57108
1.4437	1.0736		1.4437	0.641296		-1.10617	-0.3214		0.437543	-0.3214		0.171145	-0.3214
0.873654	0.859729		0.873654	0.12943		0.084286	-0.96147		0.728187	-0.96147		0.768353	-0.96147
0.084286	0.728187		0.084286	0.768353		0.384802	-0.12177		0.569705	-0.12177		-0.22658	-0.12177
-0.30252	0.629123		-0.30252	-0.01061		-1.34484	0.085415		-0.05068	0.085415		0.041799	0.085415
0.669328	0.613481		0.669328	-0.20782		-0.33203	0.646005		-0.78609	0.646005		-0.119	0.646005
-0.16442	0.592519		-0.16442	-0.048		0.6464	0.544541		-0.67181	0.544541		-0.06901	0.544541
0.384802	0.569705		0.384802	-0.22658		0.335397	-0.0212		-0.50172	-0.0212		0.602583	-0.0212
0.667432	0.484668		0.667432	1.2987		-0.56076	-0.01355		-0.40775	-0.01355		0.506557	-0.01355
-1.10617	0.437543		-1.10617	0.171145		0.552208	0.002664		-0.07678	0.002664		0.183546	0.002664
0.450773	0.328304		0.450773	0.0723		-0.30252	-0.31552		0.629123	-0.31552		-0.01061	-0.31552
-1.55517	0.178997		-1.55517	-0.06126		0.051467	0.572533		-0.52381	0.572533		-0.24534	0.572533
-0.96401	0.142559		-0.96401	0.167587		0.546232	-0.33093		-0.31589	-0.33093		0.867184	-0.33093
-0.39463	0.115019		-0.39463	-0.13852		0.719652	-1.34038		1.64431	-1.34038		0.428645	-1.34038
0.106767	0.035389		0.106767	-0.02619		0.667432	-1.19946		0.484668	-1.19946		1.2987	-1.19946
-1.34484	-0.05068		-1.34484	0.041799		0.607913	-1.65937		1.92958	-1.65937		0.573856	-1.65937
0.552208	-0.07678		0.552208	0.183546		-0.39463	0.106423		0.115019	0.106423		-0.13852	0.106423
-0.08525	-0.0964		-0.08525	0.455974		-2.67278	1.03667		-0.23121	1.03667		-1.23148	1.03667
1.24193	-0.10228		1.24193	0.2457		-2.01279	3.89495		-4.05432	3.89495		-4.64299	3.89495
-0.39332	-0.10691		-0.39332	-0.22637		-0.08525	-0.17801		-0.0964	-0.17801		0.455974	-0.17801
1.27631	-0.11156		1.27631	0.376319		0.362894	-0.00777		-0.25416	-0.00777		0.359139	-0.00777
0.525871	-0.17533		0.525871	-0.01533		1.24193	-0.02484		-0.10228	-0.02484		0.2457	-0.02484
-2.67278	-0.23121		-2.67278	-1.23148		-0.96401	-0.12676		0.142559	-0.12676		0.167587	-0.12676
0.362894	-0.25416		0.362894	0.359139		-0.16442	-0.26453		0.592519	-0.26453		-0.048	-0.26453
0.789054	-0.297		0.789054	0.967673		0.525871	0.203435		-0.17533	0.203435		-0.01533	0.203435
0.546232	-0.31589		0.546232	0.867184		0.669328	-0.16344		0.613481	-0.16344		-0.20782	-0.16344
-0.56076	-0.40775		-0.56076	0.506557		0.789054	-0.41654		-0.297	-0.41654		0.967673	-0.41654
0.335397	-0.50172		0.335397	0.602583		1.27631	-0.11139		-0.11156	-0.11139		0.376319	-0.11139
0.051467	-0.52381		0.051467	-0.24534		0.672517	0.285461		-0.80816	0.285461		0.438805	0.285461
0.6464	-0.67181		0.6464	-0.06901		-2.37465	2.02627		-1.09373	2.02627		-2.16472	2.02627
-0.33203	-0.78609		-0.33203	-0.119		0.209778	1.42061		-1.36824	1.42061		-0.8328	1.42061
0.672517	-0.80816		0.672517	0.438805		0.106767	0.078418		0.035389	0.078418		-0.02619	0.078418
-2.37465	-1.09373		-2.37465	-2.16472		1.4437	-1.10397		1.0736	-1.10397		0.641296	-1.10397
0.209778	-1.36824		0.209778	-0.8328		1.04497	-1.78854		1.67113	-1.78854		0.969422	-1.78854
-2.01279	-4.05432		-2.01279	-4.64299		-1.55517	0.011792		0.178997	0.011792		-0.06126	0.011792

## Sheet: Fig.3
Months_RFS	Immune-high EMT-high	Immune-low EMT-high	Immune-high EMT-low	Immune-low EMT-low			Months_OS	Immune-high EMT-high	Immune-low EMT-high	Immune-high EMT-low	Immune-low EMT-low			Months_OS	EMT-high	EMT-low		Months_OS	Immune-high	Immune-low		Months_OS	Difference value of immune to EMT-high	Difference value of immune to EMT-low			Months_RFS	EMT-high	EMT-low		Months_RFS	Immune-high	Immune-low		Months_RFS	Difference value of immune to EMT-high	Difference value of immune to EMT-low
50.4	0						2.7	1						25	1			50.4	0			64.6	0				25	1			50.4	0			64.6	1
2.7	1						65.7	0						14	1			2.7	1			32	0				14	1			2.7	1			32	0
65.7	0						25	1						72.1	0			65.7	0			61.1	0				72.1	0			65.7	0			61.1	0
25	1						82.6	0						2.7	1			25	1			50.4	0				2.7	1			25	1			50.4	0
82.6	0						8.9	1						82.6	0			82.6	0			28.2	0				82.6	0			82.6	0			28.2	0
30.4	1						72.1		0					14.1	1			30.4	0			0	0				14.1	1			30.4	1			0	0
8.9	1						14		1					65.7	0			196.1	0			14.2	0				65.7	0			196.1	0			14.2	0
200.9	0						14.1		1					28	0			8.9	1			196.1	0				28	1			8.9	1			196.1	0
59.2	1						28		0					8.9	1			71.9	0			65.7	0				8.9	1			71.9	0			65.7	0
19.5	1						50.4			0				59.2		0		200.9	0			71.9	0				59.2	1			200.9	0			71.9	0
6.1	0						30.4			0				34.4		0		59.2	0			30.4	0				34.4	0			59.2	1			30.4	1
12.9		1					196.1			0				50.4		0		61.1	0			2.7		1			50.4	0			61.1	0			2.7	1
29.9		1					71.9			0				12.9		1		19.5	0			74.6		0			12.9	1			19.5	1			74.6	0
72.1		0					200.9			0				124.3		0		32	0			126.3		1			124.3	0			32	0			126.3	1
14		1					59.2			0				24.1		1		14.2	0			200.9		0			24.1	1			14.2	0			200.9	0
24.1		1					61.1			0				19.5		0		74.6	0			50		0			19.5	1			74.6	0			50	0
55.6		0					19.5			0				200.9		0		6.1	0			29.9		1			200.9	0			6.1	0			29.9	1
14.1		1					32			0				55.6		0		28.2	0			82.6		0			55.6	0			28.2	0			82.6	0
124.3		0					14.2			0				9.4		0		12.9		1		8.9		1			9.4	1			12.9		1		8.9		1
9.4		1					74.6			0				13.5		0		29.9		1		6.1		0			13.5	1			29.9		1		6.1		0
33.5		1					6.1			0				6.1		0		72.1		0		19.5		0			6.1	0			72.1		0		19.5		1
34.4		0					28.2			0				30.4		0		126.3		1		59.2		0			30.4	1			126.3		1		59.2		1
28		1					12.9				1			33.5		0		14		1		25		1			33.5	1			14		1		25		1
13.5		1					29.9				1			29.9		1		24.1		1		151		1			29.9	1			24.1		1		151		1
196.1			0				126.3				1			71.9		0		64.6		0		33.5		0			71.9		0		64.6		1		33.5		1
71.9			0				24.1				1			196.1		0		55.6		0		55.6		0			196.1		0		55.6		0		55.6		0
61.1			0				64.6				0			151		1		14.1		1		12.9		1			151		1		14.1		1		12.9		1
32			0				55.6				0			126.3		1		124.3		0		24.1		1			126.3		1		124.3		0		24.1		1
14.2			0				124.3				0			74.6		0		50		0		9.4		0			74.6		0		50		0		9.4		1
74.6			0				50				0			50		0		9.4		0		124.3		0			50		0		9.4		1		124.3		0
28.2			0				9.4				0			14.2		0		33.5		0		14.1		1			14.2		0		33.5		1		14.1		1
126.3				1			33.5				0			61.1		0		34.4		0		34.4		0			61.1		0		34.4		0		34.4		0
64.6				1			34.4				0			28.2		0		151		1		72.1		0			28.2		0		151		1		72.1		0
50				0			151				1			32		0		28		0		14		1			32		0		28		1		14		1
151				1			0				0			70.9		0		0		0		28		0			70.9		0		0		0		28		1
0				0			13.5				0			0		0		13.5		0		13.5		0			0		0		13.5		1		13.5		1
70.9				0			70.9				0			64.6		0		70.9		0		70.9		0			64.6		1		70.9		0		70.9		0

## Sheet: Fig.4
StromalSignature	EMT		EMT	Stromal		StromalSignature	EMT		EMT	Stromal		OS	EMT	Both StromalSignature and EMT	StromalSignature			RFS	EMT	Both StromalSignature and EMT	StromalSignature		EMT	Stroma		EMT	Stroma		EMT	Stroma
	14.3516		14.3516	9.04678			1.82038		0.32318	-0.6615		VIM	4.04973					ABI3BP	3.38664				0.93375	0.544032		0.470033	1.03713		0.990272	-0.93083
	13.8009		13.8009	8.77731			1.5125		0.43775	0.28606		GPX7	3.37185					SERPINH1	3.17987				0.889734	0.461912		0.587179	0.934234		0.599574	-1.01617
	13.6709		13.6709	8.52336			1.4512		0.584146	-1.15808		IL18R1			3.2415			AREG	3.07039				0.915774	0.548782		0.556373	0.985277		0.71894	-0.8443
	13.285		13.285	8.47324			1.43025		-0.2334	1.20251		CADM1	3.19948					SPON1			2.91456		1.04034	0.521035		0.480018	0.950553		1.11589	-0.86739
	13.2552		13.2552	8.45468			1.31959		-0.00243	-0.96727		SNAI2	3.05053					COMP		2.84173			0.945398	0.528084		0.488675	1.0228		0.952048	-0.95368
	12.6067		12.6067	8.44159			1.27021		0.774082	0.136893		FGF2	2.95426					VCAN	2.69126				1.01287	0.504725		0.451789	1.06316		1.16473	-1.07479
	12.5512		12.5512	8.42754			1.20647		0.146277	-1.35504		COMP		2.9253				COL1A1	2.6828				0.930807	0.517723		0.487157	1.0321		0.934096	-0.99532
	12.3582		12.3582	8.34866		1.20251			-0.35968	-0.18194		ABI3BP	2.91142					SERPINE2	2.60385				0.873104			0.552766			0.659486
	12.2208		12.2208	8.33549			1.14323		-1.74602	-1.292		THY1	2.84002					LAMA2	2.58593				0.980952			0.489166			1.00386
	12.0024		12.0024	8.09195			0.967318		0.185314	0.050684		SPARC	2.80349					IL18R1			2.57012		1.00507			0.498719			1.011
	11.9911		11.9911	8.01399			0.948264		0.487612	0.479781		LEPRE1	2.78693					VIM	2.51227				0.941563			0.505632			0.896969
	11.9259		11.9259	7.98774			0.890585		0.60075	0.00955		CDH6	2.76429					THY1	2.50582				0.936425			0.53317			0.812568
	11.6767		11.6767	7.94666			0.864089		-0.10514	-2.18297		SGCD		2.71612				COL4A2	2.48024				1.01161			0.506269			0.998685
	11.6538		11.6538	7.8909			0.850336		0.634744	-0.28518		GREM1		2.69626				MATN3	2.45655				1.02417			0.45811			1.16068
	11.6017		11.6017	7.72564			0.805231		0.362324	-0.19274		CD86			2.64737			MMP3		2.44524			0.980287			0.529046			0.889811
	11.5027		11.5027	7.70232			0.775339		0.431622	0.414549													0.940091			0.492303			0.933253
	11.4779		11.4779	7.65514			0.774082		0.500776	-0.36537													0.916428			0.570507			0.683777
	11.3791		11.3791	7.57419			0.753348		0.572327	-1.46228													0.977565			0.461903			1.0816
	11.3279		11.3279	7.54881			0.732098		0.753348	-1.44179
	11.2341		11.2341	7.5488			0.667792		0.864089	-1.50196
	11.0992		11.0992	7.53236			0.634744		-0.10323	-0.98319
	10.9087		10.9087	7.52485			0.60075		-1.4715	-1.13906
	10.8984		10.8984	7.49117			0.587438		-0.64609	0.199489
	10.8976		10.8976	7.49082			0.584146		-0.65881	-2.06423
	10.8889		10.8889	7.48739			0.572327		-0.71394	-2.15252
	10.8763		10.8763	7.48114			0.547838		-1.31209	-1.05629
	10.6458		10.6458	7.4801			0.544498		1.82038	-0.32691
	10.6363		10.6363	7.44131			0.538261		-0.83803	-0.01995
	10.6189		10.6189	7.43632			0.53784		1.5125	-3.04565
	10.6034		10.6034	7.42772			0.500776		1.31959	-0.59414
	10.5921		10.5921	7.42505			0.498619		-1.28079	-1.26653
	10.5627		10.5627	7.42038			0.487612		1.43025	-1.05743
	10.5319		10.5319	7.40793			0.48455		-0.27705	0.082988
	10.3787		10.3787	7.38239		0.479781			-0.66426	-0.20213
	10.3316		10.3316	7.37054			0.474217		-0.33936	-1.16192
	10.1596		10.1596	7.36382			0.460128		0.850336	-0.30302
	10.1582		10.1582	7.36327			0.457499		0.046616	-0.07574
	10.1488		10.1488	7.36008			0.43775		0.587438	-2.98873
	10.0673		10.0673	7.35501			0.431622		1.20647	-1.56568
	10.0642		10.0642	7.35344			0.427293		0.967318	-0.04717
	10.0423		10.0423	7.34707			0.418366		0.890585	-1.00453
	10.0148		10.0148	7.34476		0.414549			-0.46033	-0.17079
	9.99856		9.99856	7.34338			0.410702		1.14323	-0.71996
	9.98498		9.98498	7.3299			0.396405		-2.17469	-2.36161
	9.96612		9.96612	7.32749			0.362324		0.089061	-0.28422
	9.94987		9.94987	7.32319			0.341683		0.48455	-0.44141
	9.91312		9.91312	7.32263			0.32318		0.948264	-1.17083
	9.86932		9.86932	7.31755			0.313902		1.4512	-1.03306
	9.727		9.727	7.3167			0.312151		-0.24878	-0.26724
	9.69564		9.69564	7.30756			0.310591		-0.16671	-0.50952
	9.6332		9.6332	7.30733			0.293428		1.27021	-0.17488
	9.60307		9.60307	7.30663		0.28606			0.293428	-0.06006
	9.55498		9.55498	7.30508			0.278124		0.313902	-0.08263
	9.48822		9.48822	7.30157			0.277044		0.805231	-0.1911
	9.48766		9.48766	7.30154			0.263903		0.544498	-0.08094
	9.36881		9.36881	7.29818			0.263056		-2.30377	0.038672
	9.3557		9.3557	7.29443			0.260607		-0.33242	0.051038
	9.35382		9.35382	7.2915			0.253651		0.035742	0.187153
	9.34147		9.34147	7.28275			0.220315		-0.27439	-0.66984
	9.32523		9.32523	7.28198		0.199489			-1.72417	-0.58149
	9.28264		9.28264	7.27768			0.197015		-0.78683	-2.76803
	9.25457		9.25457	7.27498		0.187153			-1.31046	0.003879
	9.24477		9.24477	7.27177			0.185314		-0.54715	-0.18687
	9.24081		9.24081	7.27141			0.178914		-0.50797	0.033252
	9.23075		9.23075	7.26644			0.168096		-0.99001	-0.99964
	9.21729		9.21729	7.2606			0.151906		0.05369	-0.57567
	9.20433		9.20433	7.25953			0.146277		0.019853	-0.30444
	9.12787		9.12787	7.2504			0.14491		-0.35088	-1.36992
	9.11801		9.11801	7.24788		0.136893			0.547838	-1.73033
	9.10821		9.10821	7.24497			0.124875		-0.19222	-0.32166
9.04678			9.04159	7.2407			0.113882		0.074657	-1.7322
	9.04159		9.01876	7.2393			0.11285		0.474217	-0.03835
	9.01876		9.01071	7.23205			0.089061		0.341683	-0.03361
	9.01071		8.98357	7.23086			0.086279		-0.83716	-0.12438
	8.98357		8.92635	7.22944		0.082988			0.427293	-0.11194
	8.92635		8.89422	7.22922			0.08258		-0.84951	-1.32451
	8.89422		8.84832	7.22875			0.074657		-0.22963	-0.37229
	8.84832		8.83381	7.22849			0.073522		0.775339	-0.20637
	8.83381		8.81187	7.22736			0.066566		0.001825	0.047992
	8.81187		8.80256	7.22259			0.064437		0.066566	-0.20084
	8.80256		8.76666	7.2216			0.056928		0.667792	-1.45387
8.77731			8.74184	7.22108			0.056623		0.538261	-0.01692
	8.76666		8.71768	7.21803			0.05369		0.410702	-0.22204
	8.74184		8.7071	7.21802		0.051038			-0.25439	-0.87752
	8.71768		8.66994	7.21403		0.050684			-1.5052	0.03153
	8.7071		8.66962	7.2112		0.047992			-0.41922	-0.49185
	8.66994		8.64893	7.20619			0.046616		-1.68895	-2.29445
	8.66962		8.61727	7.20352			0.044887		-0.46383	-0.07811
	8.64893		8.59256	7.20256		0.038672			0.732098	-1.50214
	8.61727		8.57494	7.19463			0.035742		-0.69768	-0.03122
	8.59256		8.53796	7.19329			0.035363		0.312151	-1.83739
	8.57494		8.51529	7.19251		0.033252			0.460128	-0.24449
	8.53796		8.45321	7.18721		0.03153			-0.81832	-0.11972
8.52336			8.43104	7.18403			0.026785		-0.10645	-1.25742
	8.51529		8.4307	7.17891			0.020491		-0.90596	-1.62987
8.47324			8.41534	7.17675			0.019853		-1.51726	-0.07579
8.45468			8.41178	7.17645			0.014791		-3.06555	-0.11933
	8.45321		8.38439	7.17592			0.014639		-2.68219	-0.12823
8.44159			8.36316	7.17577			0.010762		-1.02801	-0.50379
	8.43104		8.34165	7.16521		0.00955			-1.1694	-0.12131
	8.4307		8.34038	7.162			0.006282		-0.24429	-2.48088
8.42754			8.3335	7.15907		0.003879			-1.37273	-0.61367
	8.41534		8.32384	7.15049			0.001825		0.08258	-0.28183
	8.41178		8.3021	7.14179			0.001726		0.396405	-0.762
	8.38439		8.30161	7.14052			-0.00243		-0.52997	-0.60962
	8.36316		8.29331	7.13718			-0.00748		-0.66291	-0.02321
8.34866			8.26502	7.1359		-0.01692			-1.2485	-0.70109
	8.34165		8.25299	7.12474		-0.01995			0.53784	-0.12489
	8.34038		8.19495	7.12423		-0.02321			-0.22693	-0.43557
8.33549			8.15377	7.12167		-0.03122			-0.11956	-2.6104
	8.3335		8.06391	7.12091		-0.03361			0.457499	-0.05399
	8.32384		8.05053	7.11009		-0.03835			0.056928	-0.08816
	8.3021		8.03928	7.10547			-0.03866		-0.11578	-3.52159
	8.30161		8.03262	7.0843		-0.04717			-0.06303	-3.18482
	8.29331		8.02296				-0.04996		-0.42904
	8.26502		7.99454			-0.05399			-0.00748
	8.25299		7.95897			-0.06006			-1.09507
	8.19495		7.88902				-0.06303		0.064437
	8.15377		7.8847				-0.06842		-0.19416
8.09195			7.87953				-0.07084		0.220315
	8.06391		7.87865			-0.07574			-0.46264
	8.05053		7.85518			-0.07579			0.310591
	8.03928		7.8115			-0.07811			-0.07982
	8.03262		7.80224				-0.07982		0.073522
	8.02296		7.80107			-0.08094			0.498619
8.01399			7.8002			-0.08263			0.253651
	7.99454		7.78425			-0.08816			0.277044
7.98774			7.73889				-0.10323		0.086279
	7.95897		7.71692				-0.10374		0.418366
7.94666			7.71253				-0.10514		0.168096
7.8909			7.70317				-0.10645		0.263903
	7.88902		7.67551			-0.11194			-0.61982
	7.8847		7.66911				-0.11578		-0.15654
	7.87953		7.66635			-0.11933			-0.13876
	7.87865		7.65712				-0.11956		0.197015
	7.85518		7.64031			-0.11972			0.14491
	7.8115		7.63866			-0.12131			0.263056
	7.80224		7.63833			-0.12438			0.124875
	7.80107		7.62255			-0.12489			0.260607
	7.8002		7.61867			-0.12823			-1.69175
	7.78425		7.60365				-0.13876		-0.03866
	7.73889		7.57778				-0.15654		0.11285
7.72564			7.57309				-0.16671		-0.6328
	7.71692		7.57271			-0.17079			0.113882
	7.71253		7.56115			-0.17488			0.151906
	7.70317		7.547			-0.18194			0.178914
7.70232			7.52593			-0.18687			0.278124
	7.67551		7.52345			-0.1911			0.001726
	7.66911		7.49827				-0.19222		0.035363
	7.66635		7.47058			-0.19274			-0.29895
	7.65712		7.43489				-0.19416		-1.20472
7.65514			7.4276			-0.20084			0.020491
	7.64031		7.40764			-0.20213			-0.07084
	7.63866		7.36054			-0.20637			-0.50089
	7.63833		7.35861			-0.22204			0.056623
	7.62255		7.31925				-0.22285		0.044887
	7.61867		7.30869				-0.22693		-0.06842
	7.60365		7.29952				-0.22963		-0.10374
	7.57778		7.26933				-0.2334		0.010762
7.57419			7.2684				-0.24429		-0.22285
	7.57309		7.23448			-0.24449			0.014639
	7.57271		7.22256				-0.24878		-0.04996
	7.56115		7.20005				-0.25439		0.014791
7.54881			7.19682			-0.26724			0.006282
7.5488			7.18041				-0.27439		0.026785
	7.547						-0.27705
7.53236						-0.28183
	7.52593					-0.28422
7.52485						-0.28518
	7.52345						-0.29895
	7.49827					-0.30302
7.49117						-0.30444
7.49082						-0.32166
7.48739						-0.32691
7.48114							-0.33242
7.4801							-0.33936
	7.47058						-0.35088
7.44131							-0.35968
7.43632						-0.36537
	7.43489					-0.37229
7.42772							-0.41922
	7.4276						-0.42904
7.42505						-0.43557
7.42038						-0.44141
7.40793							-0.46033
	7.40764						-0.46264
7.38239							-0.46383
7.37054						-0.49185
7.36382							-0.50089
7.36327						-0.50379
	7.36054						-0.50797
7.36008						-0.50952
	7.35861						-0.52997
7.35501							-0.54715
7.35344						-0.57567
7.34707						-0.58149
7.34476						-0.59414
7.34338						-0.60962
7.3299						-0.61367
7.32749							-0.61982
7.32319							-0.6328
7.32263							-0.64609
	7.31925						-0.65881
7.31755						-0.6615
7.3167							-0.66291
	7.30869						-0.66426
7.30756						-0.66984
7.30733							-0.69768
7.30663						-0.70109
7.30508							-0.71394
7.30157						-0.71996
7.30154						-0.762
	7.29952						-0.78683
7.29818							-0.81832
7.29443							-0.83716
7.2915							-0.83803
7.28275							-0.84951
7.28198						-0.87752
7.27768							-0.90596
7.27498						-0.96727
7.27177						-0.98319
7.27141							-0.99001
	7.26933					-0.99964
	7.2684					-1.00453
7.26644							-1.02801
7.2606						-1.03306
7.25953						-1.05629
7.2504						-1.05743
7.24788							-1.09507
7.24497						-1.13906
7.2407						-1.15808
7.2393						-1.16192
	7.23448						-1.1694
7.23205						-1.17083
7.23086							-1.20472
7.22944							-1.2485
7.22922						-1.25742
7.22875						-1.26653
7.22849							-1.28079
7.22736						-1.292
7.22259							-1.31046
	7.22256						-1.31209
7.2216						-1.32451
7.22108						-1.35504
7.21803						-1.36992
7.21802							-1.37273
7.21403						-1.44179
7.2112						-1.45387
7.20619						-1.46228
7.20352							-1.4715
7.20256						-1.50196
	7.20005					-1.50214
	7.19682						-1.5052
7.19463							-1.51726
7.19329						-1.56568
7.19251						-1.62987
7.18721							-1.68895
7.18403							-1.69175
	7.18041						-1.72417
7.17891						-1.73033
7.17675						-1.7322
7.17645							-1.74602
7.17592						-1.83739
7.17577						-2.06423
7.16521						-2.15252
7.162							-2.17469
7.15907						-2.18297
7.15049						-2.29445
7.14179							-2.30377
7.14052						-2.36161
7.13718						-2.48088
7.1359						-2.6104
7.12474							-2.68219
7.12423						-2.76803
7.12167						-2.98873
7.12091						-3.04565
7.11009							-3.06555
7.10547						-3.18482
7.0843						-3.52159
