# Supplementary material for: EMT-related gene expression is positively correlated with immunity and may be derived from stromal cells in osteosarcoma
Source: PeerJ. 2020 Feb 3;8:e8489. doi: 10.7717/peerj.8489 (PMC7003688; doi:10.7717/peerj.8489)
Supplement: Supplemental Information 2 [file peerj-08-8489-s002.xlsx]

## Sheet: Tumor
Gene	EMT	1	2	3	4	5		Gene	Stroma	1	2	3	4	5
ABI3BP	0.932818	0.932119	0.938114	0.940317	0.928496	0.925045		COMP	0.538829	0.539042	0.539825	0.536979	0.535098	0.543202
AREG	0.893255	0.889728	0.897762	0.890865	0.888286	0.899634		GREM1	0.46337	0.463572	0.45619	0.468078	0.459658	0.469352
CADM1	0.914387	0.909856	0.909018	0.919916	0.910385	0.922758		MMP3	0.549337	0.543856	0.544286	0.545661	0.55507	0.557812
CDH6	1.03885	1.04564	1.03215	1.0322	1.03695	1.04731		SGCD	0.518434	0.51655	0.523576	0.516365	0.512566	0.523113
COL1A1	0.943233	0.939461	0.936003	0.953188	0.936804	0.950709		CD86	0.531534	0.527102	0.529236	0.528909	0.537174	0.535248
COL4A2	1.01535	1.01466	1.01588	1.01285	1.01295	1.02043		IL18R1	0.502417	0.494936	0.503022	0.497253	0.510658	0.506216
FGF2	0.930164	0.940142	0.930177	0.925455	0.923184	0.931864		SPON1	0.517454	0.52716	0.511909	0.513574	0.508486	0.526141
GPX7	0.873075	0.875366	0.871519	0.875111	0.873994	0.869387
LAMA2	0.984025	0.984158	0.985714	0.989412	0.971981	0.988859
LEPRE1	1.00448	1.01198	0.998904	1.002	1.00659	1.00295
MATN3	0.942436	0.937846	0.939046	0.945121	0.944828	0.945336
SERPINE2	0.931663	0.92985	0.931244	0.929656	0.930376	0.937189
SERPINH1	1.01547	1.0167	1.01806	1.00921	1.01569	1.01769
SNAI2	1.02503	1.02742	1.02219	1.0312	1.02372	1.02063
SPARC	0.981047	0.987502	0.976816	0.987359	0.975898	0.977662
THY1	0.93933	0.941476	0.947362	0.946445	0.930907	0.930461
VCAN	0.913343	0.906864	0.910978	0.921219	0.918589	0.909067
VIM	0.977015	0.967974	0.986244	0.983087	0.977181	0.970588

## Sheet: Stroma
Gene	EMT	1	2	3	4	5		Gene	Stroma	1	2	3	4	5
ABI3BP	0.469824	0.479667	0.457872	0.472739	0.470488	0.468353		COMP	1.04365	1.04348	1.05284	1.04443	1.03075	1.04677
AREG	0.586733	0.588566	0.595571	0.576405	0.581794	0.591329		GREM1	0.929349	0.934021	0.931557	0.914586	0.935891	0.93069
CADM1	0.559524	0.55912	0.567621	0.540598	0.571536	0.558744		MMP3	0.987692	0.971713	1.00188	0.988472	0.978451	0.99795
CDH6	0.472952	0.47889	0.468399	0.476648	0.462331	0.478489		SGCD	0.957033	0.966325	0.94826	0.95789	0.961547	0.951143
COL1A1	0.495929	0.483635	0.481986	0.498186	0.508207	0.507629		CD86	1.01212	1.01226	1.02363	1.00415	1.01367	1.00691
COL4A2	0.454742	0.449503	0.461708	0.466674	0.447183	0.448642		IL18R1	1.06677	1.07394	1.07957	1.06237	1.04526	1.07272
FGF2	0.479365	0.483808	0.476058	0.46867	0.476553	0.491737		SPON1	1.02894	1.04479	1.01385	1.03062	1.01634	1.03909
GPX7	0.546806	0.544714	0.542723	0.540259	0.547875	0.558461
LAMA2	0.485309	0.474184	0.490273	0.496909	0.480446	0.484732
LEPRE1	0.497495	0.480106	0.502399	0.499711	0.494312	0.510947
MATN3	0.501777	0.509976	0.487835	0.486472	0.519199	0.505404
SERPINE2	0.536922	0.550326	0.545624	0.526527	0.522043	0.540092
SERPINH1	0.508438	0.523292	0.49642	0.497372	0.517584	0.507524
SNAI2	0.456071	0.464086	0.463832	0.444291	0.453567	0.454581
SPARC	0.525214	0.511903	0.543622	0.518913	0.532429	0.519204
THY1	0.493916	0.492168	0.478748	0.496172	0.511065	0.491425
VCAN	0.573148	0.570956	0.556168	0.573702	0.58206	0.582853
VIM	0.458146	0.465594	0.465931	0.448077	0.46296	0.448169

## Sheet: FC
Gene	EMT		Gene	Stroma
ABI3BP	0.989477		COMP	-0.953745
AREG	0.606368		GREM1	-1.00406
CADM1	0.708605		MMP3	-0.84637
CDH6	1.13522		SGCD	-0.884409
COL1A1	0.927482		CD86	-0.929154
COL4A2	1.15886		IL18R1	-1.0863
FGF2	0.956361		SPON1	-0.991656
GPX7	0.675077
LAMA2	1.01979
LEPRE1	1.0137
MATN3	0.909347
SERPINE2	0.795095
SERPINH1	0.998002
SNAI2	1.16834
SPARC	0.901417
THY1	0.927368
VCAN	0.672251
VIM	1.09257
